# Supplementary material for: Bridged 1,2,4-Trioxolanes: SnCl4—Catalyzed Synthesis and an In Vitro Study against S. mansoni
Source: MDPI journal article supplement (doi:10.3390/molecules28134913), 2023-06-22

## Supporting information

### **Bridged 1,2,4-Trioxolanes: SnCl<sub>4</sub> - Catalyzed Synthesis and an In Vitro Study against *S. mansoni***

**Peter S. Radulov<sup>1</sup>, Ivan A. Yaremenko<sup>1</sup>, Jennifer Keiser<sup>2,3</sup> and Alexander O. Terent'ev<sup>1\*</sup>**

<sup>1</sup>N. D. Zelinsky Institute of Organic Chemistry, Russian Academy of Sciences, 47 Leninsky Prospekt, 119991 Moscow, Russia

<sup>2</sup>Department of Medical Parasitology and Infection Biology, Swiss Tropical and Public Health Institute, CH-4123 Allschwil Switzerland

<sup>3</sup>University of Basel, CH-4003 Basel, Switzerland

\* Correspondence: alterex@yandex.ru; Tel.: +7-916-385-4080

## NMR spectra of peroxides 2a-k and 3a-k

$^1\text{H}$  NMR (300.13 MHz,  $\text{CDCl}_3$ ). Ethyl (1*R*\*,2*R*\*,5*S*\*)-2-(4-chlorobenzyl)-1,5-dimethyl-6,7,8-trioxabicyclo[3.2.1]octane-2-carboxylate, 2a

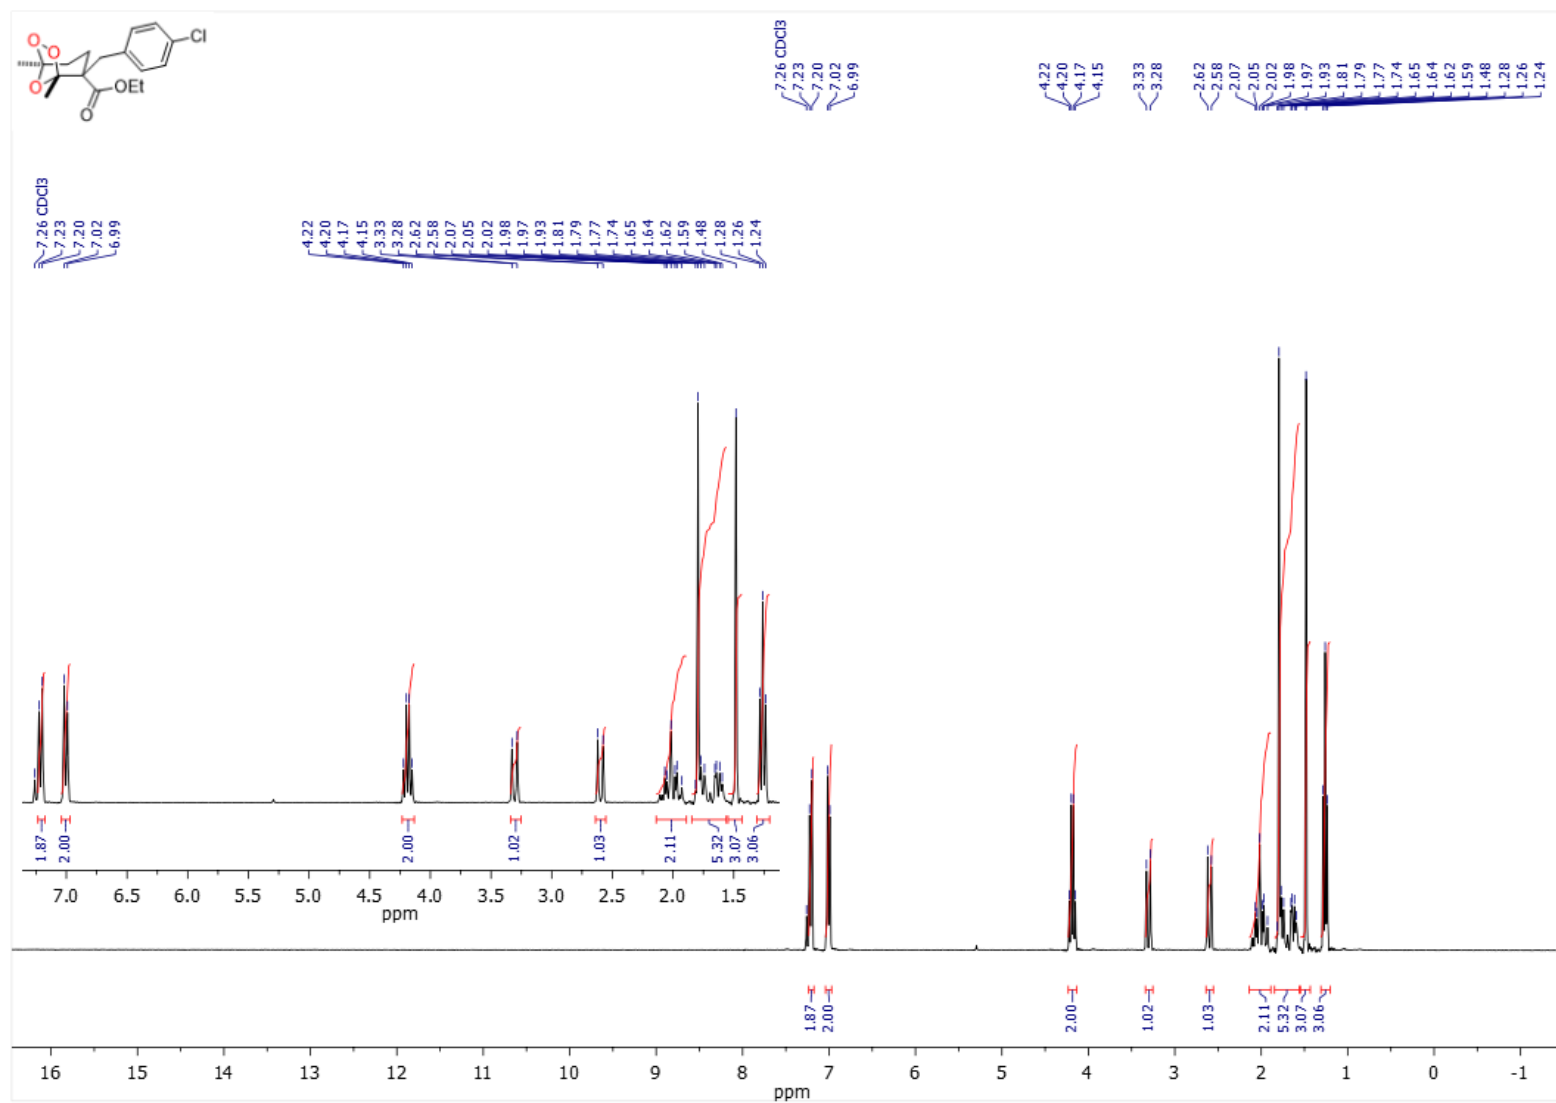

$^{13}\text{C}$  NMR (75.48 MHz,  $\text{CDCl}_3$ ). Ethyl (1*R*\*,2*R*\*,5*S*\*)-2-(4-chlorobenzyl)-1,5-dimethyl-6,7,8-trioxabicyclo[3.2.1]octane-2-carboxylate, 2a

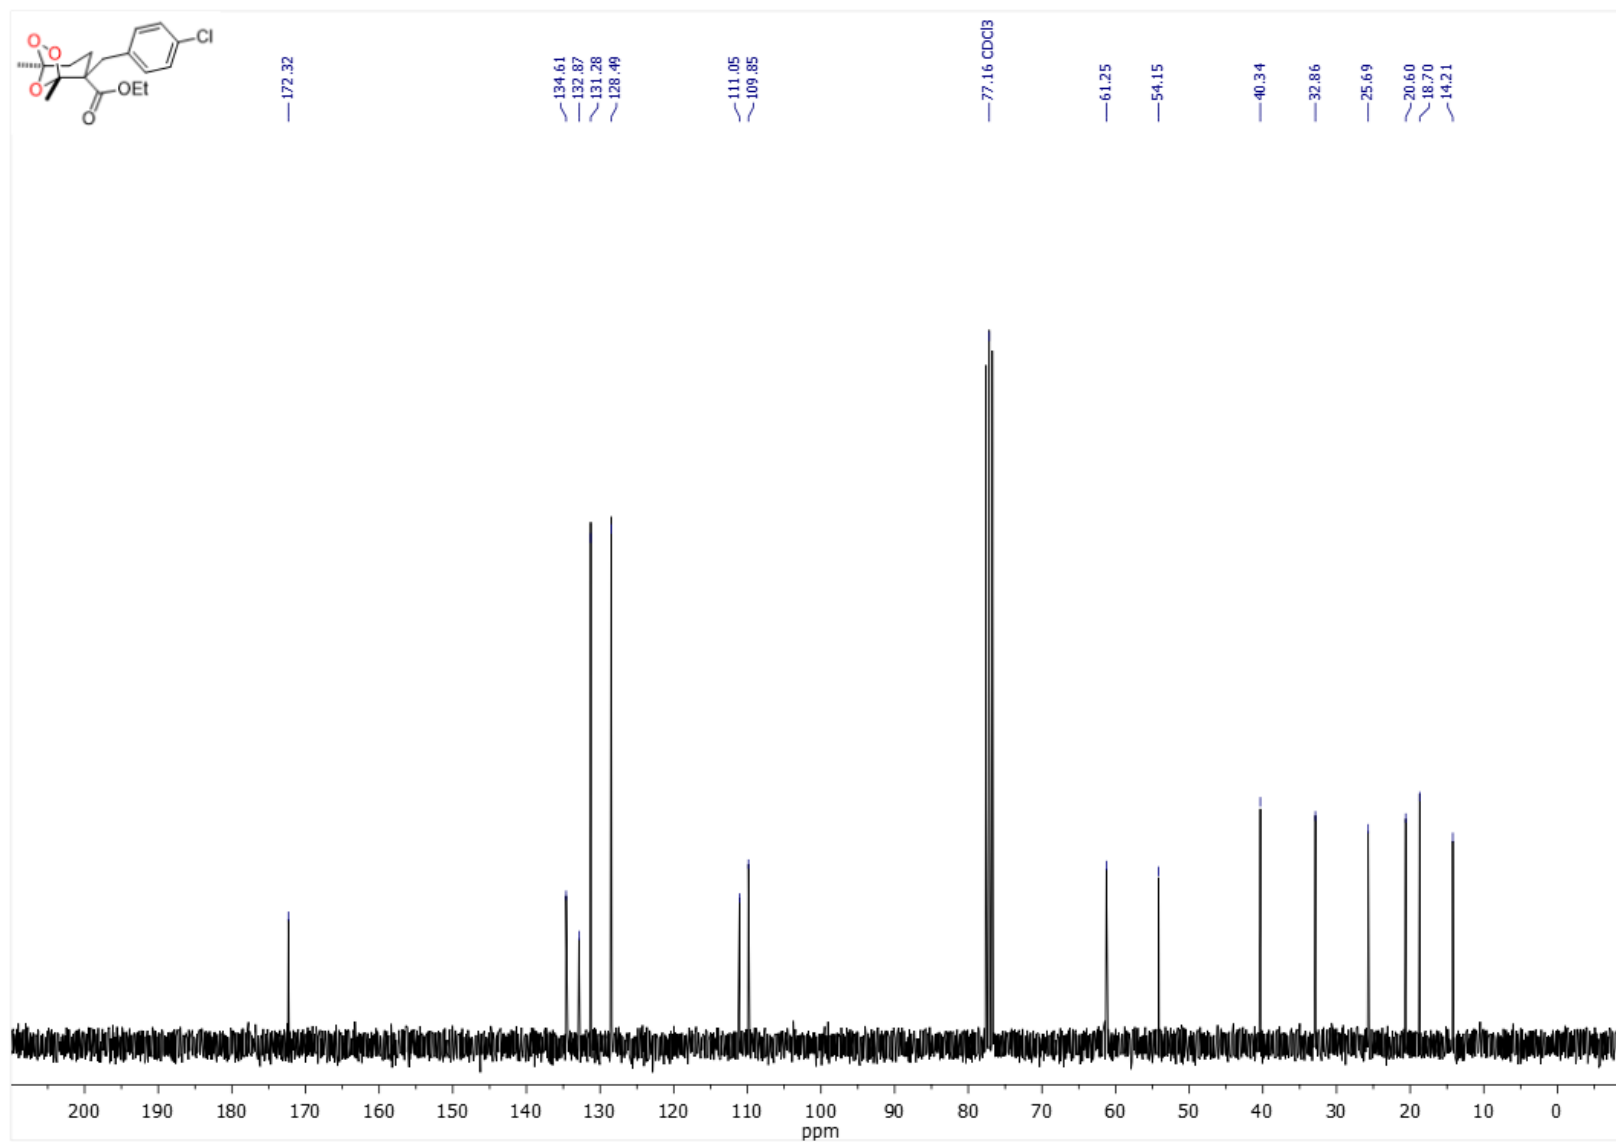

$^1\text{H}$  NMR (300.13 MHz,  $\text{CDCl}_3$ ). Ethyl (1*R*\*,2*S*\*,5*S*\*)-2-(4-chlorobenzyl)-1,5-dimethyl-6,7,8-trioxabicyclo[3.2.1]octane-2-carboxylate, 3a

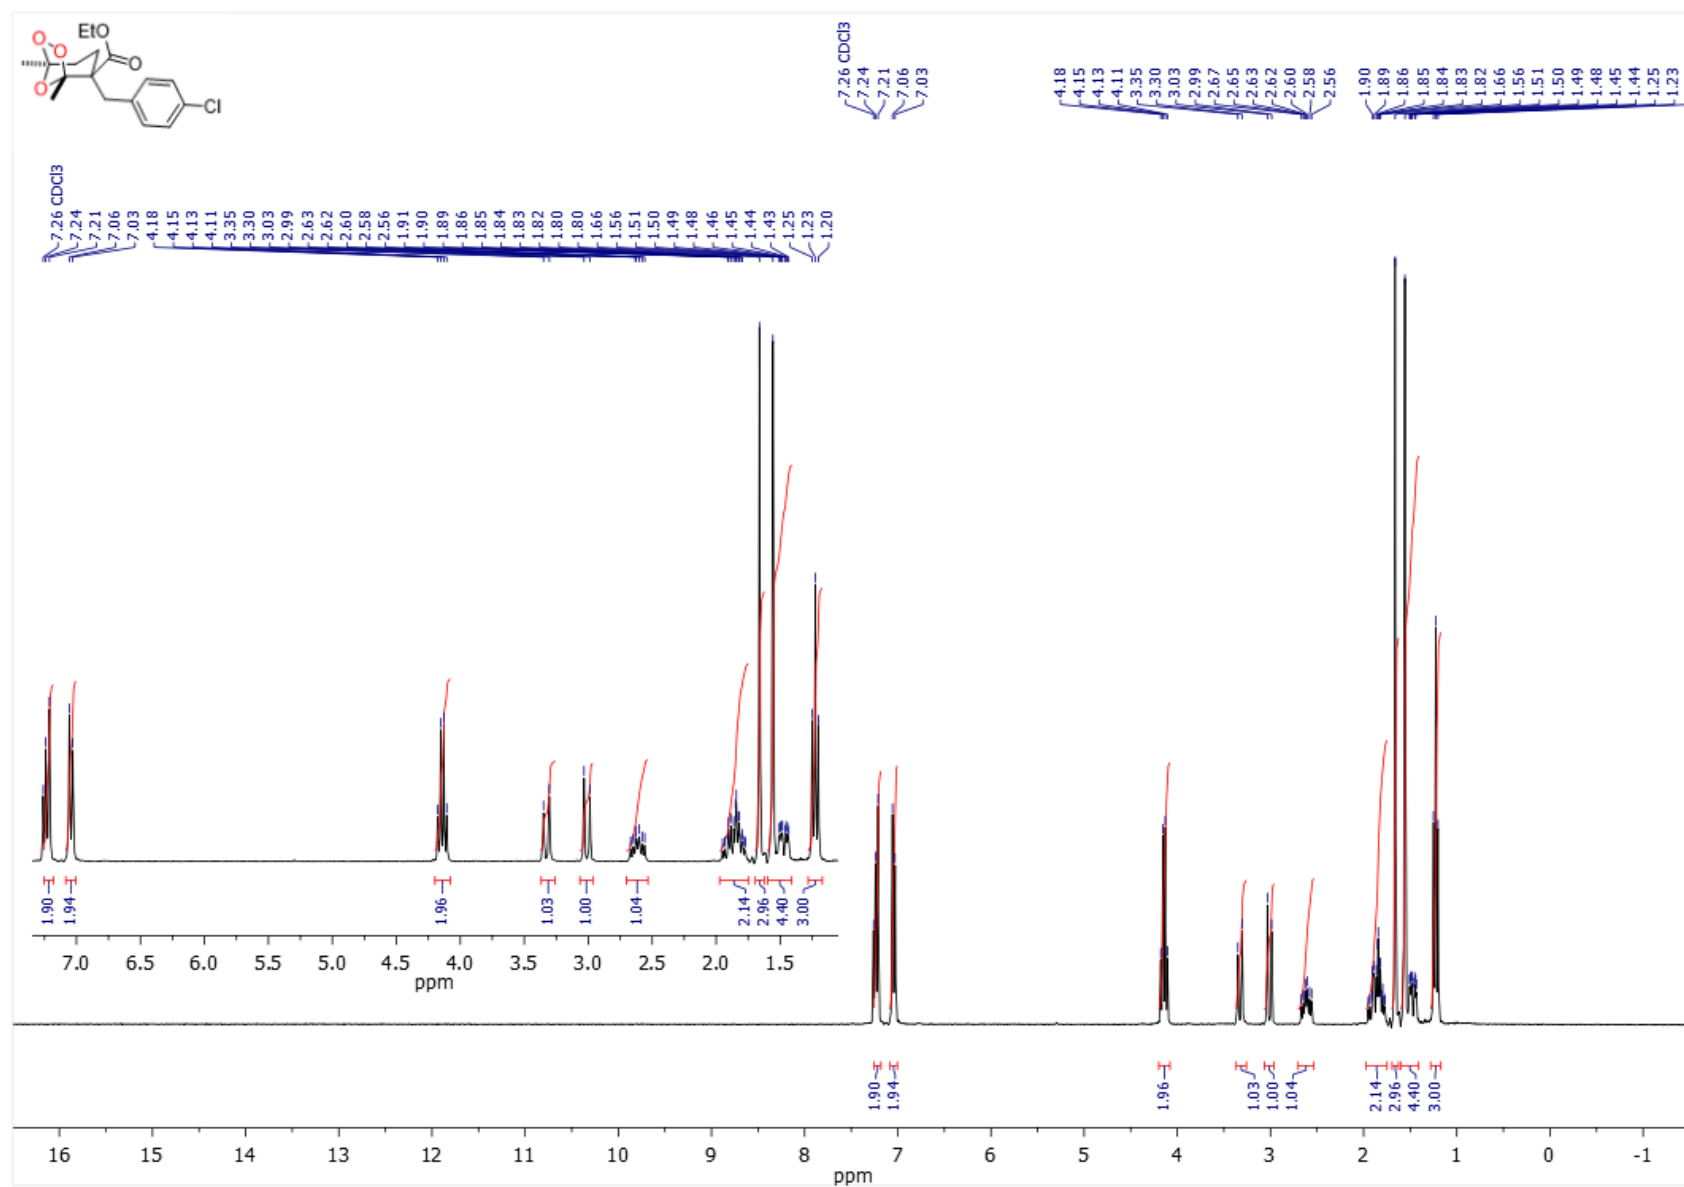

$^{13}\text{C}$  NMR (75.48 MHz,  $\text{CDCl}_3$ ). Ethyl (1*R*\*,2*S*\*,5*S*\*)-2-(4-chlorobenzyl)-1,5-dimethyl-6,7,8-trioxabicyclo[3.2.1]octane-2-carboxylate, 3a

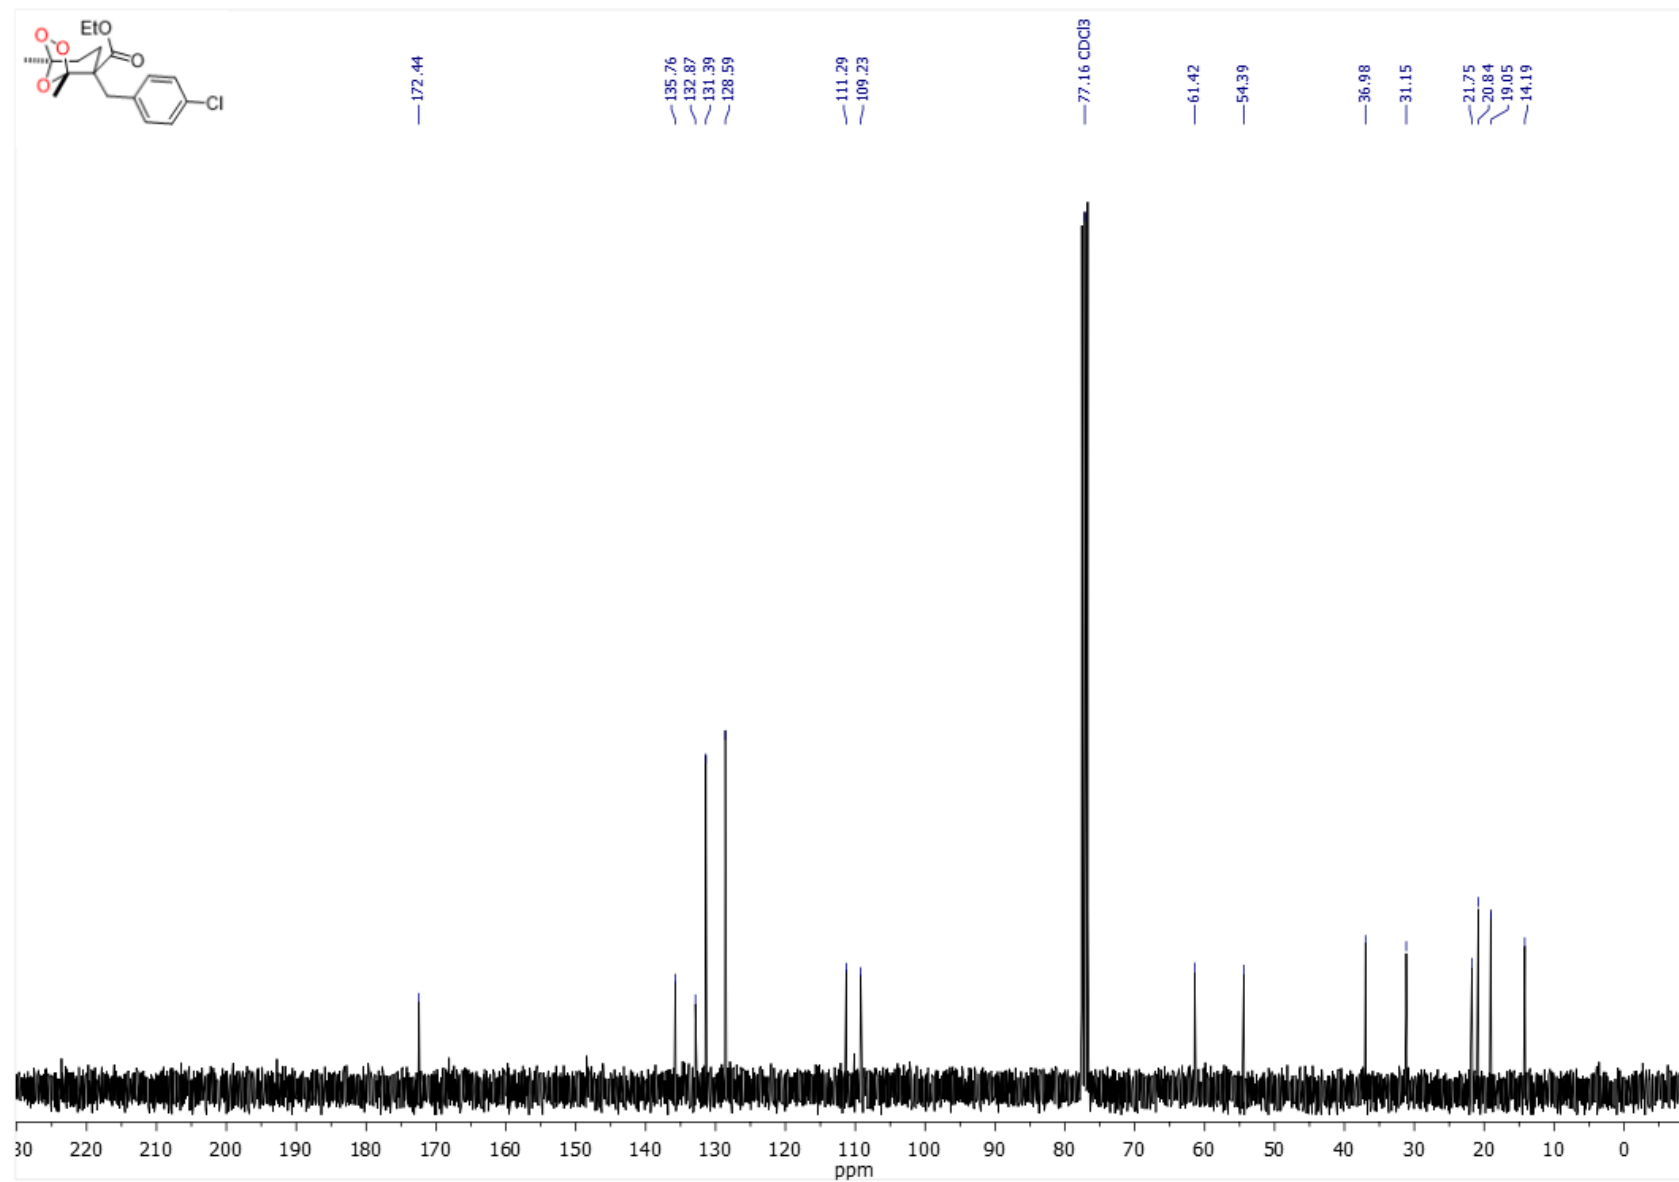

$^1\text{H}$  NMR (300.13 MHz,  $\text{CDCl}_3$ ). Ethyl (1*R*\*,2*R*\*,5*S*\*)-2-benzyl-1,5-dimethyl-6,7,8-trioxabicyclo[3.2.1]octane-2-carboxylate, 2b

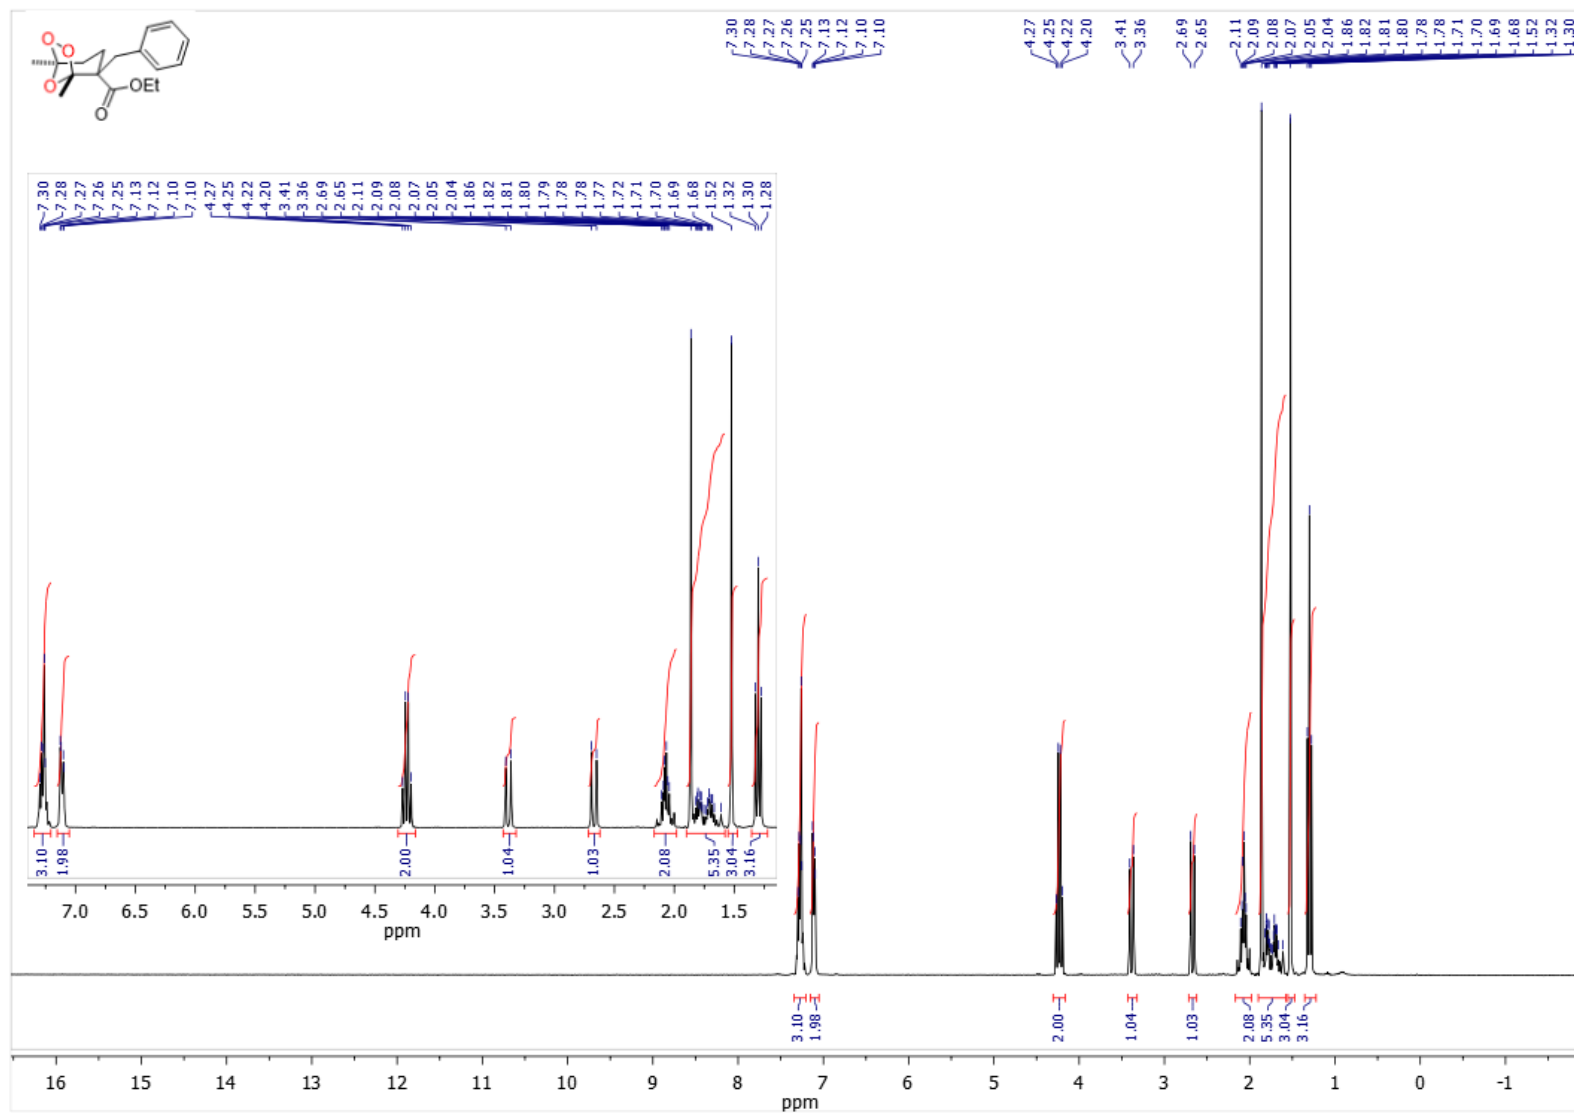

$^{13}\text{C}$  NMR (75.48 MHz,  $\text{CDCl}_3$ ). Ethyl (1*R*\*,2*R*\*,5*S*\*)-2-benzyl-1,5-dimethyl-6,7,8-trioxabicyclo[3.2.1]octane-2-carboxylate, 2b

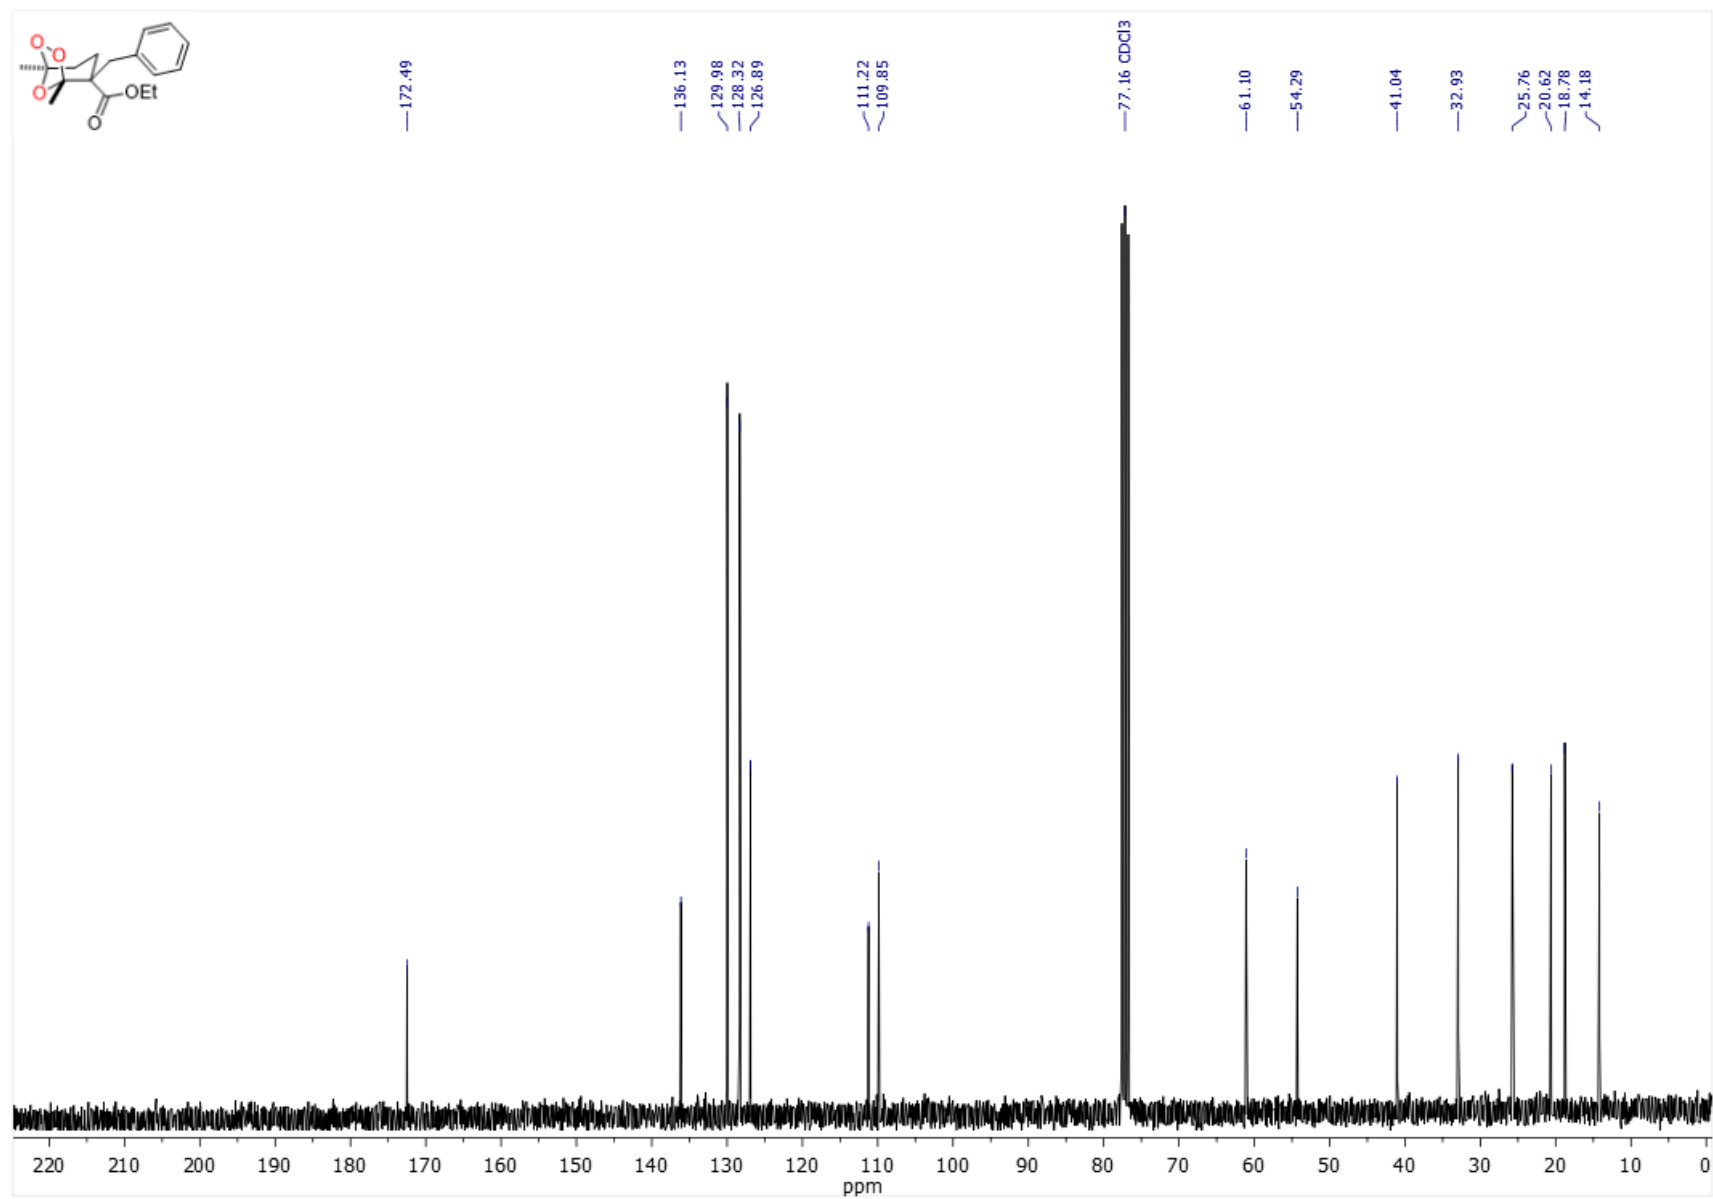

$^1\text{H}$  NMR (300.13 MHz,  $\text{CDCl}_3$ ). Ethyl (1*R*\*,2*S*\*,5*S*\*)-2-benzyl-1,5-dimethyl-6,7,8-trioxabicyclo[3.2.1]octane-2-carboxylate, 3b

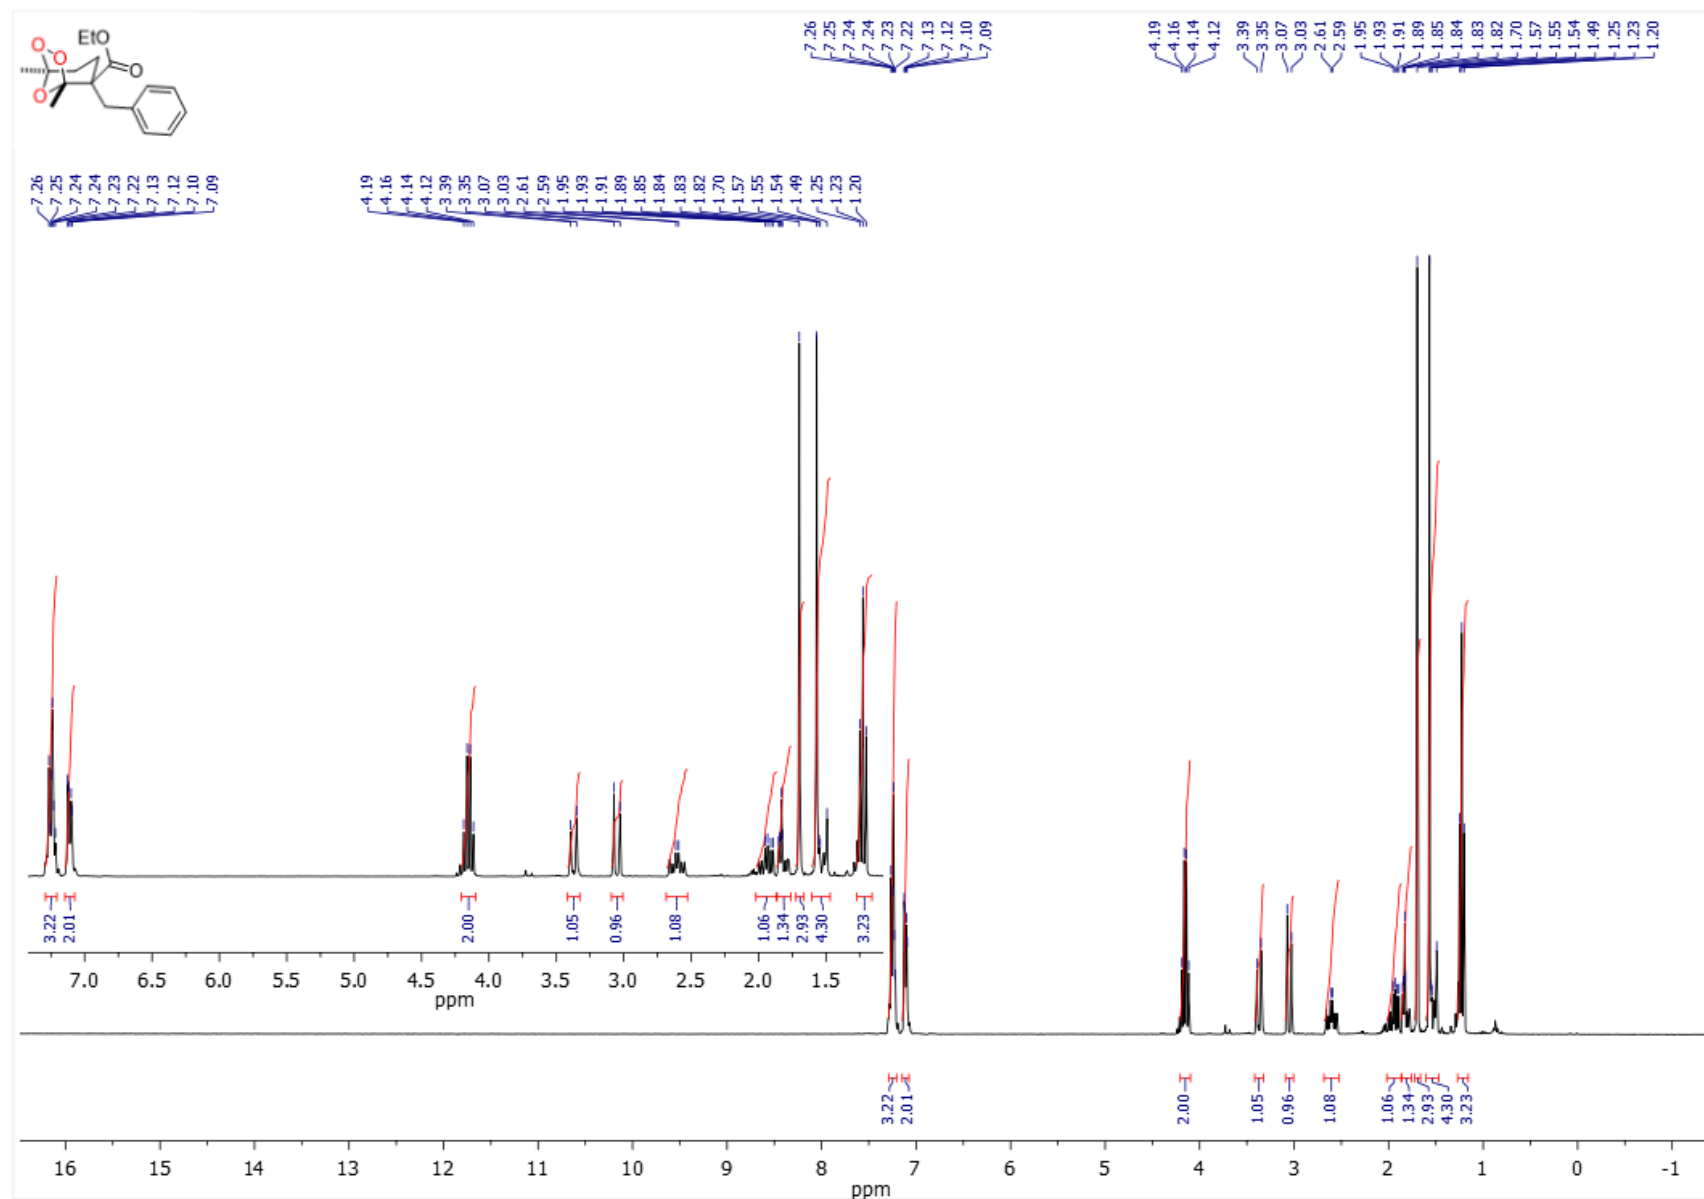



$^{13}\text{C}$  NMR (75.48 MHz,  $\text{CDCl}_3$ ). Ethyl (1*R*\*,2*S*\*,5*S*\*)-2-benzyl-1,5-dimethyl-6,7,8-trioxabicyclo[3.2.1]octane-2-carboxylate, **3b**

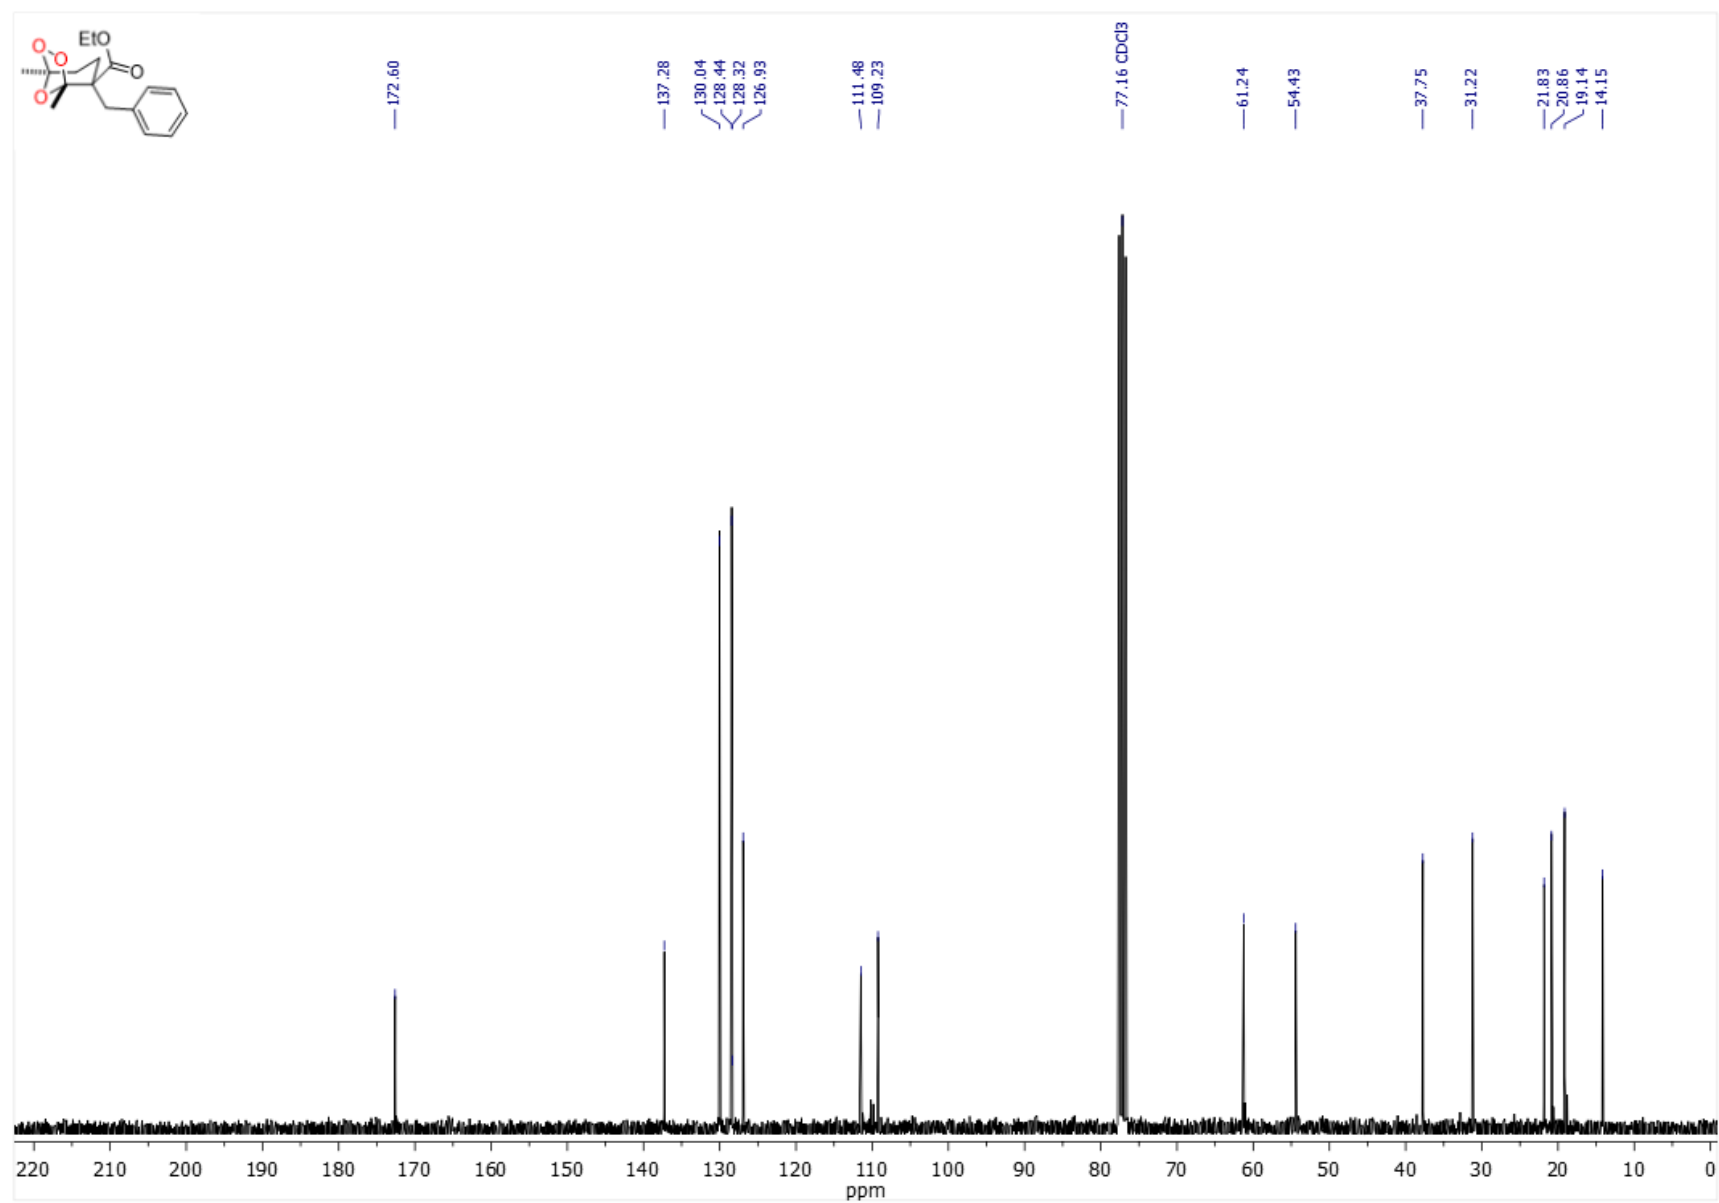

$^1\text{H}$  NMR (300.13 MHz,  $\text{CDCl}_3$ ). Ethyl (1*R*\*,2*R*\*,5*S*\*)-2-(4-bromobenzyl)-1,5-dimethyl-6,7,8-trioxabicyclo[3.2.1]octane-2-carboxylate, 2c

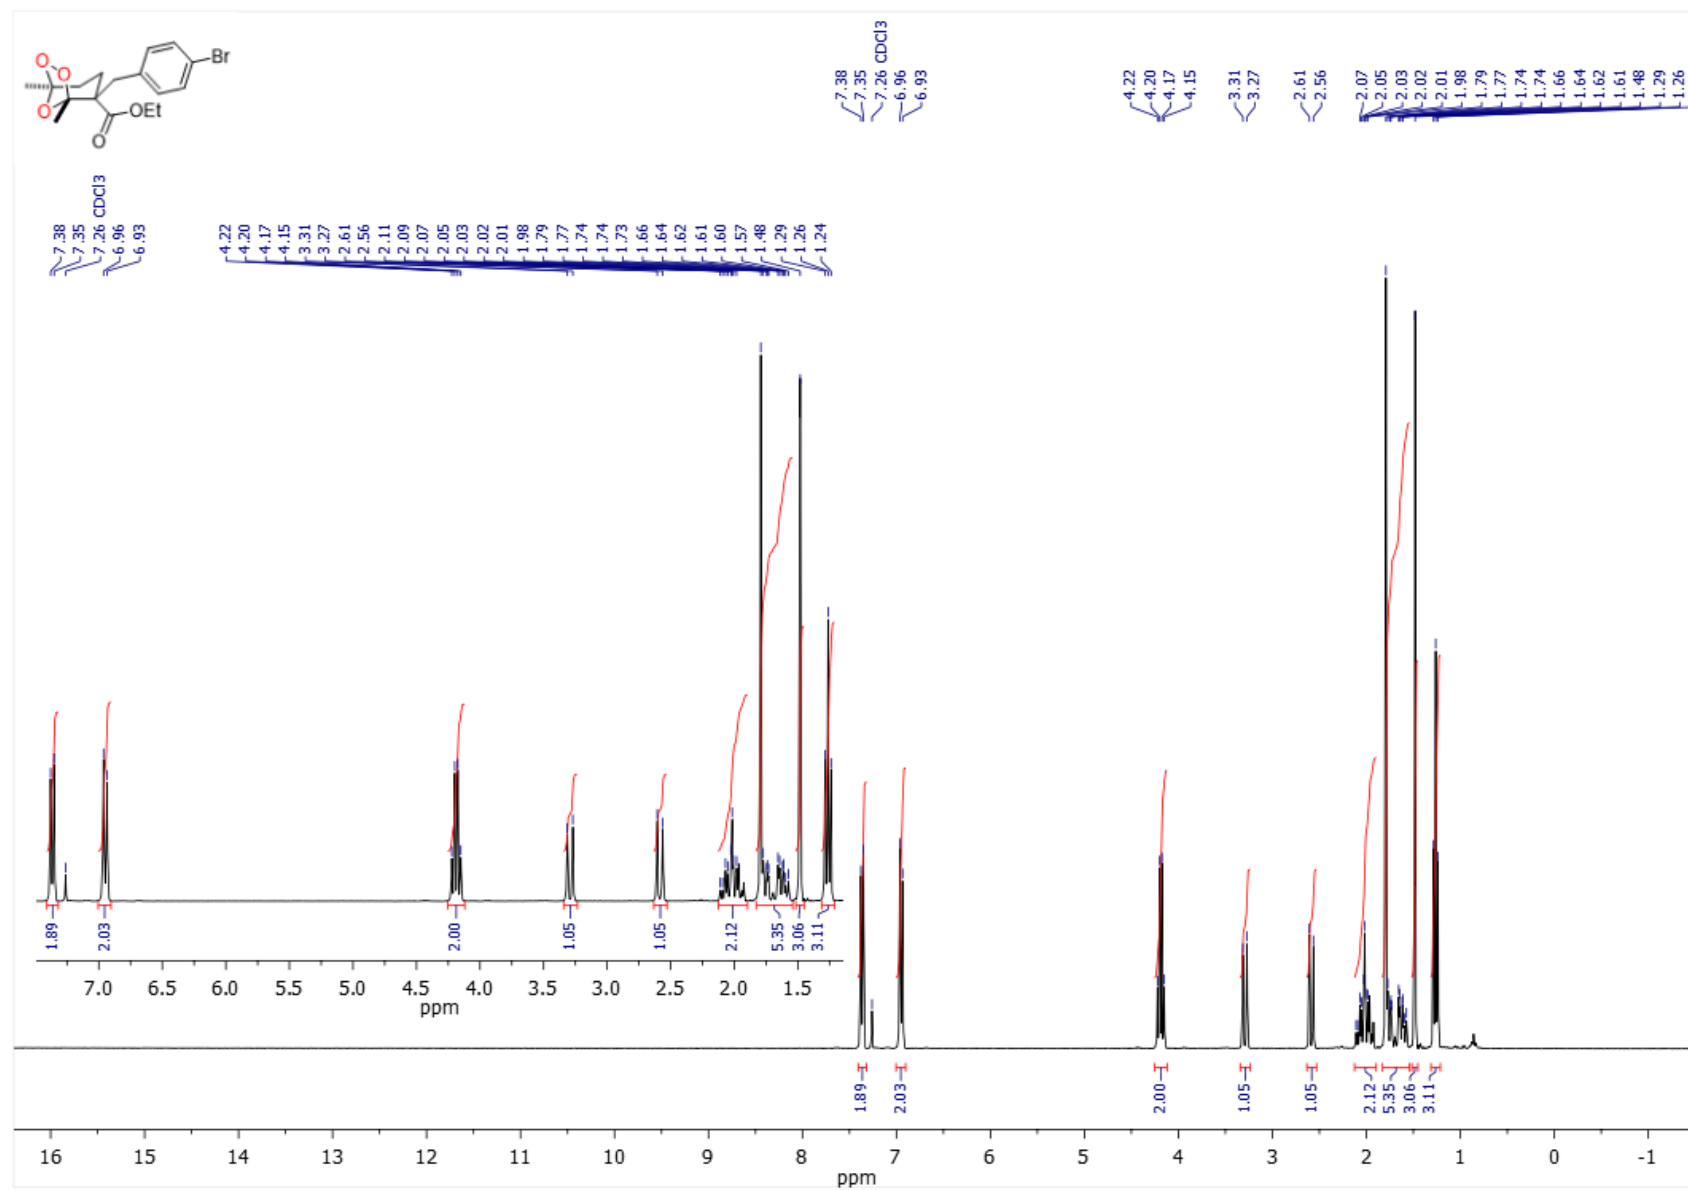

$^{13}\text{C}$  NMR (75.48 MHz,  $\text{CDCl}_3$ ). Ethyl (1*R*\*,2*R*\*,5*S*\*)-2-(4-bromobenzyl)-1,5-dimethyl-6,7,8-trioxabicyclo[3.2.1]octane-2-carboxylate, 2c

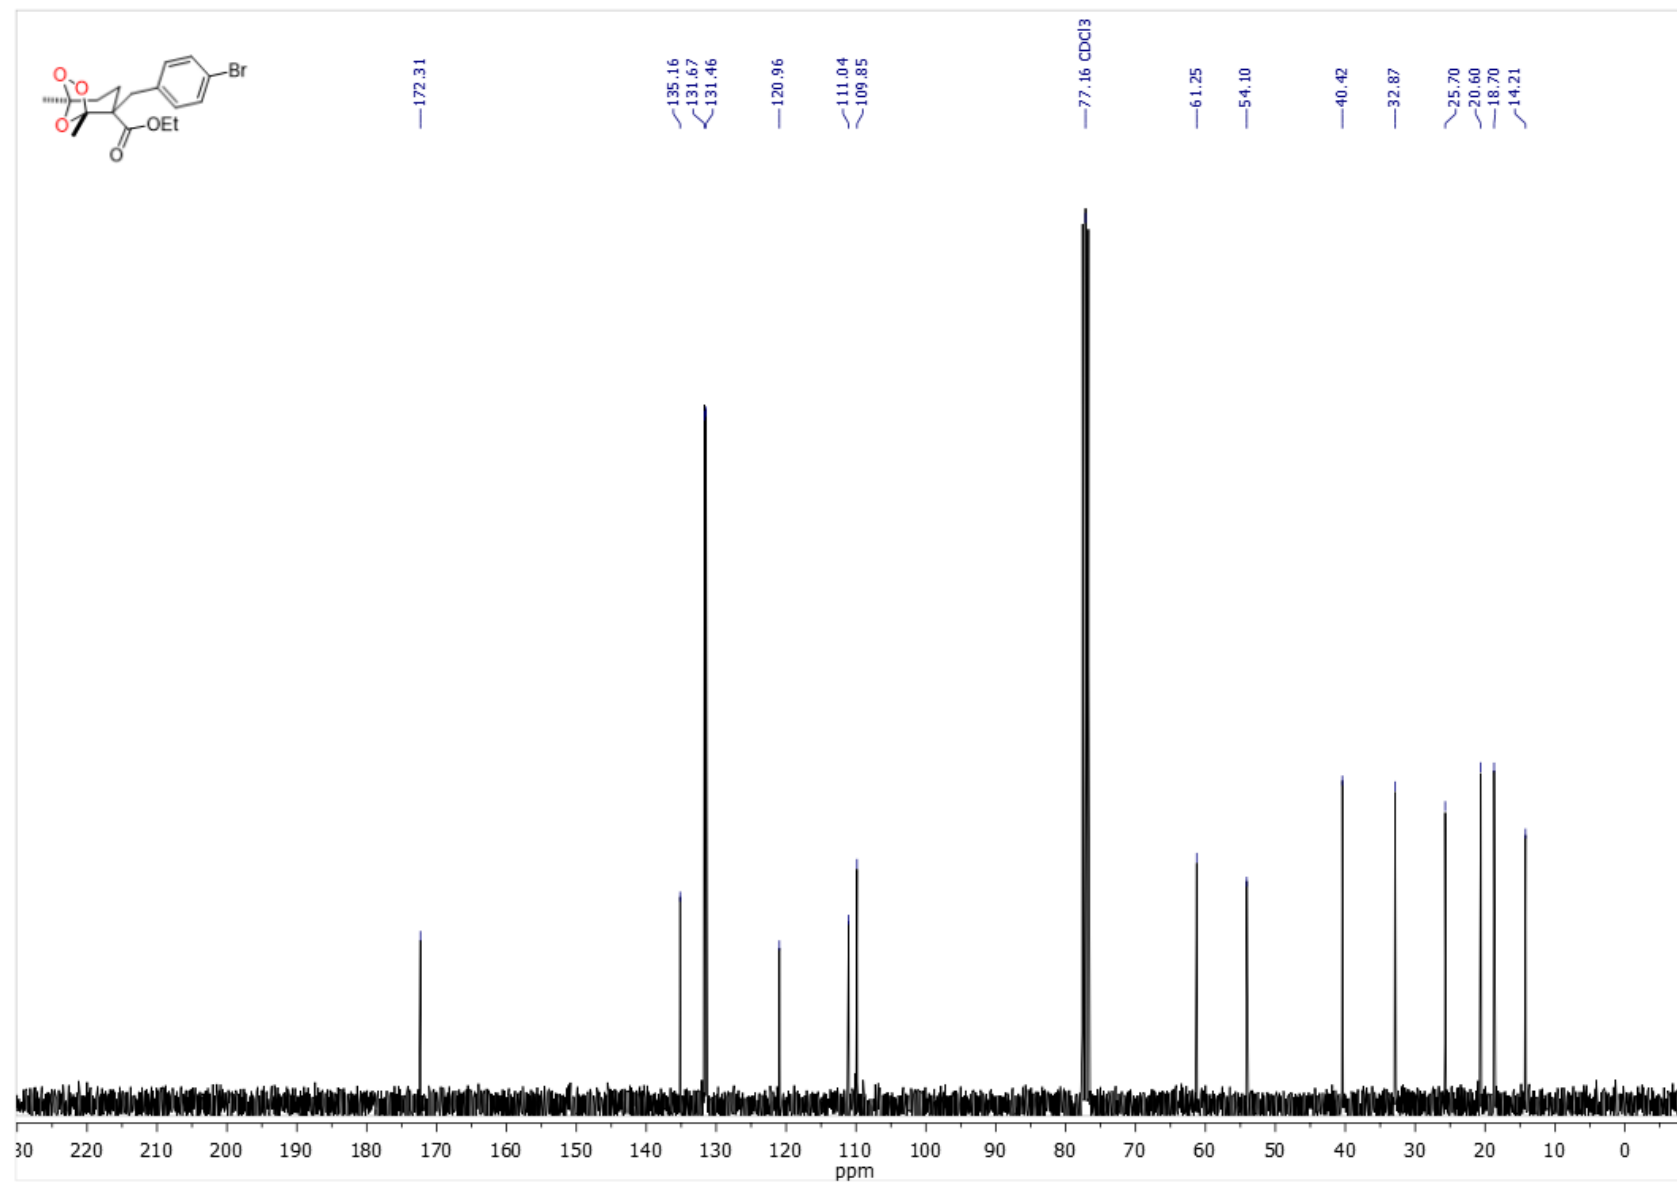

$^1\text{H}$  NMR (300.13 MHz,  $\text{CDCl}_3$ ). Ethyl (1*R*\*,2*S*\*,5*S*\*)-2-(4-bromobenzyl)-1,5-dimethyl-6,7,8-trioxabicyclo[3.2.1]octane-2-carboxylate, **3c**

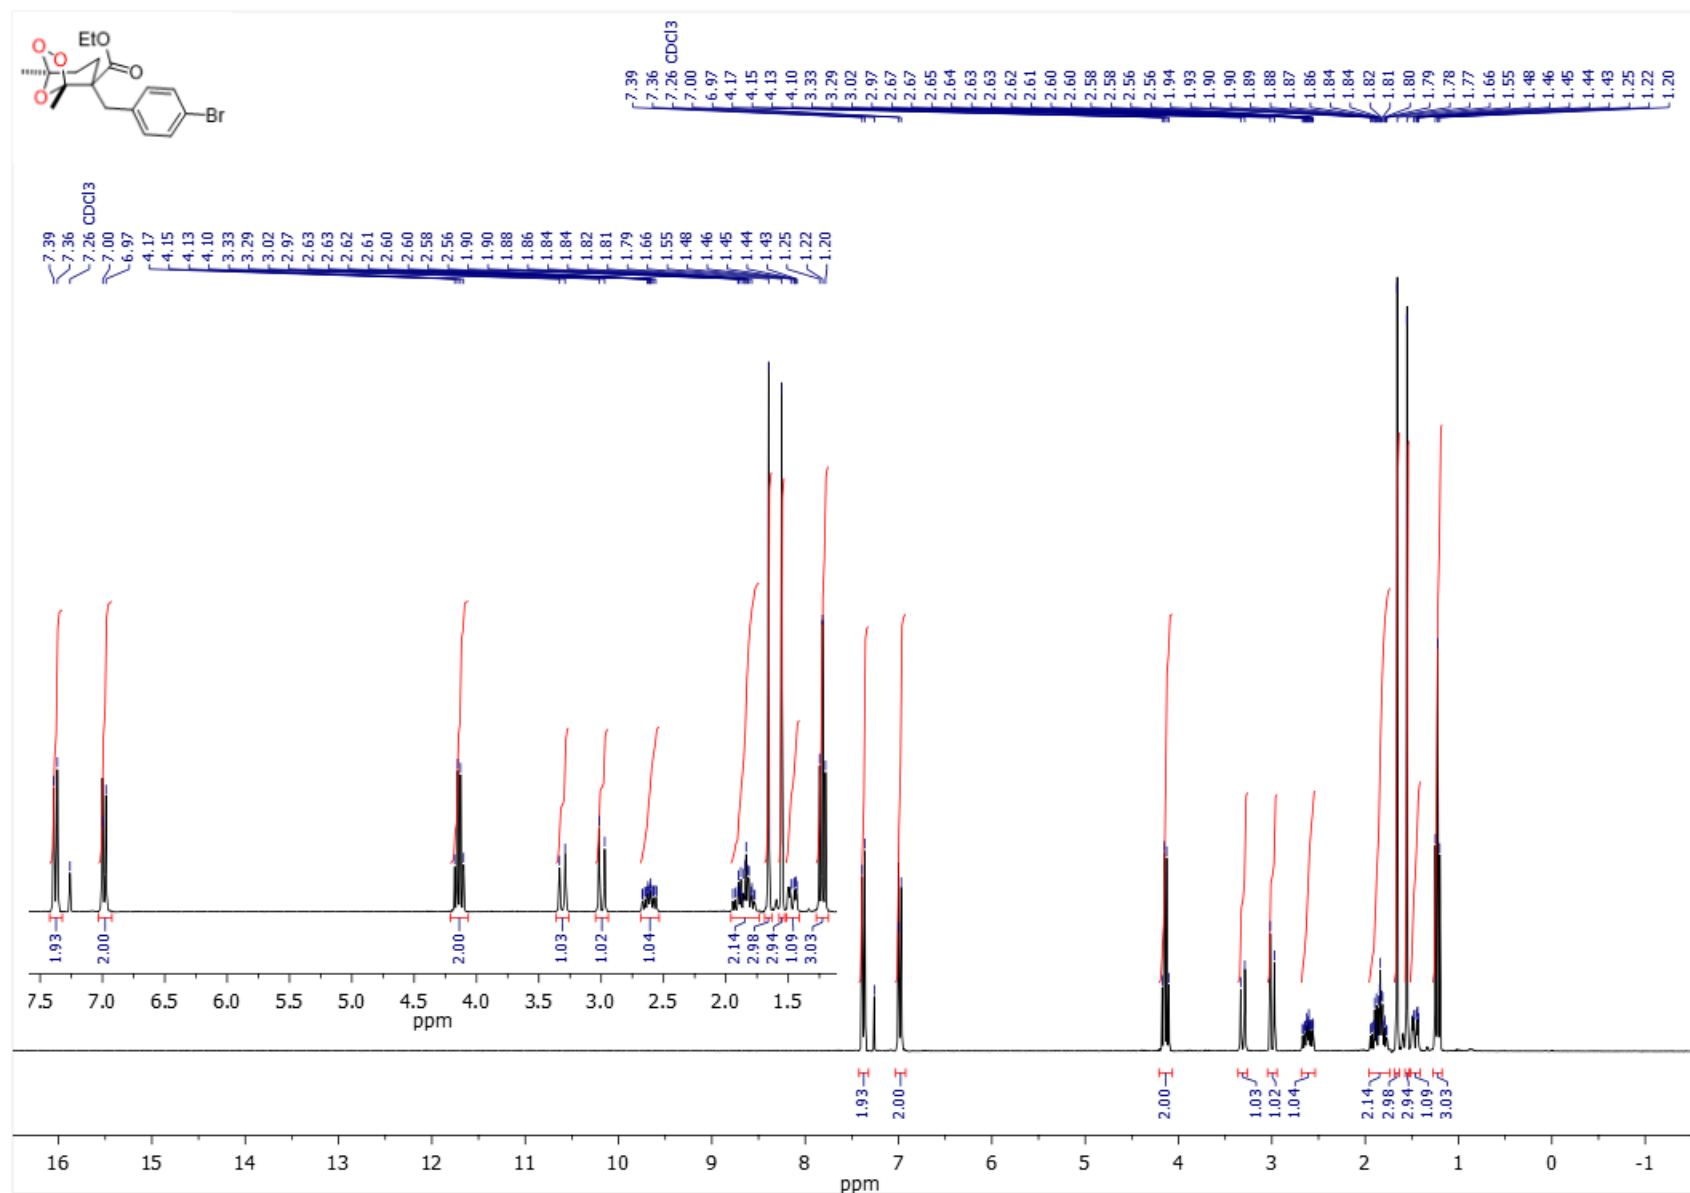

$^{13}\text{C}$  NMR (75.48 MHz,  $\text{CDCl}_3$ ). Ethyl (1*R*\*,2*S*\*,5*S*\*)-2-(4-bromobenzyl)-1,5-dimethyl-6,7,8-trioxabicyclo[3.2.1]octane-2-carboxylate, 3c

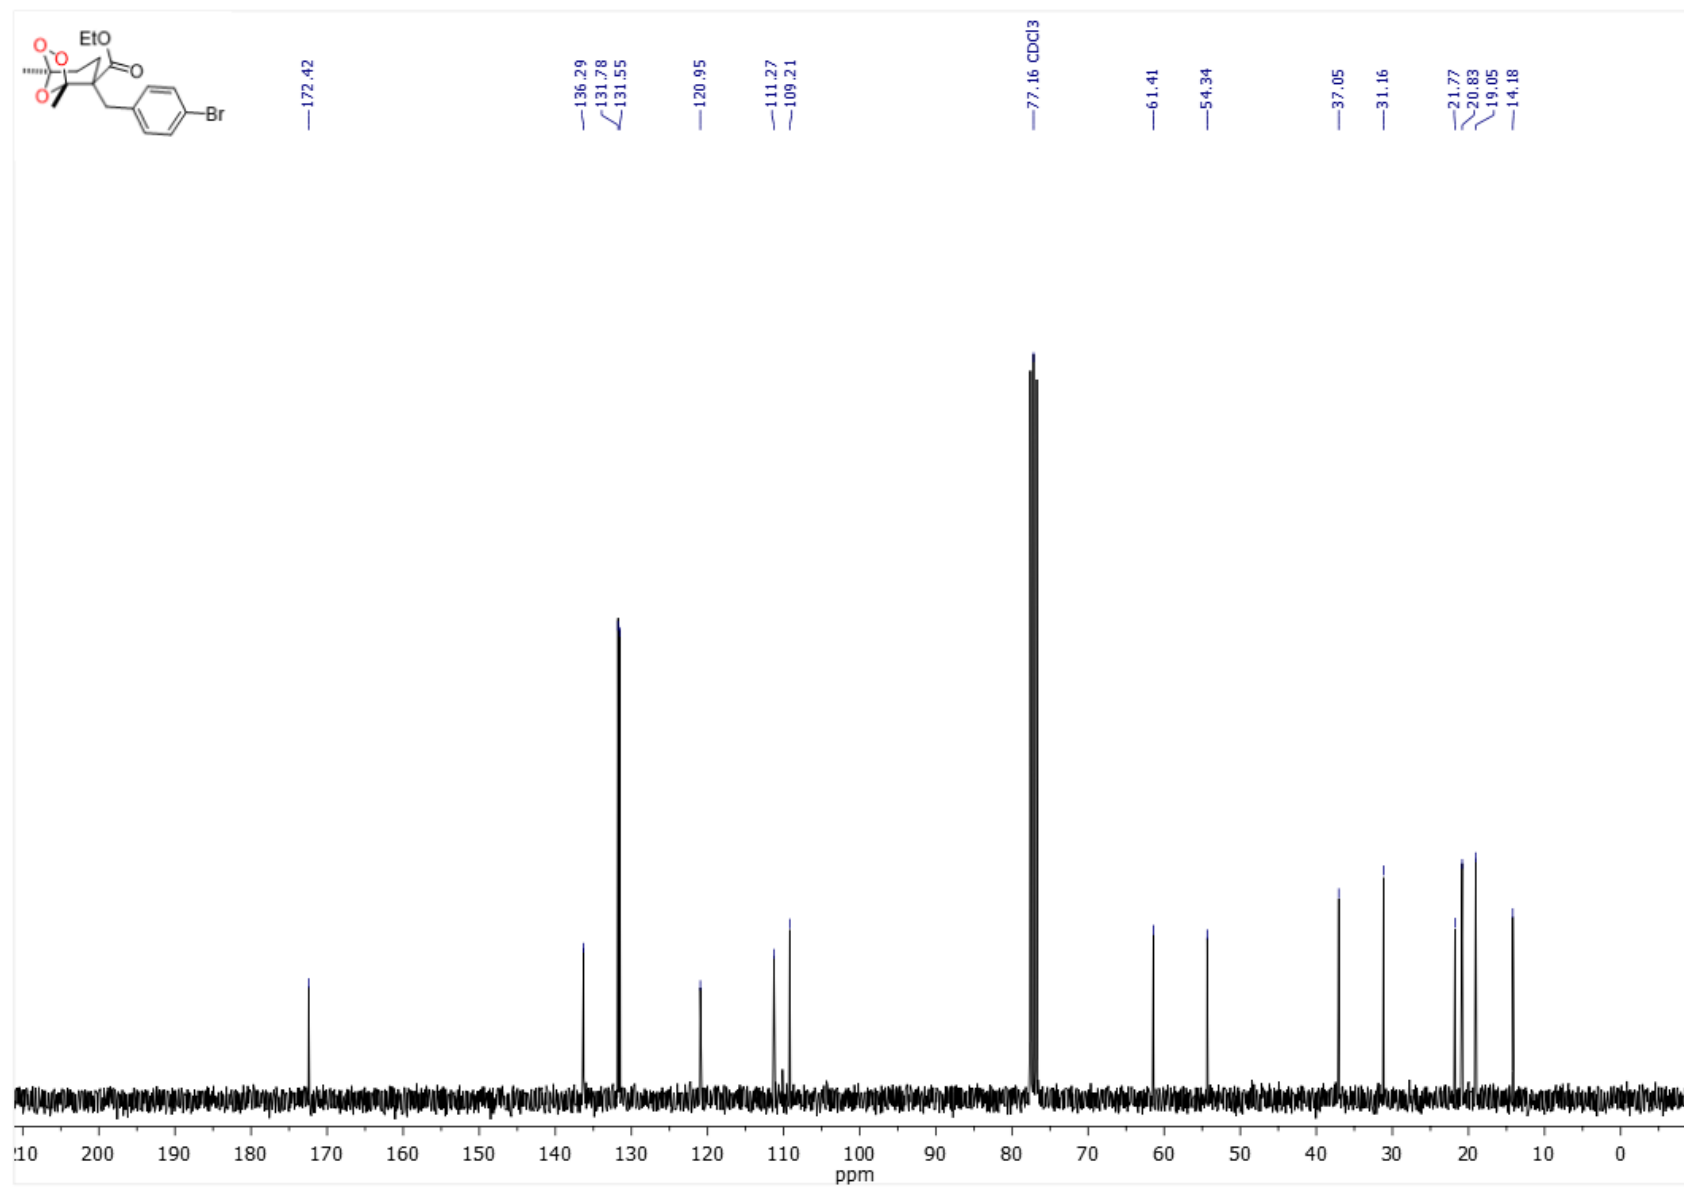

$^1\text{H}$  NMR (300.13 MHz,  $\text{CDCl}_3$ ). Ethyl (1R\*,2R\*,5S\*)-1,5-dimethyl-2-(4-methylbenzyl)-6,7,8-trioxabicyclo[3.2.1]octane-2-carboxylate, 2d

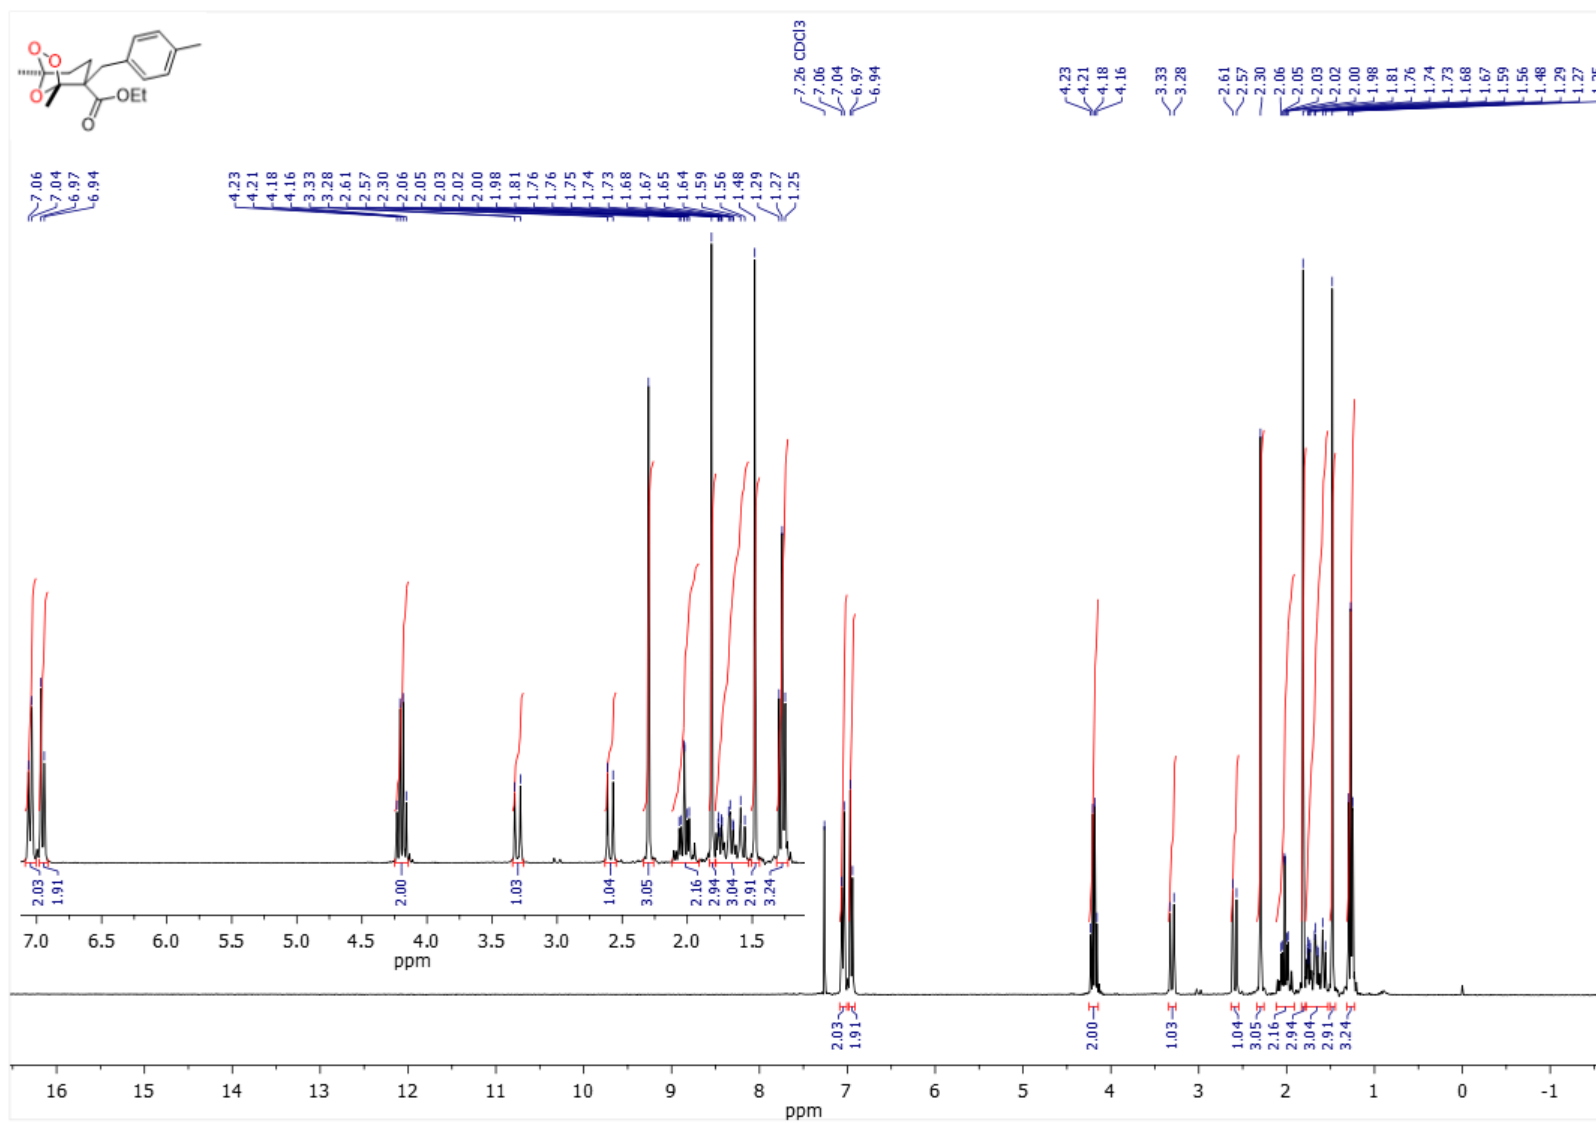

$^{13}\text{C}$  NMR (75.48 MHz,  $\text{CDCl}_3$ ). Ethyl (1R\*,2R\*,5S\*)-1,5-dimethyl-2-(4-methylbenzyl)-6,7,8-trioxabicyclo[3.2.1]octane-2-carboxylate, 2d

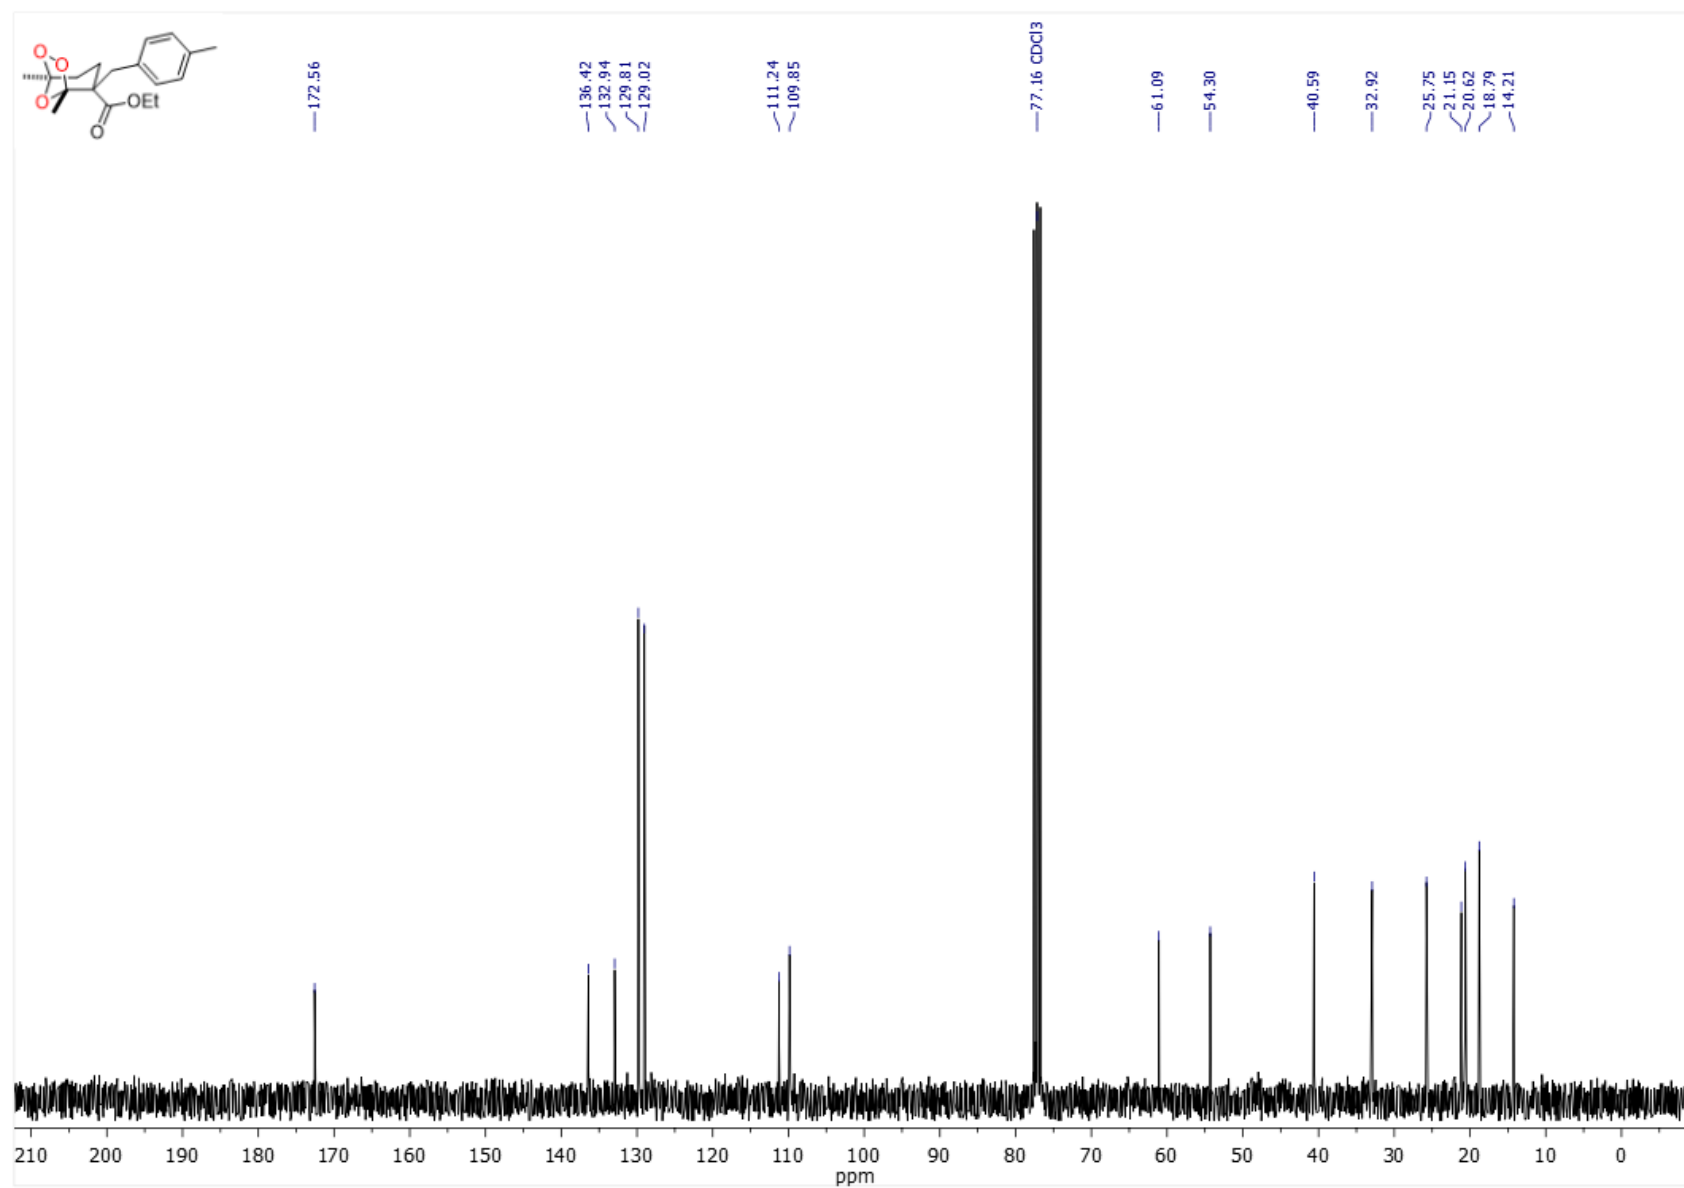

$^1\text{H}$  NMR (300.13 MHz,  $\text{CDCl}_3$ ). Ethyl (1R\*,2S\*,5S\*)-1,5-dimethyl-2-(4-methylbenzyl)-6,7,8-trioxabicyclo[3.2.1]octane-2-carboxylate, 3d

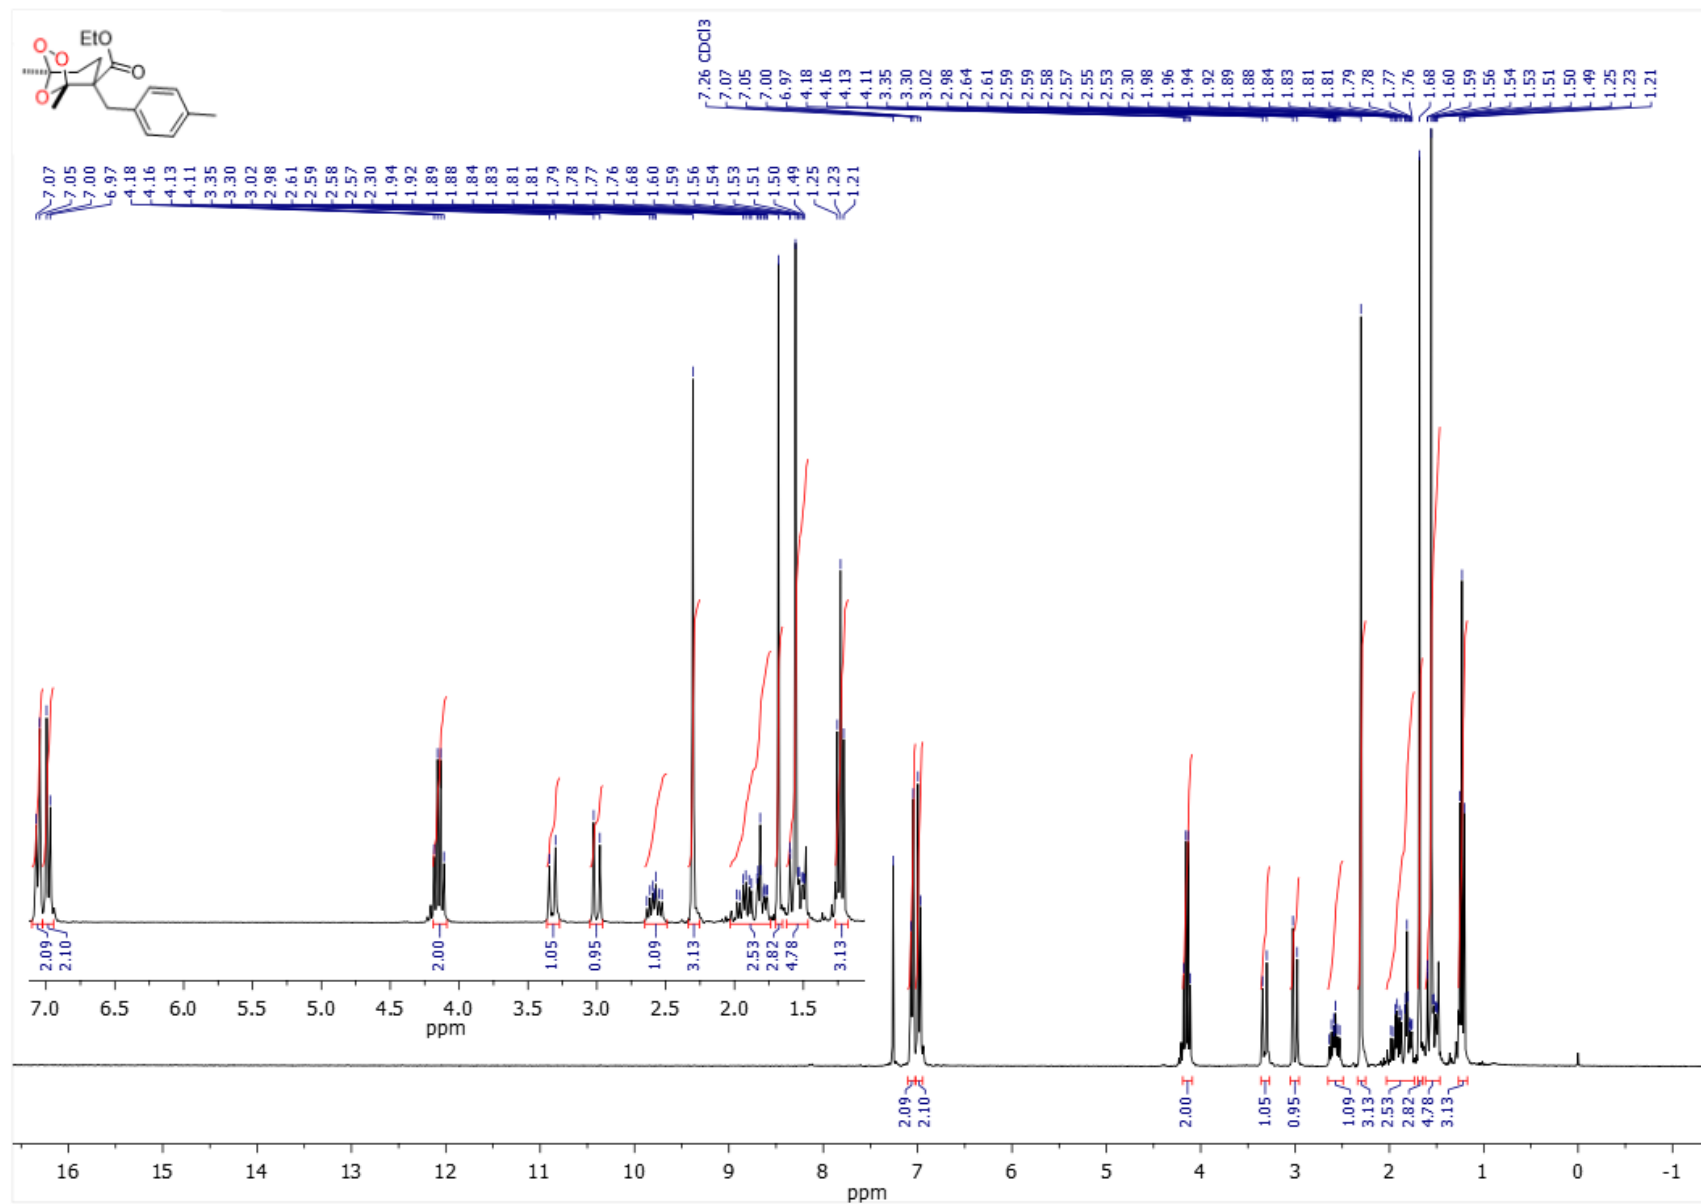



$^{13}\text{C}$  NMR (75.48 MHz,  $\text{CDCl}_3$ ). Ethyl (1R\*,2S\*,5S\*)-1,5-dimethyl-2-(4-methylbenzyl)-6,7,8-trioxabicyclo[3.2.1]octane-2-carboxylate, 3d

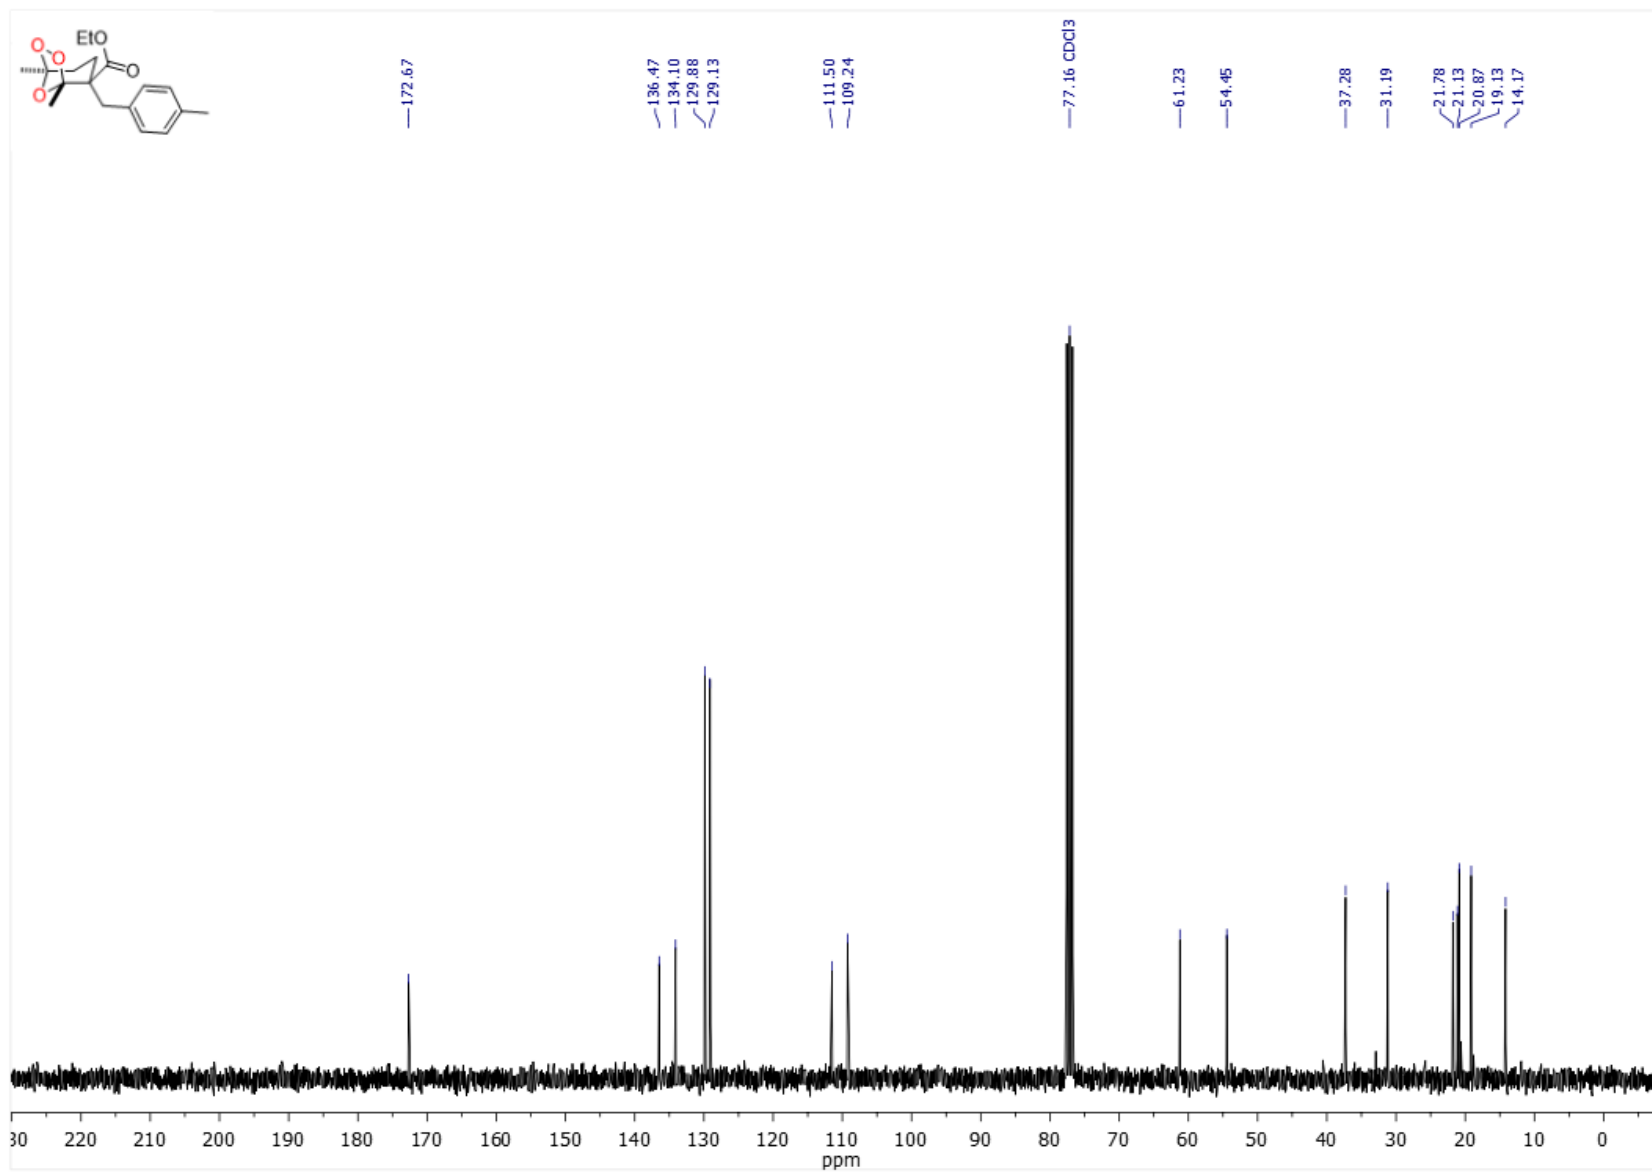

$^1\text{H}$  NMR (300.13 MHz,  $\text{CDCl}_3$ ). Ethyl (1*R*\*,2*S*\*,5*S*\*)-1,5-dimethyl-2-(4-nitrobenzyl)-6,7,8-trioxabicyclo[3.2.1]octane-2-carboxylate, 2e

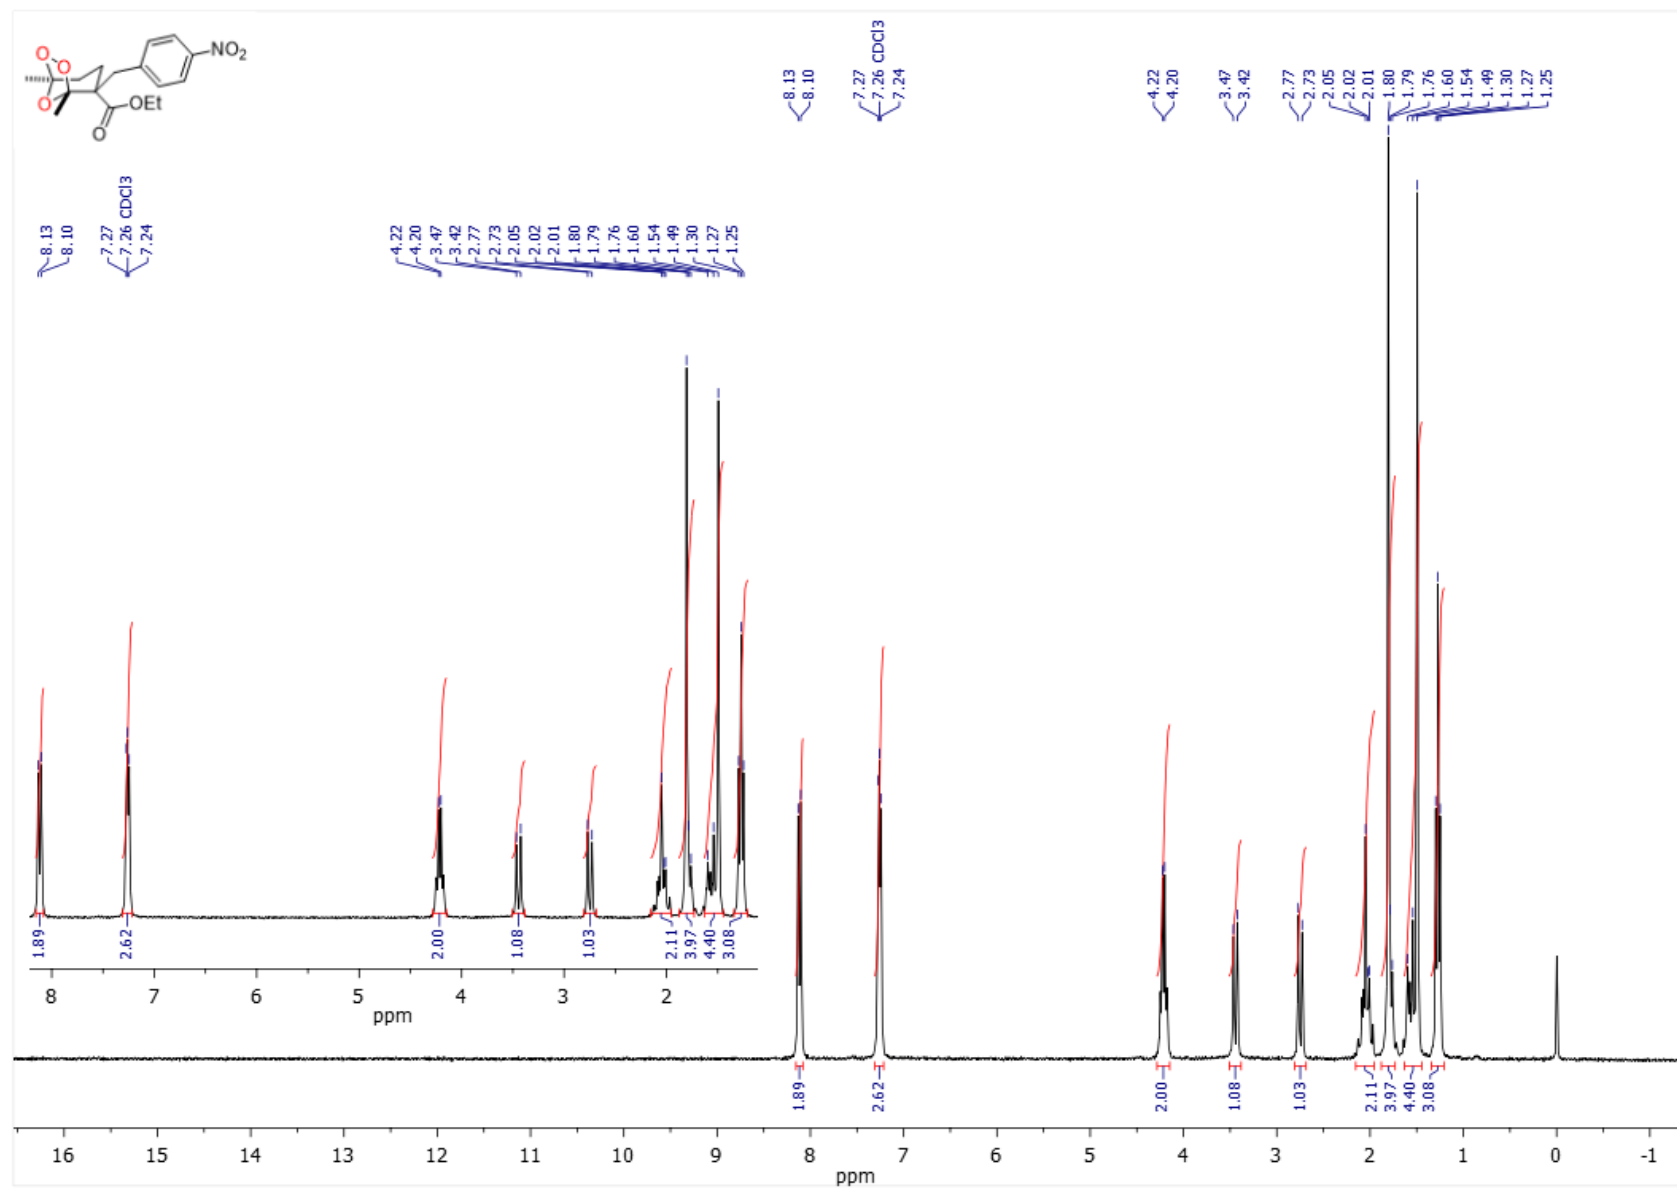

$^{13}\text{C}$  NMR (75.48 MHz,  $\text{CDCl}_3$ ). Ethyl (1*R*\*,2*S*\*,5*S*\*)-1,5-dimethyl-2-(4-nitrobenzyl)-6,7,8-trioxabicyclo[3.2.1]octane-2-carboxylate, 2e

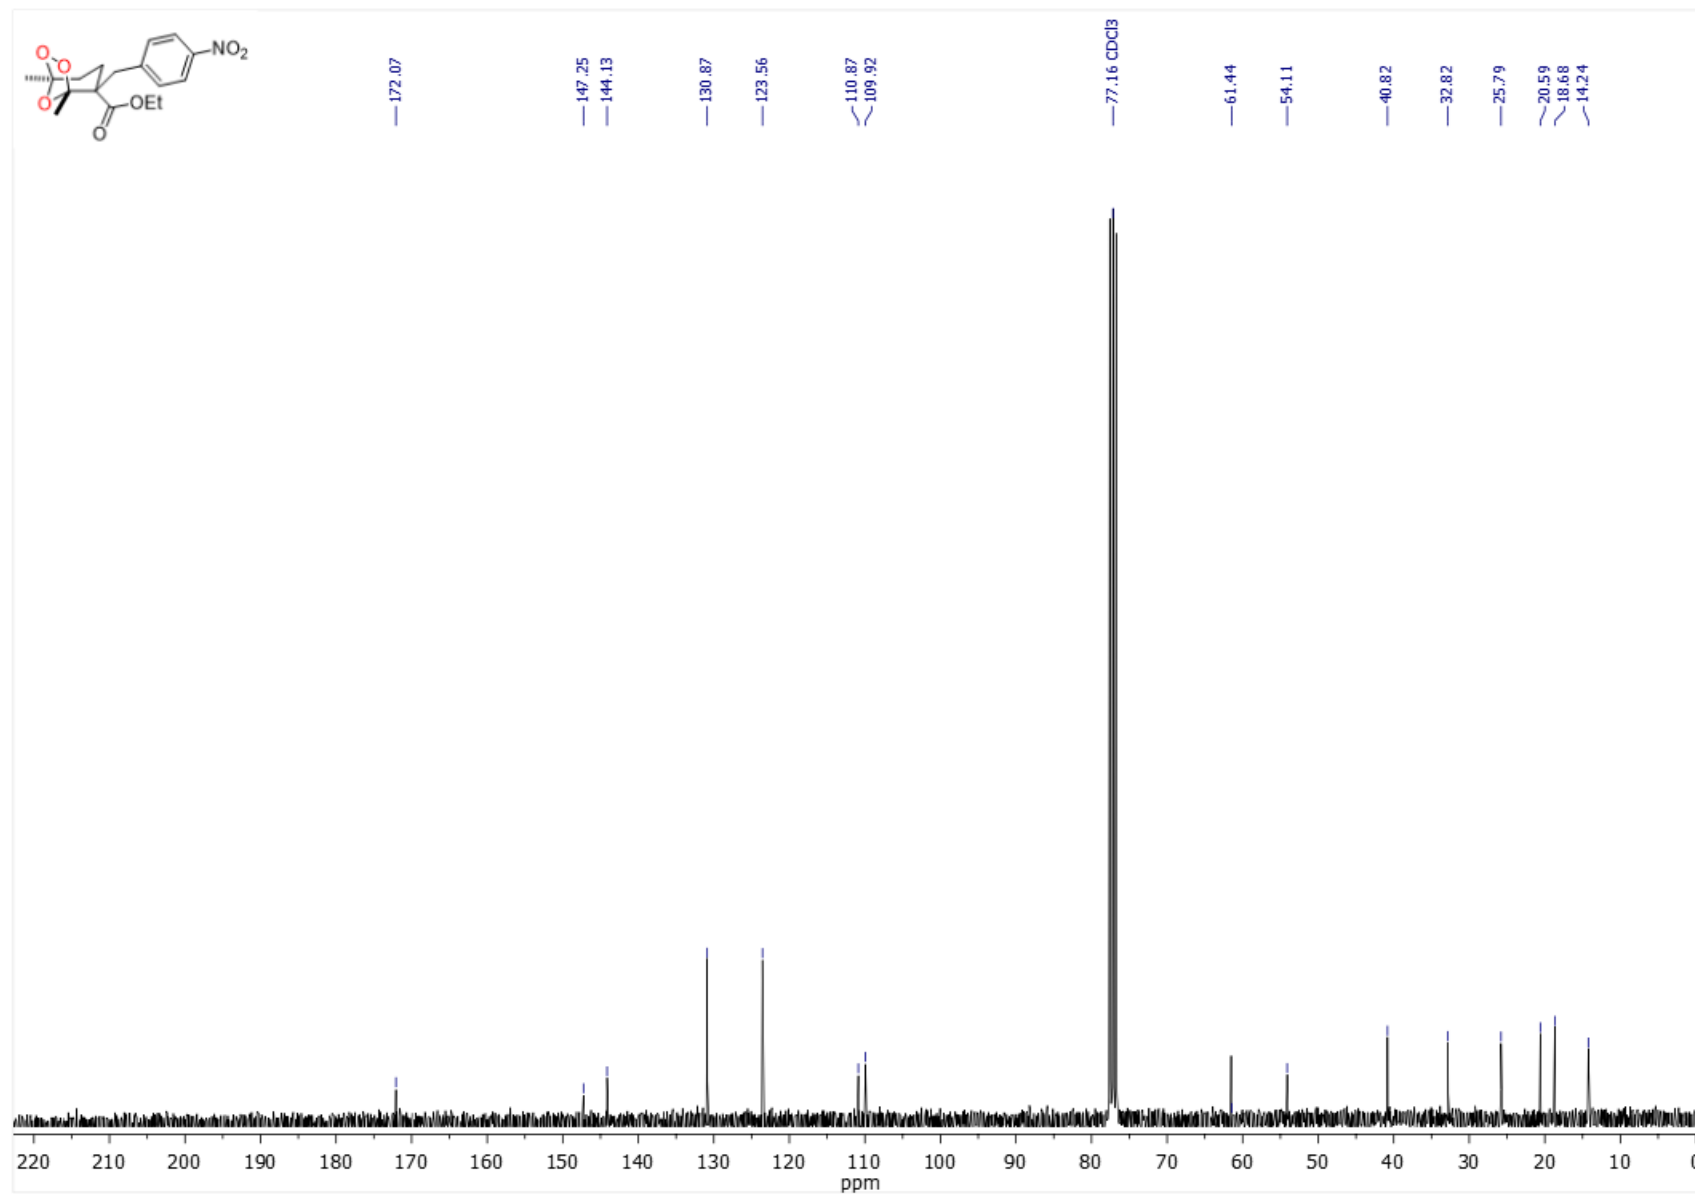

$^1\text{H}$  NMR (300.13 MHz,  $\text{CDCl}_3$ ). Ethyl (1*R*\*,2*S*\*,5*S*\*)-1,5-dimethyl-2-(4-nitrobenzyl)-6,7,8-trioxabicyclo[3.2.1]octane-2-carboxylate, 3e

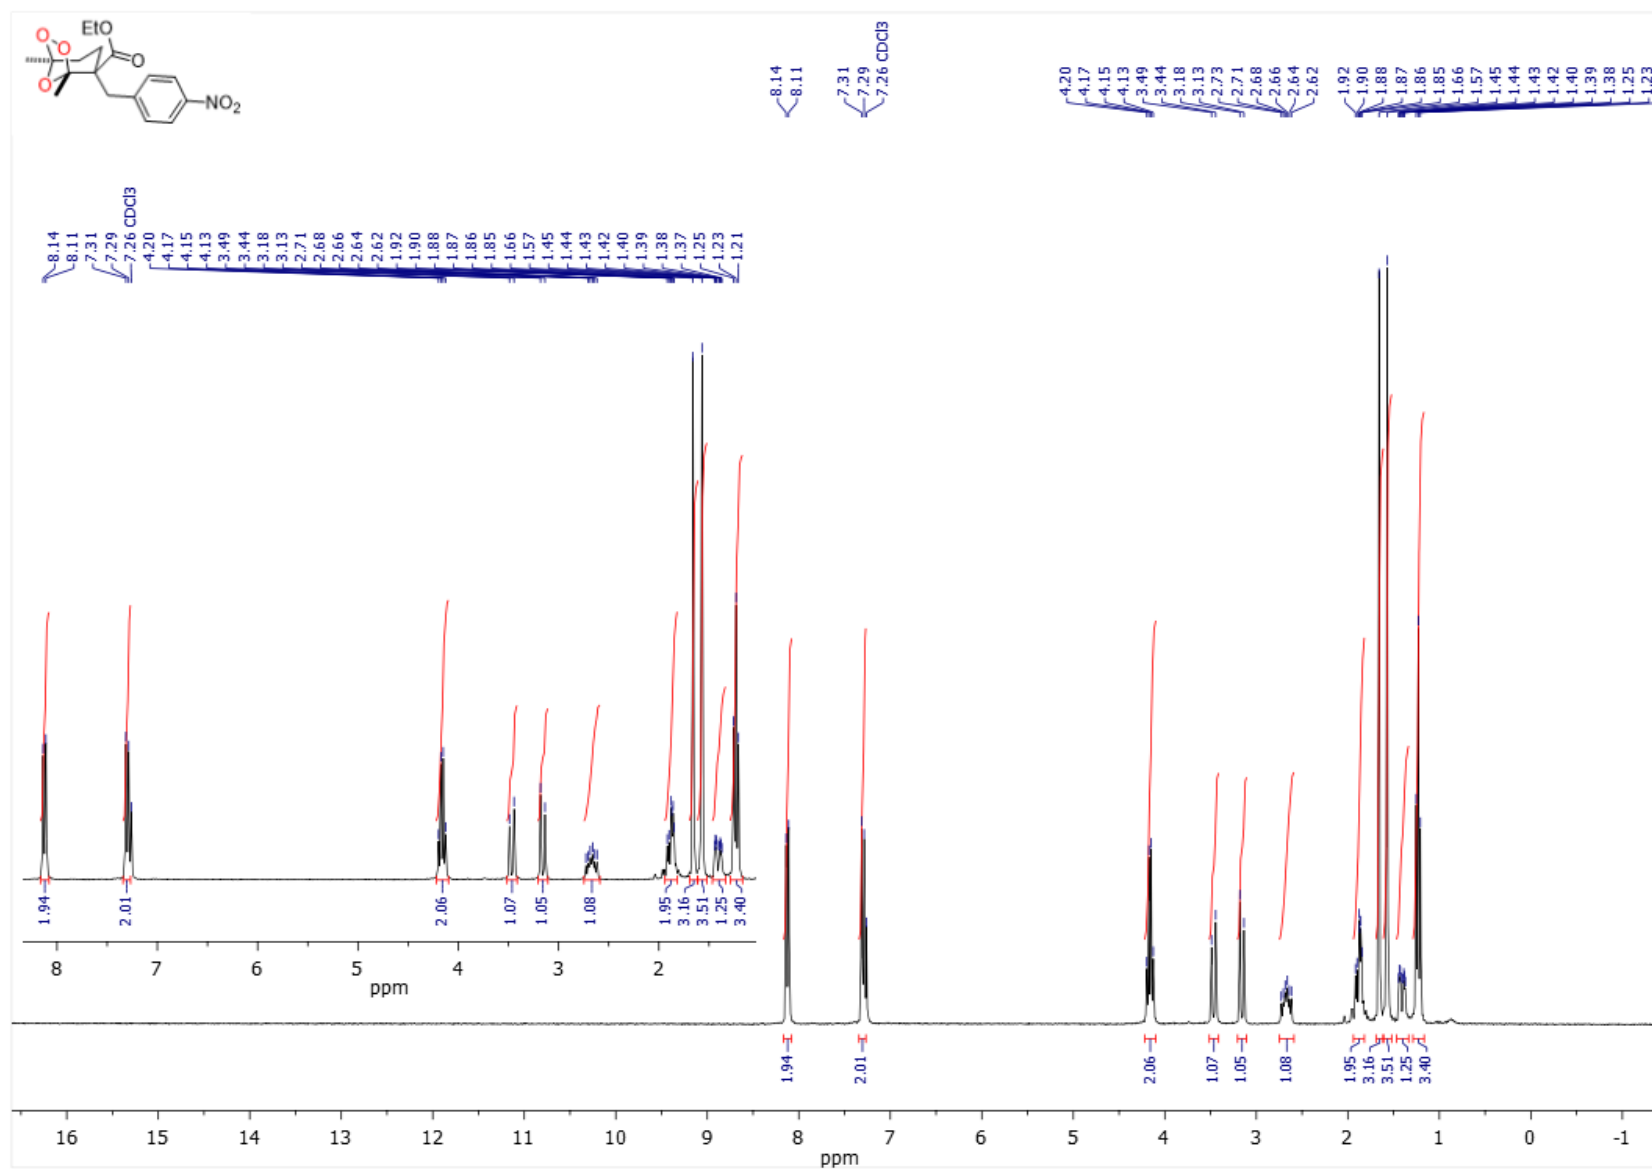

$^{13}\text{C}$  NMR (75.48 MHz,  $\text{CDCl}_3$ ). Ethyl (1*R*\*,2*S*\*,5*S*\*)-1,5-dimethyl-2-(4-nitrobenzyl)-6,7,8-trioxabicyclo[3.2.1]octane-2-carboxylate, 3e

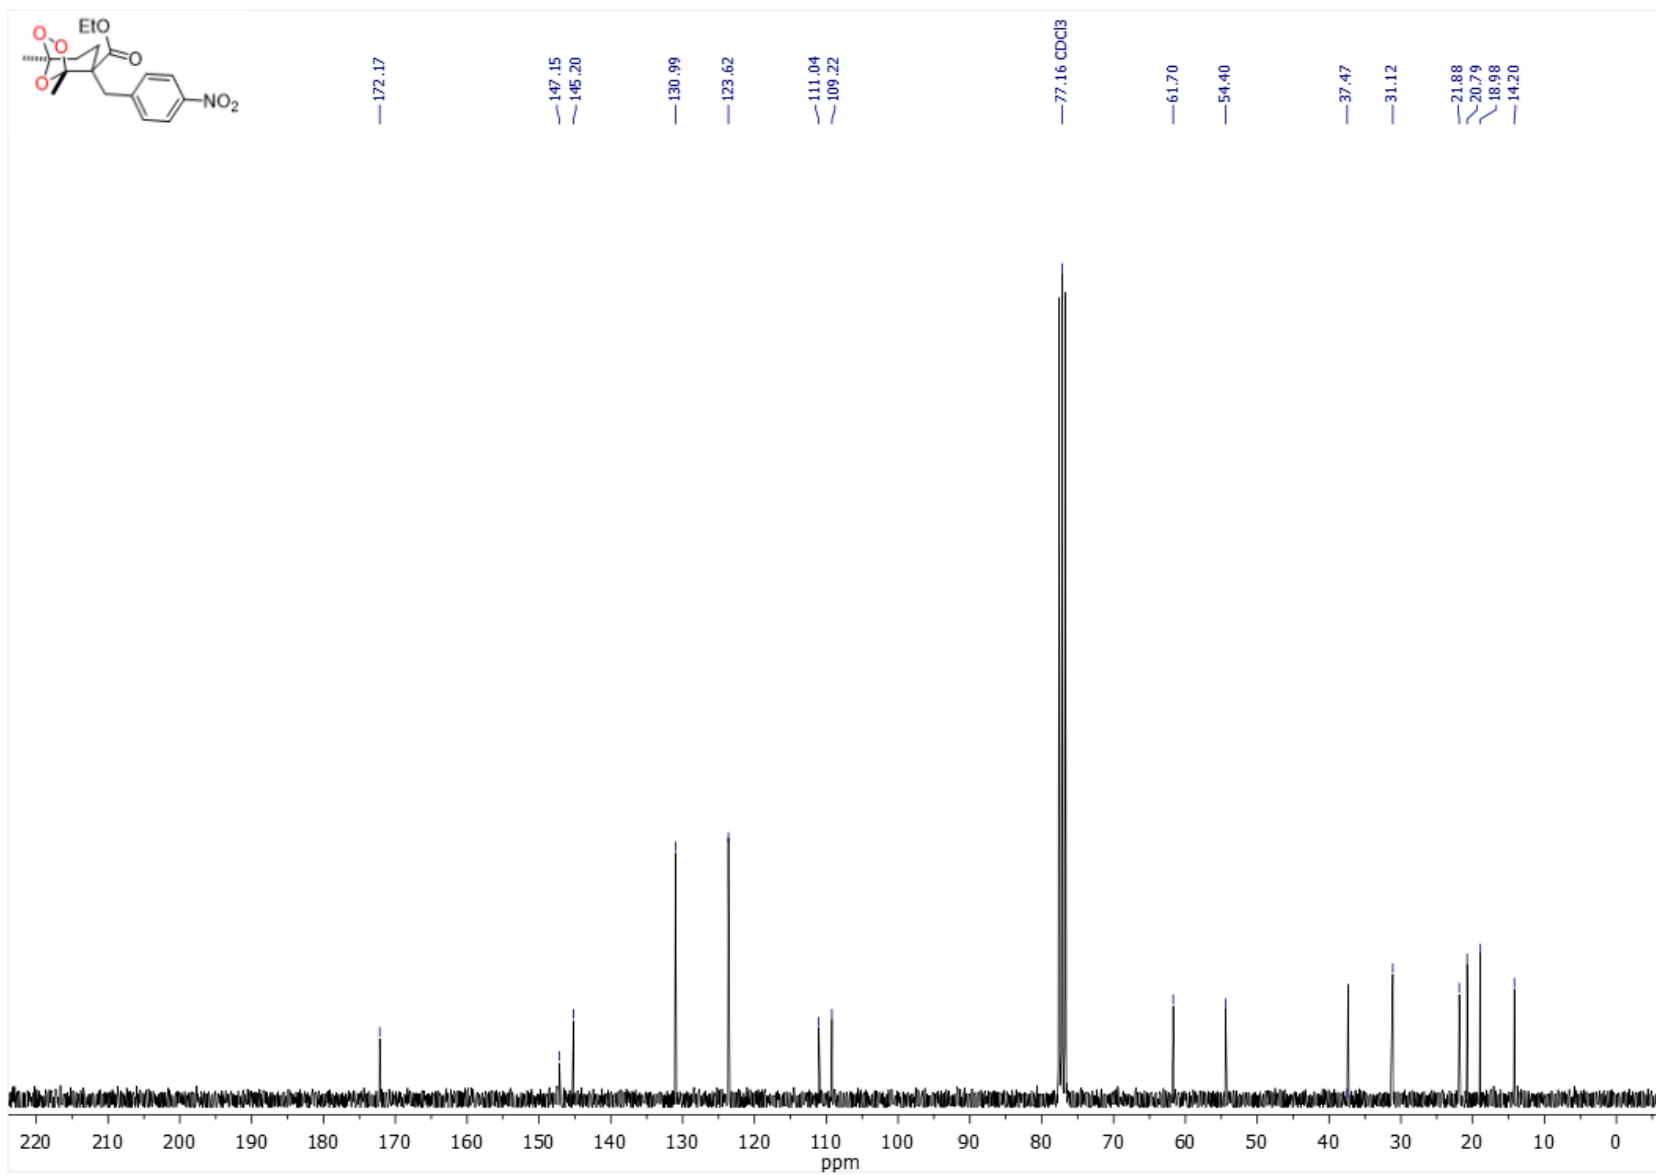

$^1\text{H}$  NMR (300.13 MHz,  $\text{CDCl}_3$ ). Ethyl (1*R*\*,2*S*\*,5*S*\*)-1,5-dimethyl-6,7,8-trioxabicyclo[3.2.1]octane-2-carboxylate, 2f

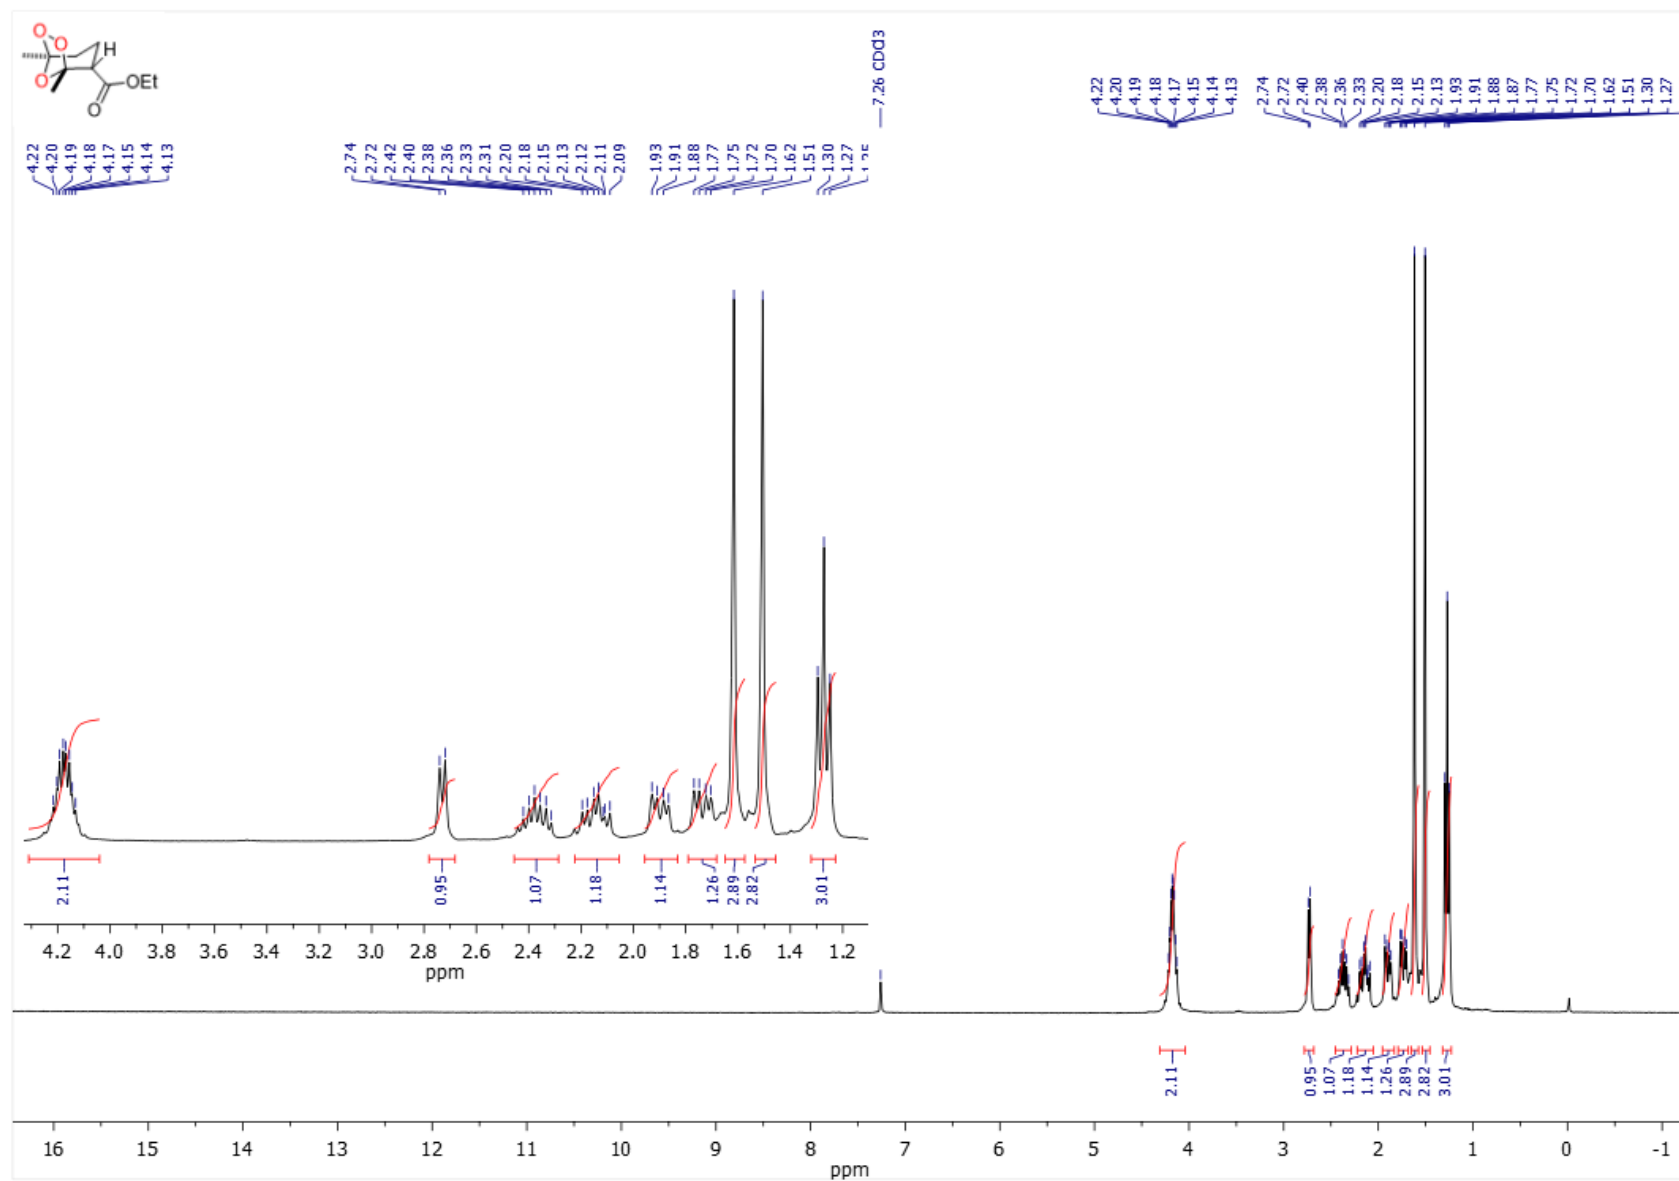

$^{13}\text{C}$  NMR (75.48 MHz,  $\text{CDCl}_3$ ). Ethyl (1*R*\*,2*S*\*,5*S*\*)-1,5-dimethyl-6,7,8-trioxabicyclo[3.2.1]octane-2-carboxylate, 2f

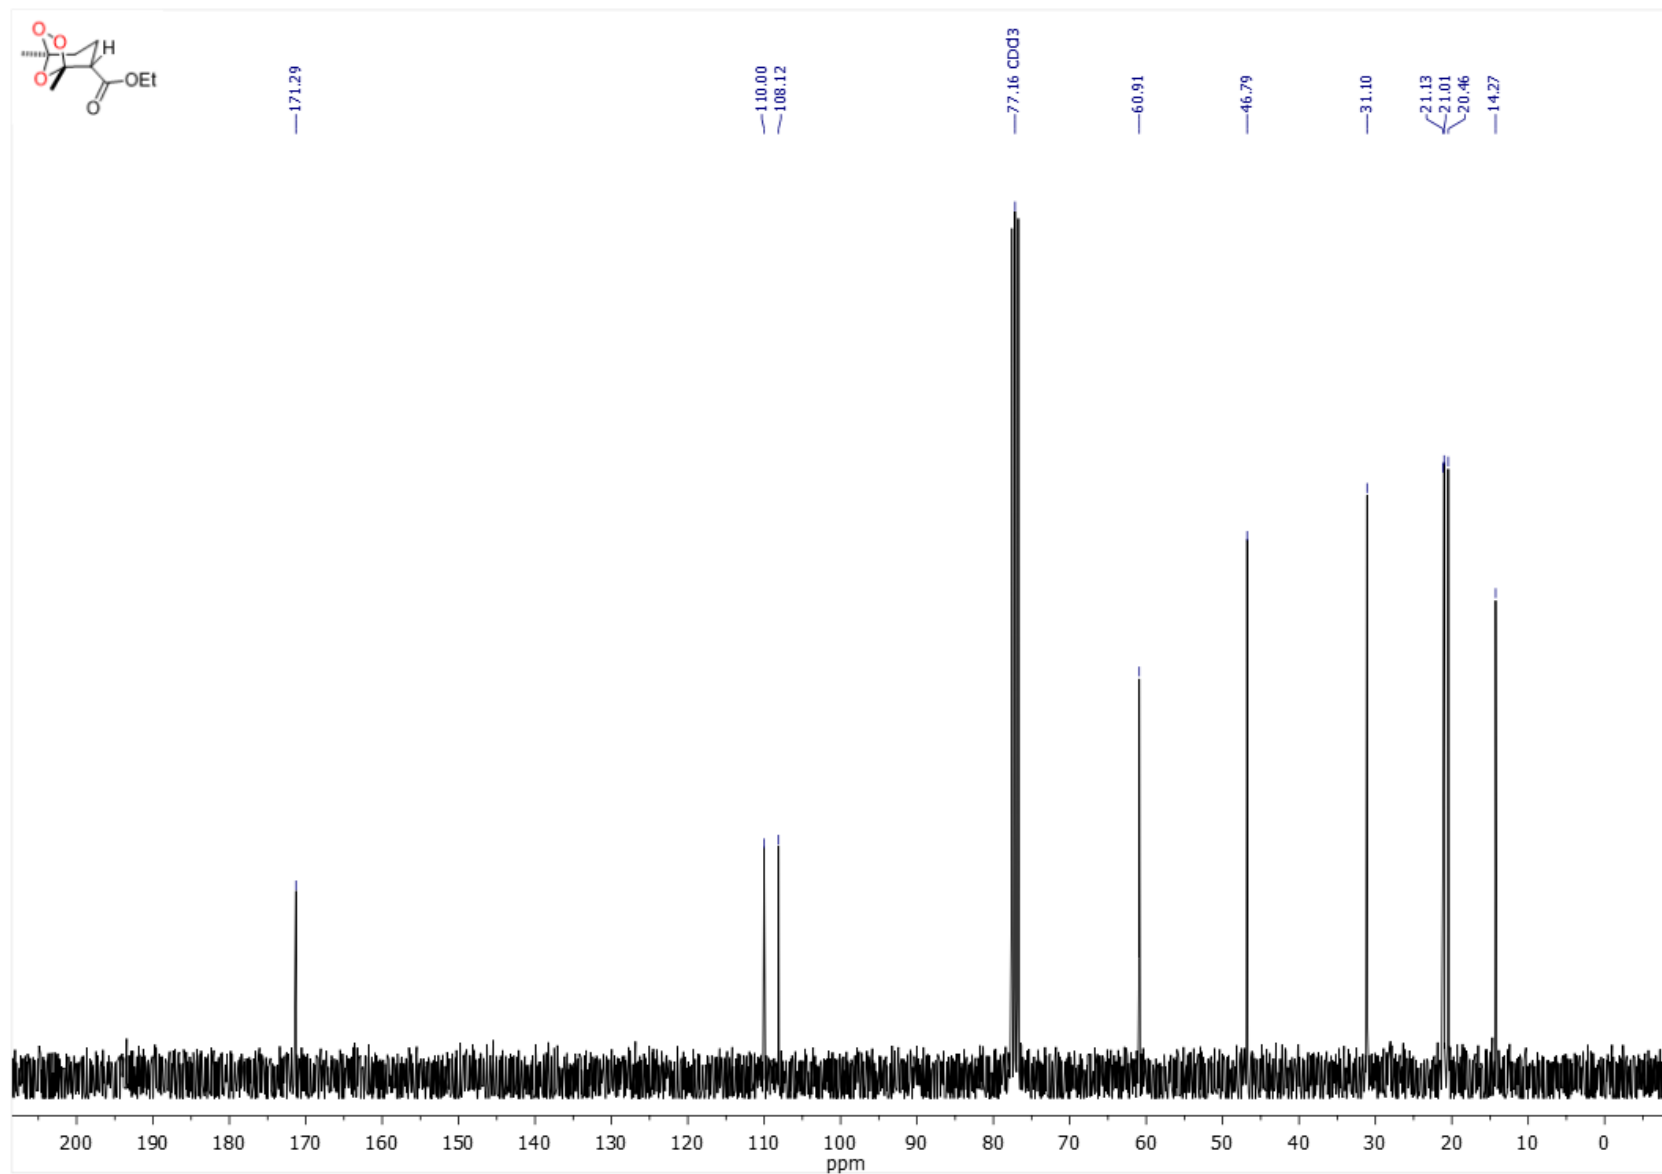

$^1\text{H}$  NMR (300.13 MHz,  $\text{CDCl}_3$ ). Ethyl (1*R*\*,2*R*\*,5*S*\*)-1,5-dimethyl-6,7,8-trioxabicyclo[3.2.1]octane-2-carboxylate, 3f

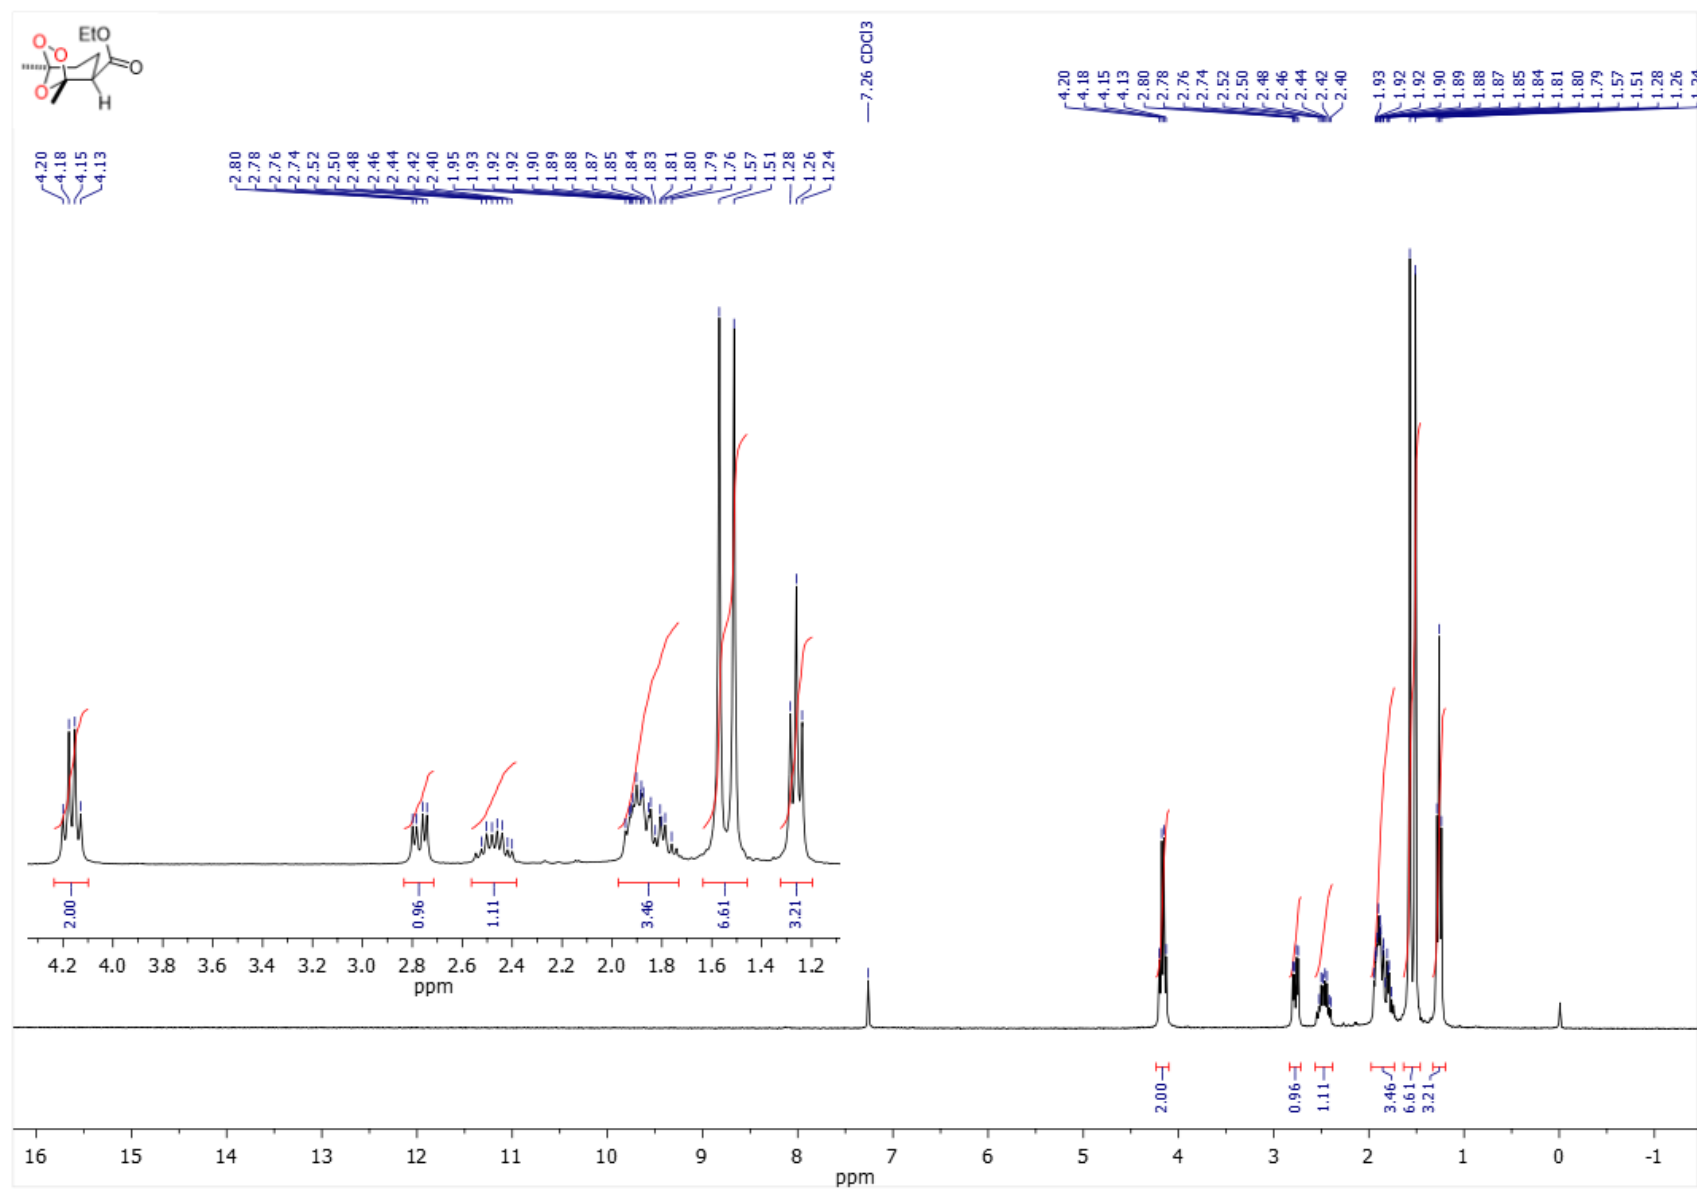



$^{13}\text{C}$  NMR (75.48 MHz,  $\text{CDCl}_3$ ). Ethyl (1*R*\*,2*R*\*,5*S*\*)-1,5-dimethyl-6,7,8-trioxabicyclo[3.2.1]octane-2-carboxylate, 3f

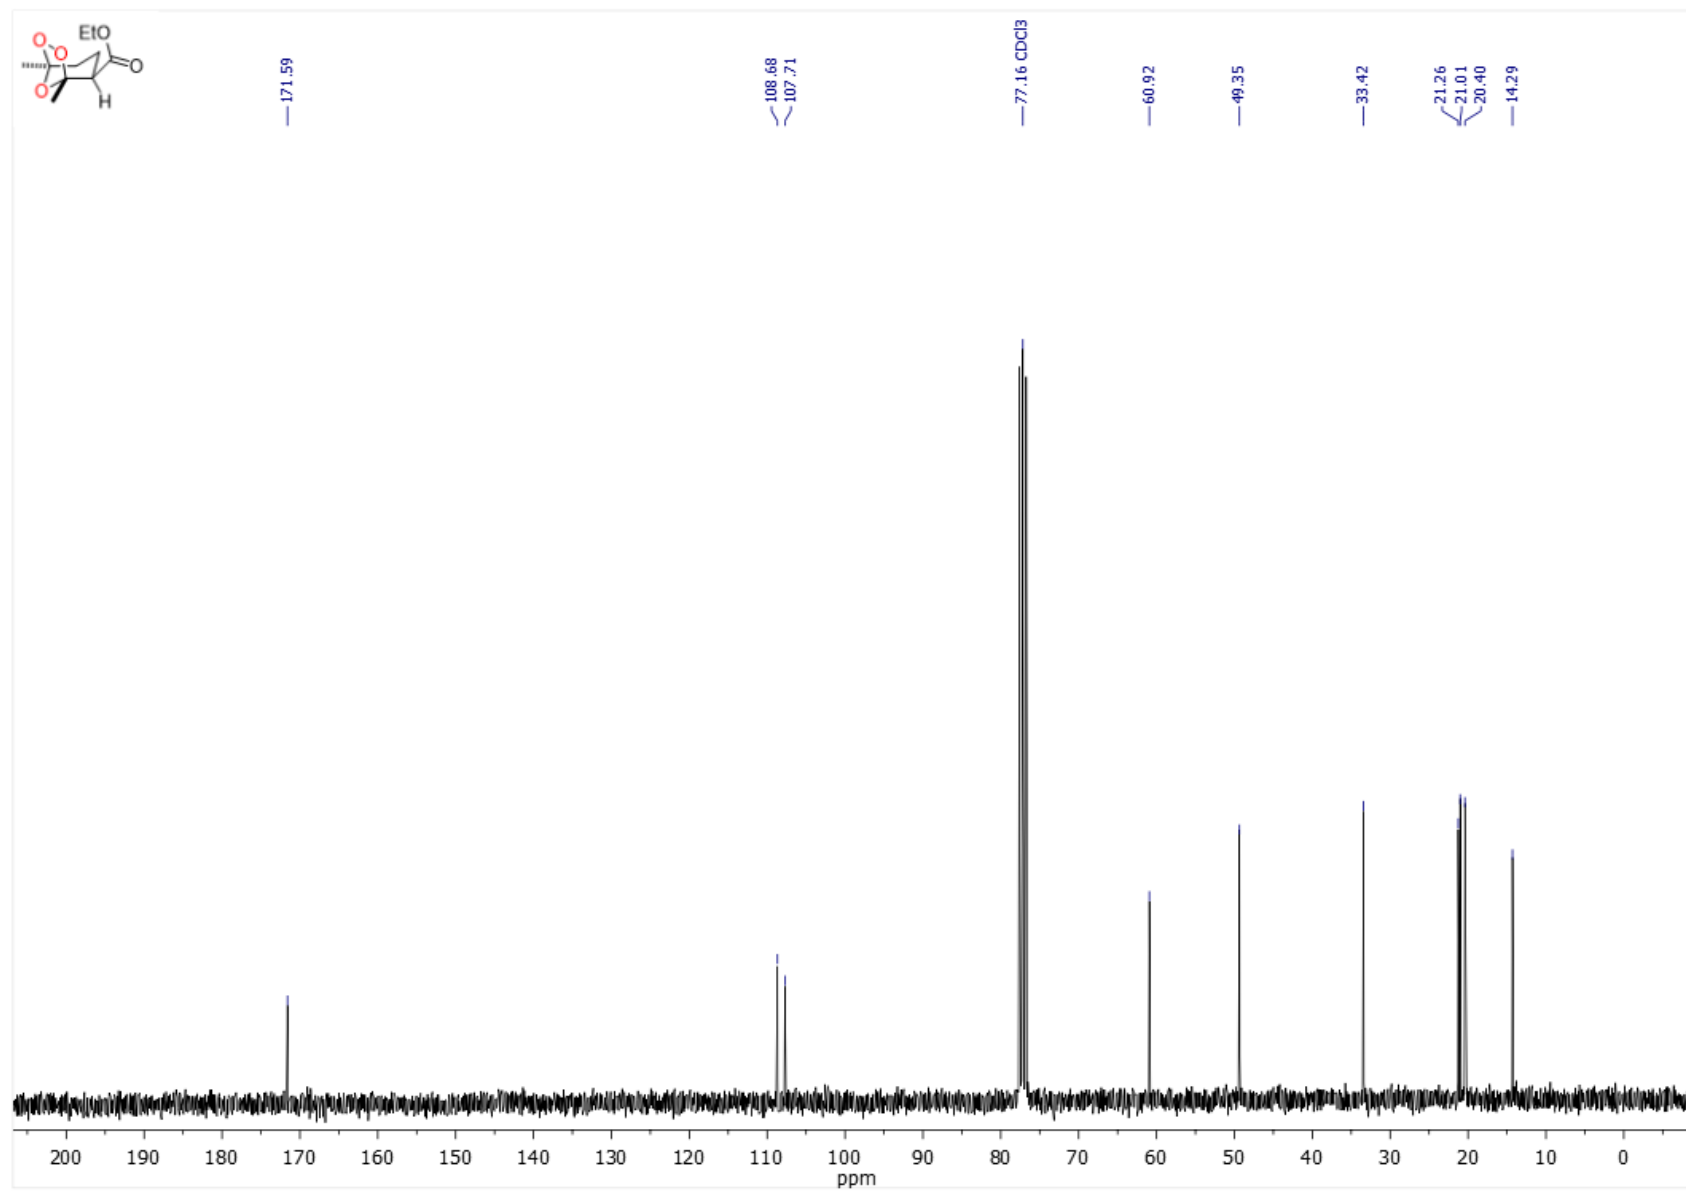

$^1\text{H}$  NMR (300.13 MHz,  $\text{CDCl}_3$ ). Ethyl (1*R*\*,2*S*\*,5*S*\*)-2-ethyl-1,5-dimethyl-6,7,8-trioxabicyclo[3.2.1]octane-2-carboxylate, 2g

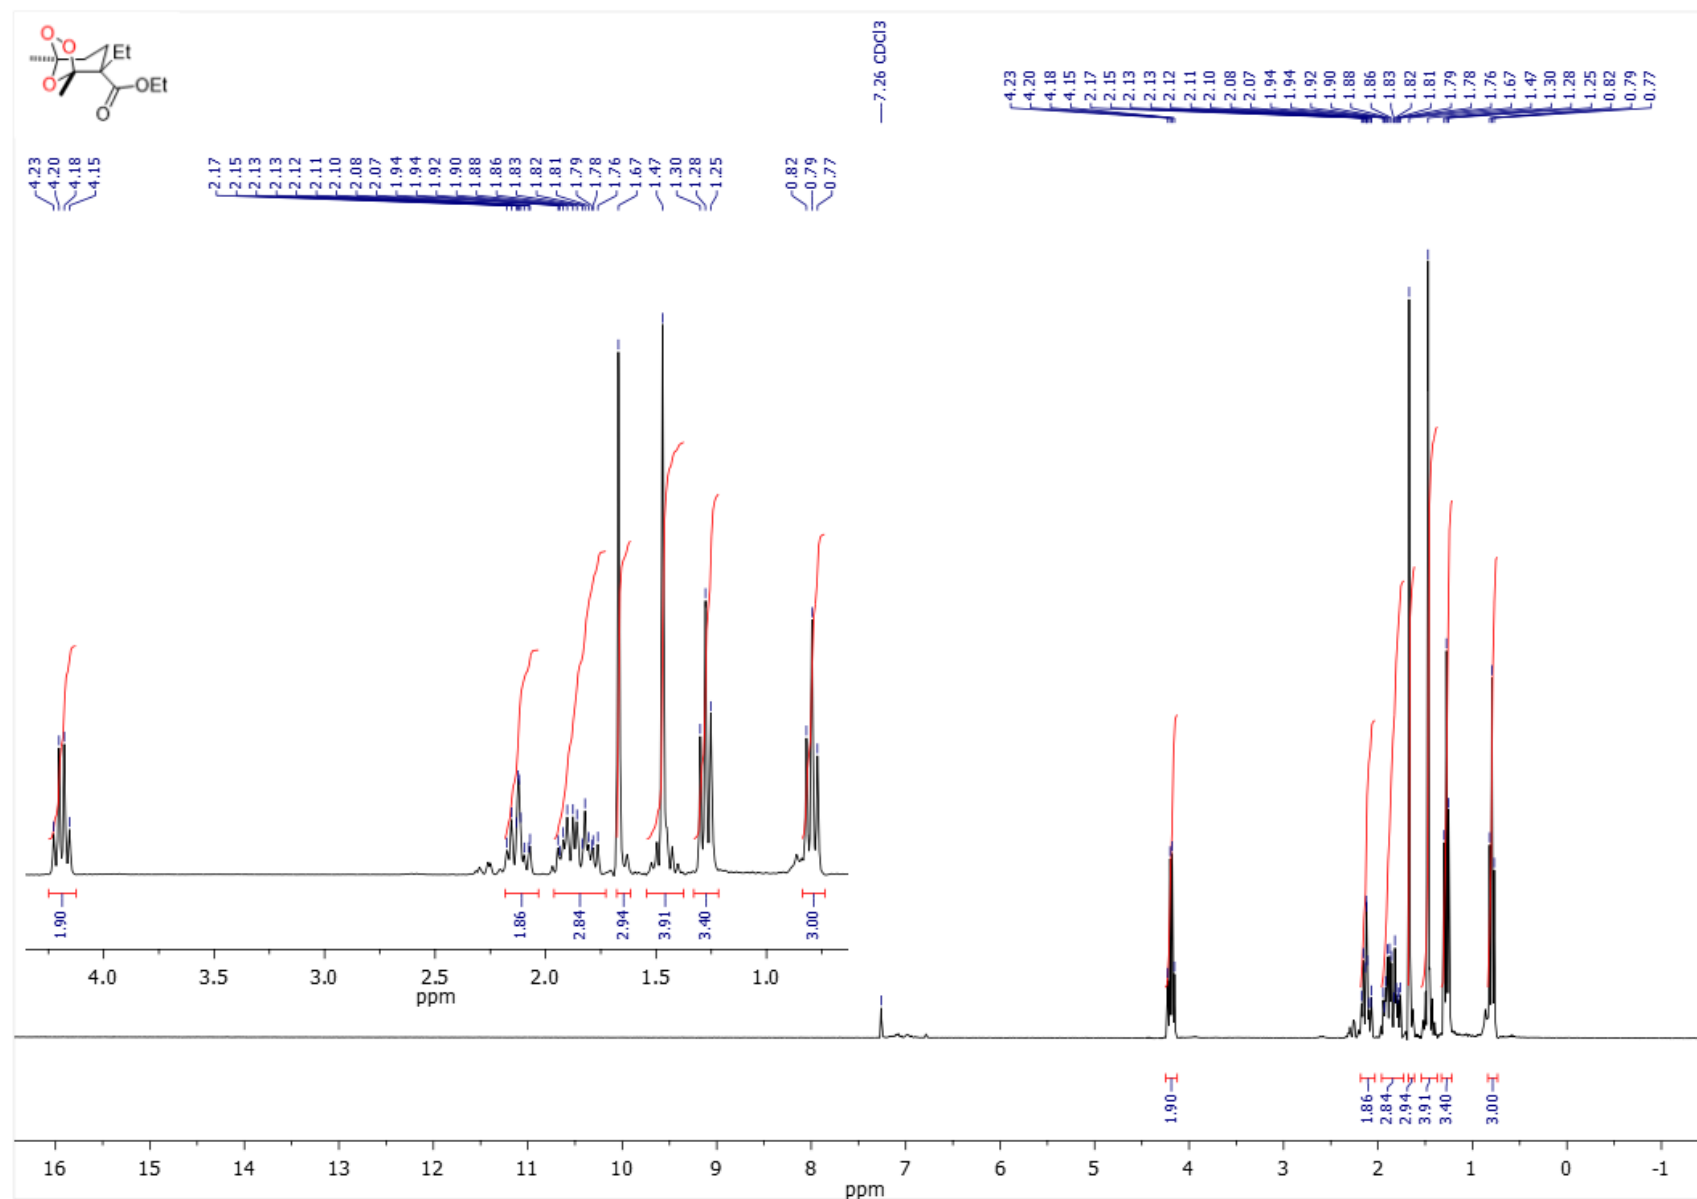

$^{13}\text{C}$  NMR (75.48 MHz,  $\text{CDCl}_3$ ). Ethyl (1*R*\*,2*S*\*,5*S*\*)-2-ethyl-1,5-dimethyl-6,7,8-trioxabicyclo[3.2.1]octane-2-carboxylate, 2g

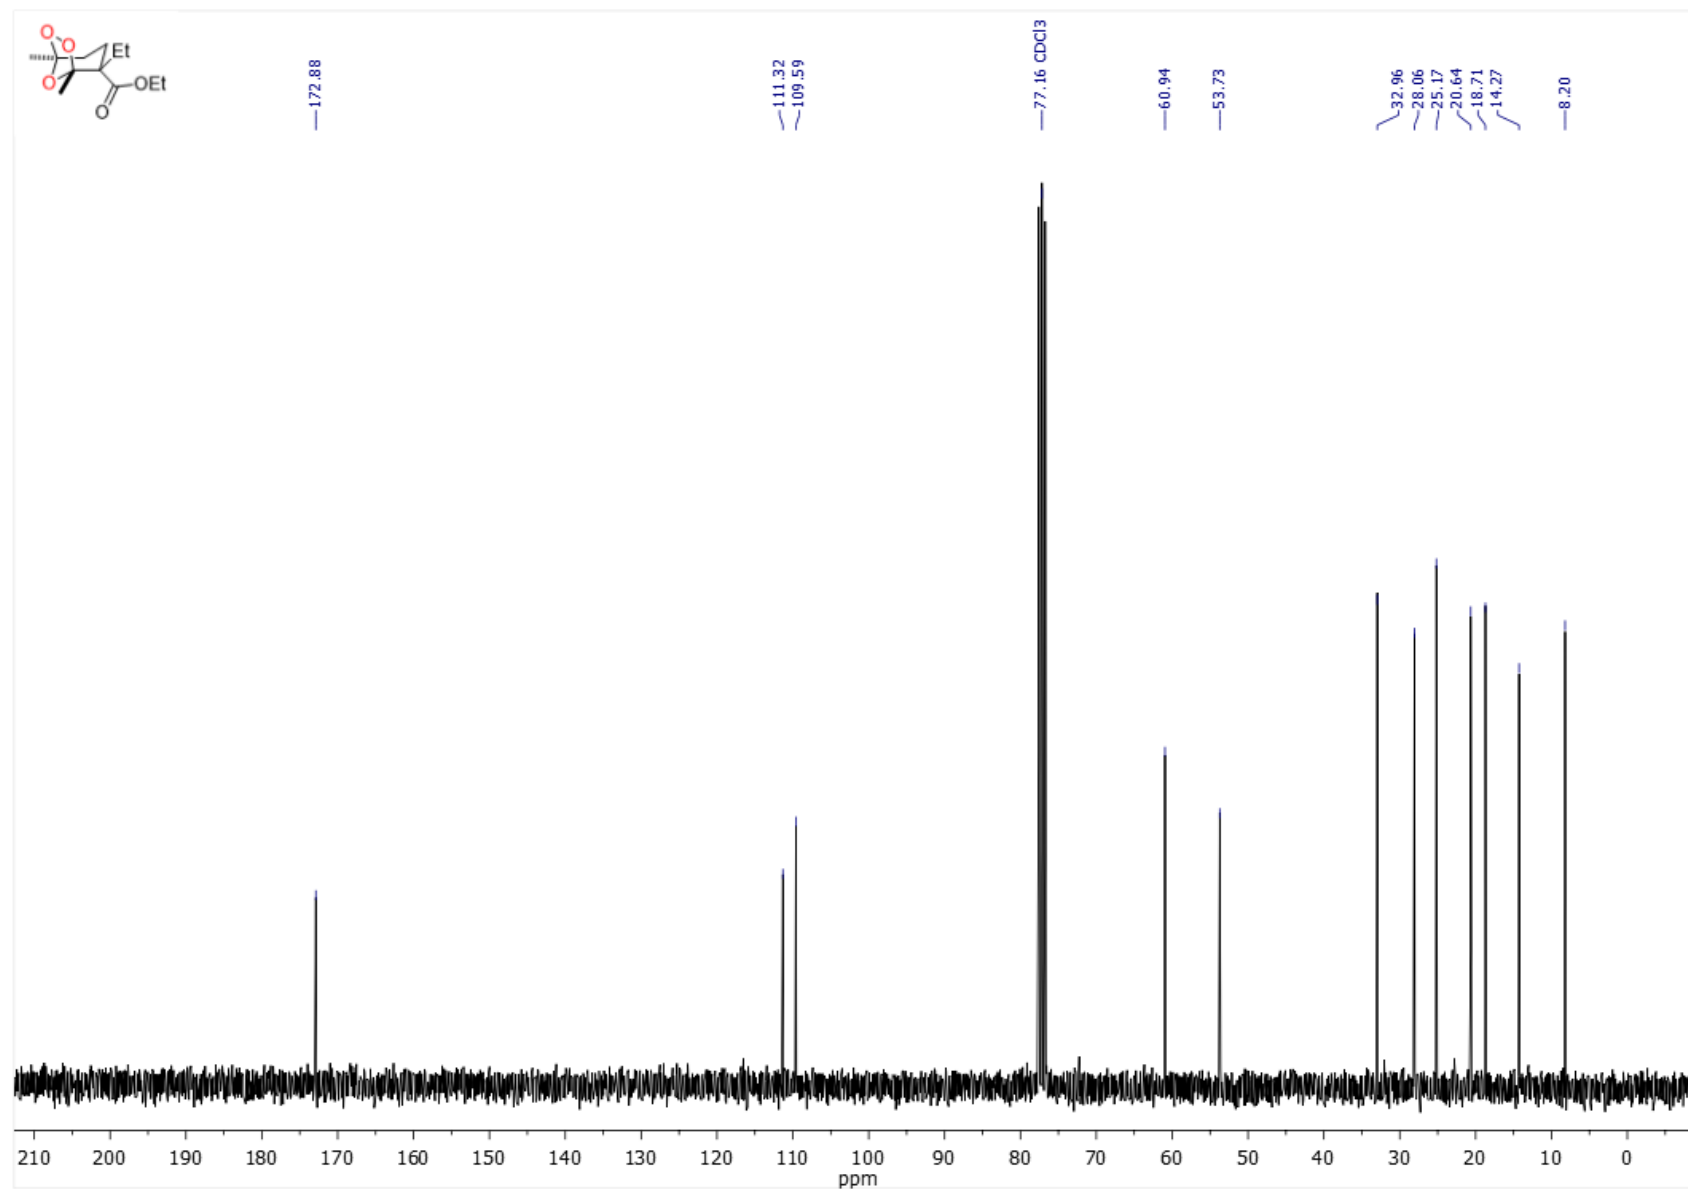

$^1\text{H}$  NMR (300.13 MHz,  $\text{CDCl}_3$ ). Ethyl (1*R*\*,2*R*\*,5*S*\*)-2-ethyl-1,5-dimethyl-6,7,8-trioxabicyclo[3.2.1]octane-2-carboxylate, 3g

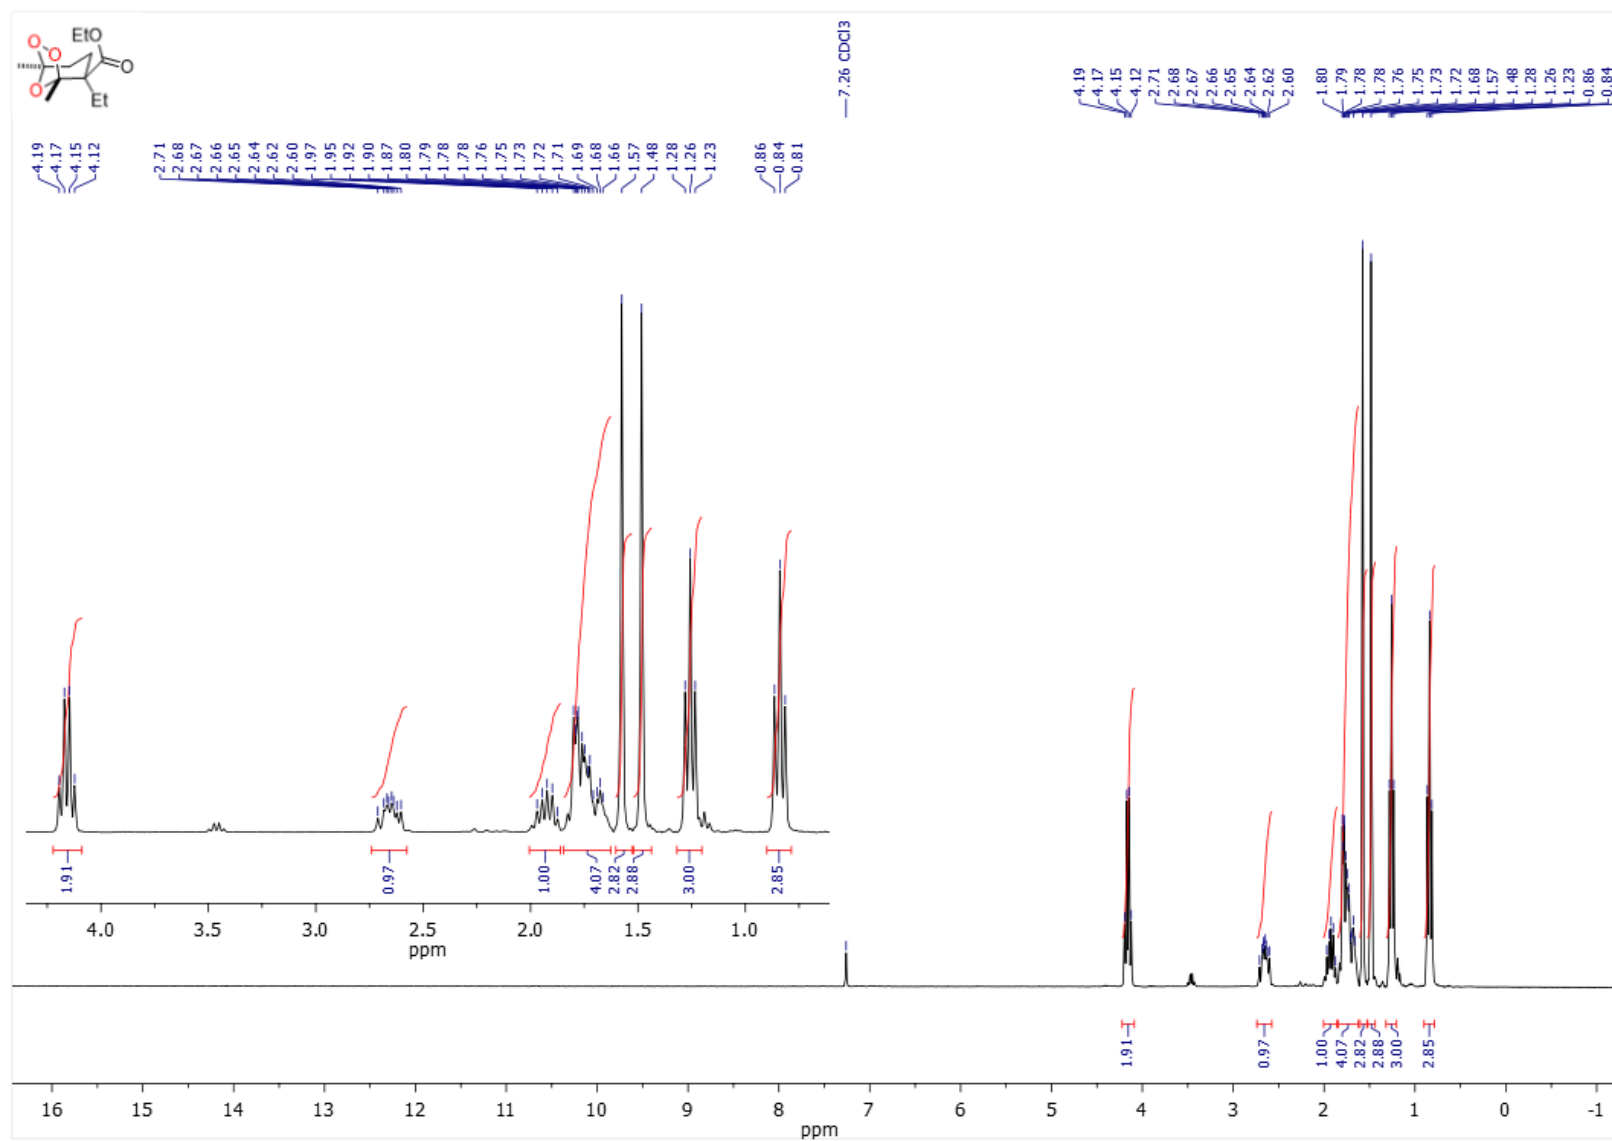

$^{13}\text{C}$  NMR (75.48 MHz,  $\text{CDCl}_3$ ). Ethyl (1*R*\*,2*R*\*,5*S*\*)-2-ethyl-1,5-dimethyl-6,7,8-trioxabicyclo[3.2.1]octane-2-carboxylate, 3g

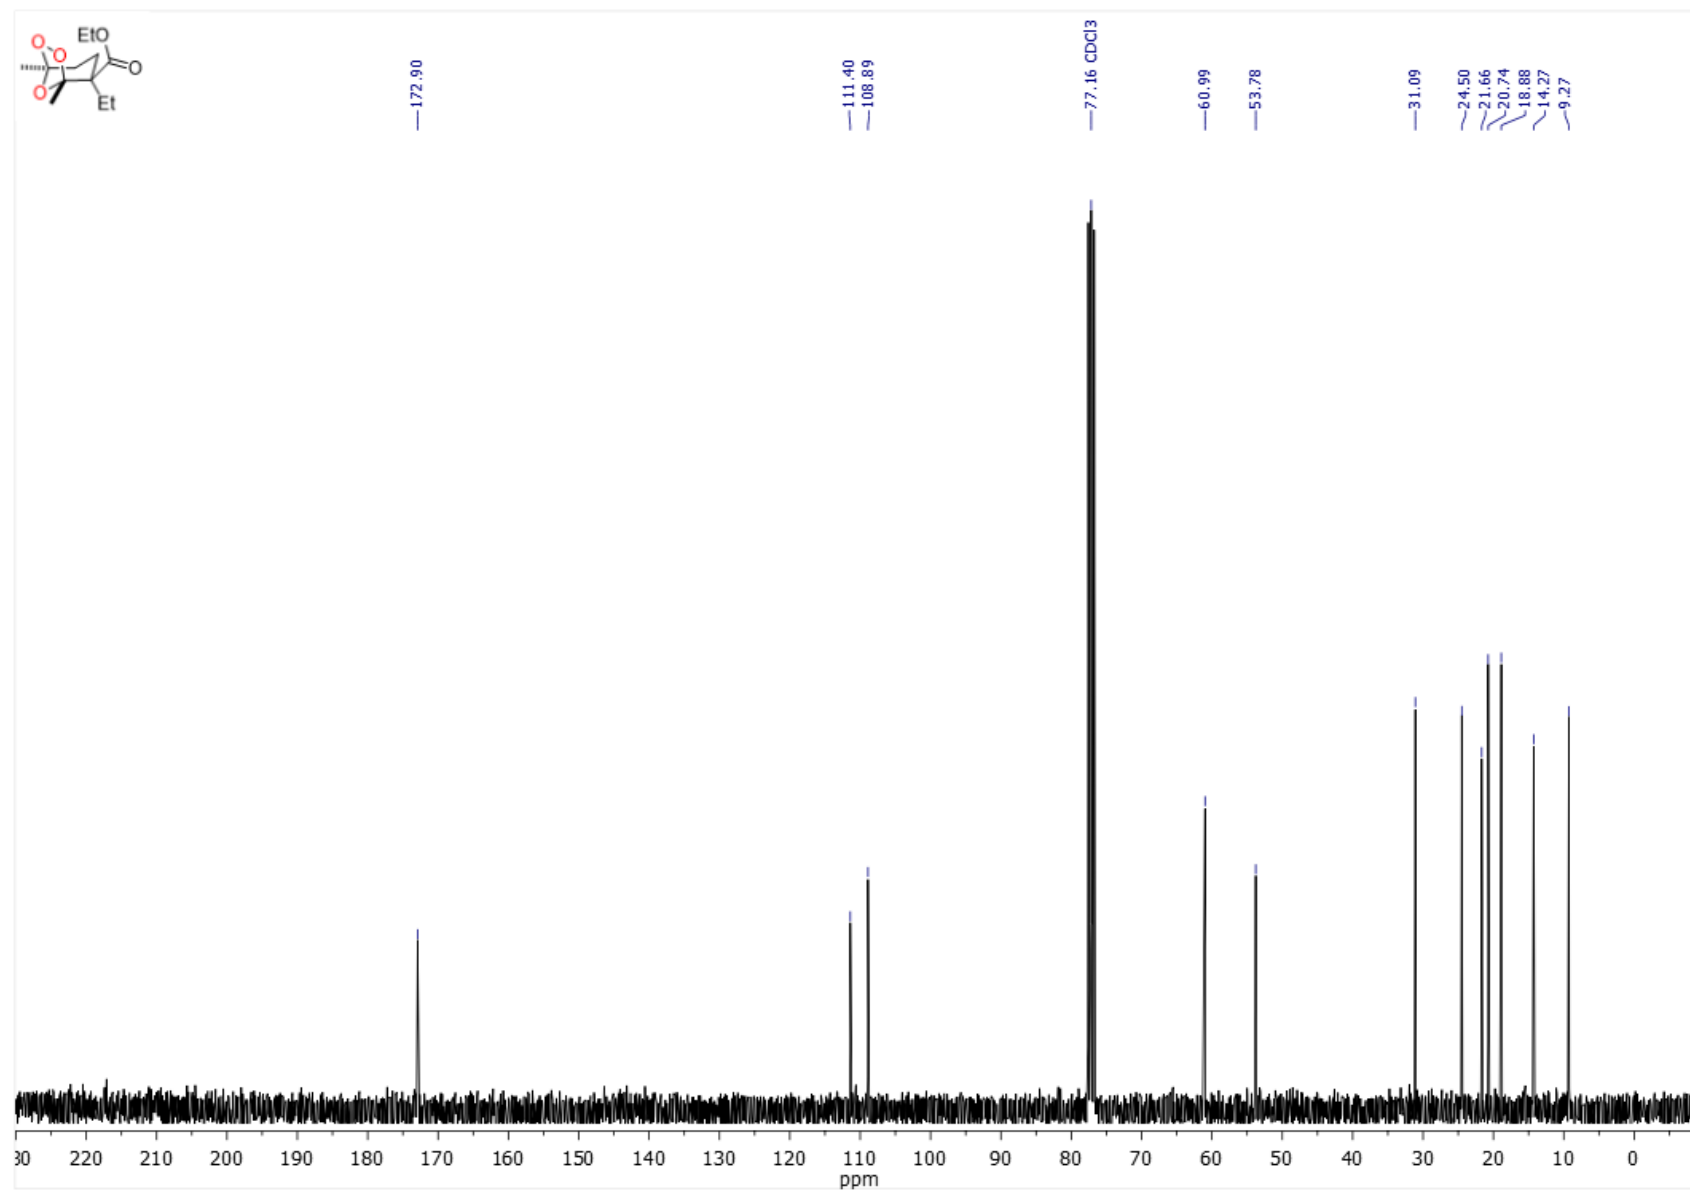

$^1\text{H}$  NMR (300.13 MHz,  $\text{CDCl}_3$ ). Ethyl (1*R*\*,2*S*\*,5*S*\*)-2-butyl-1,5-dimethyl-6,7,8-trioxabicyclo[3.2.1]octane-2-carboxylate, 2h

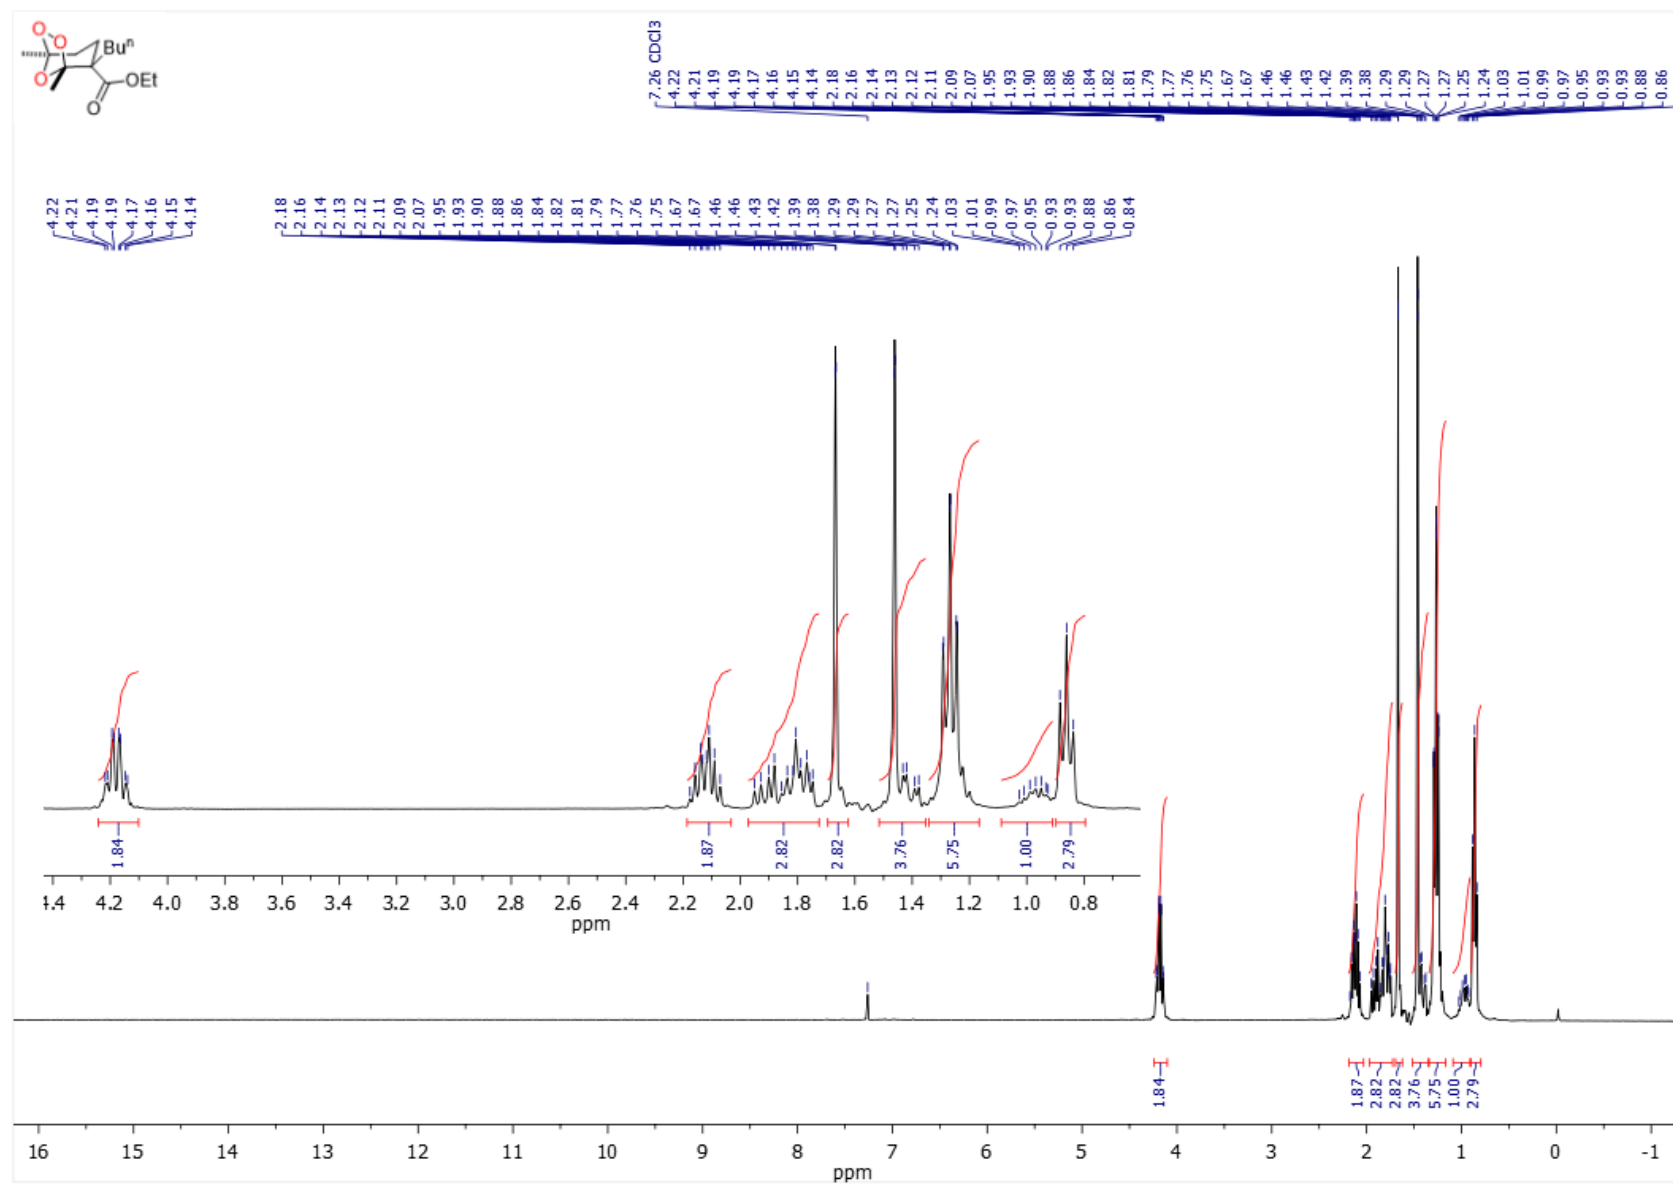

$^{13}\text{C}$  NMR (75.48 MHz,  $\text{CDCl}_3$ ). Ethyl (1*R*\*,2*S*\*,5*S*\*)-2-butyl-1,5-dimethyl-6,7,8-trioxabicyclo[3.2.1]octane-2-carboxylate, 2h

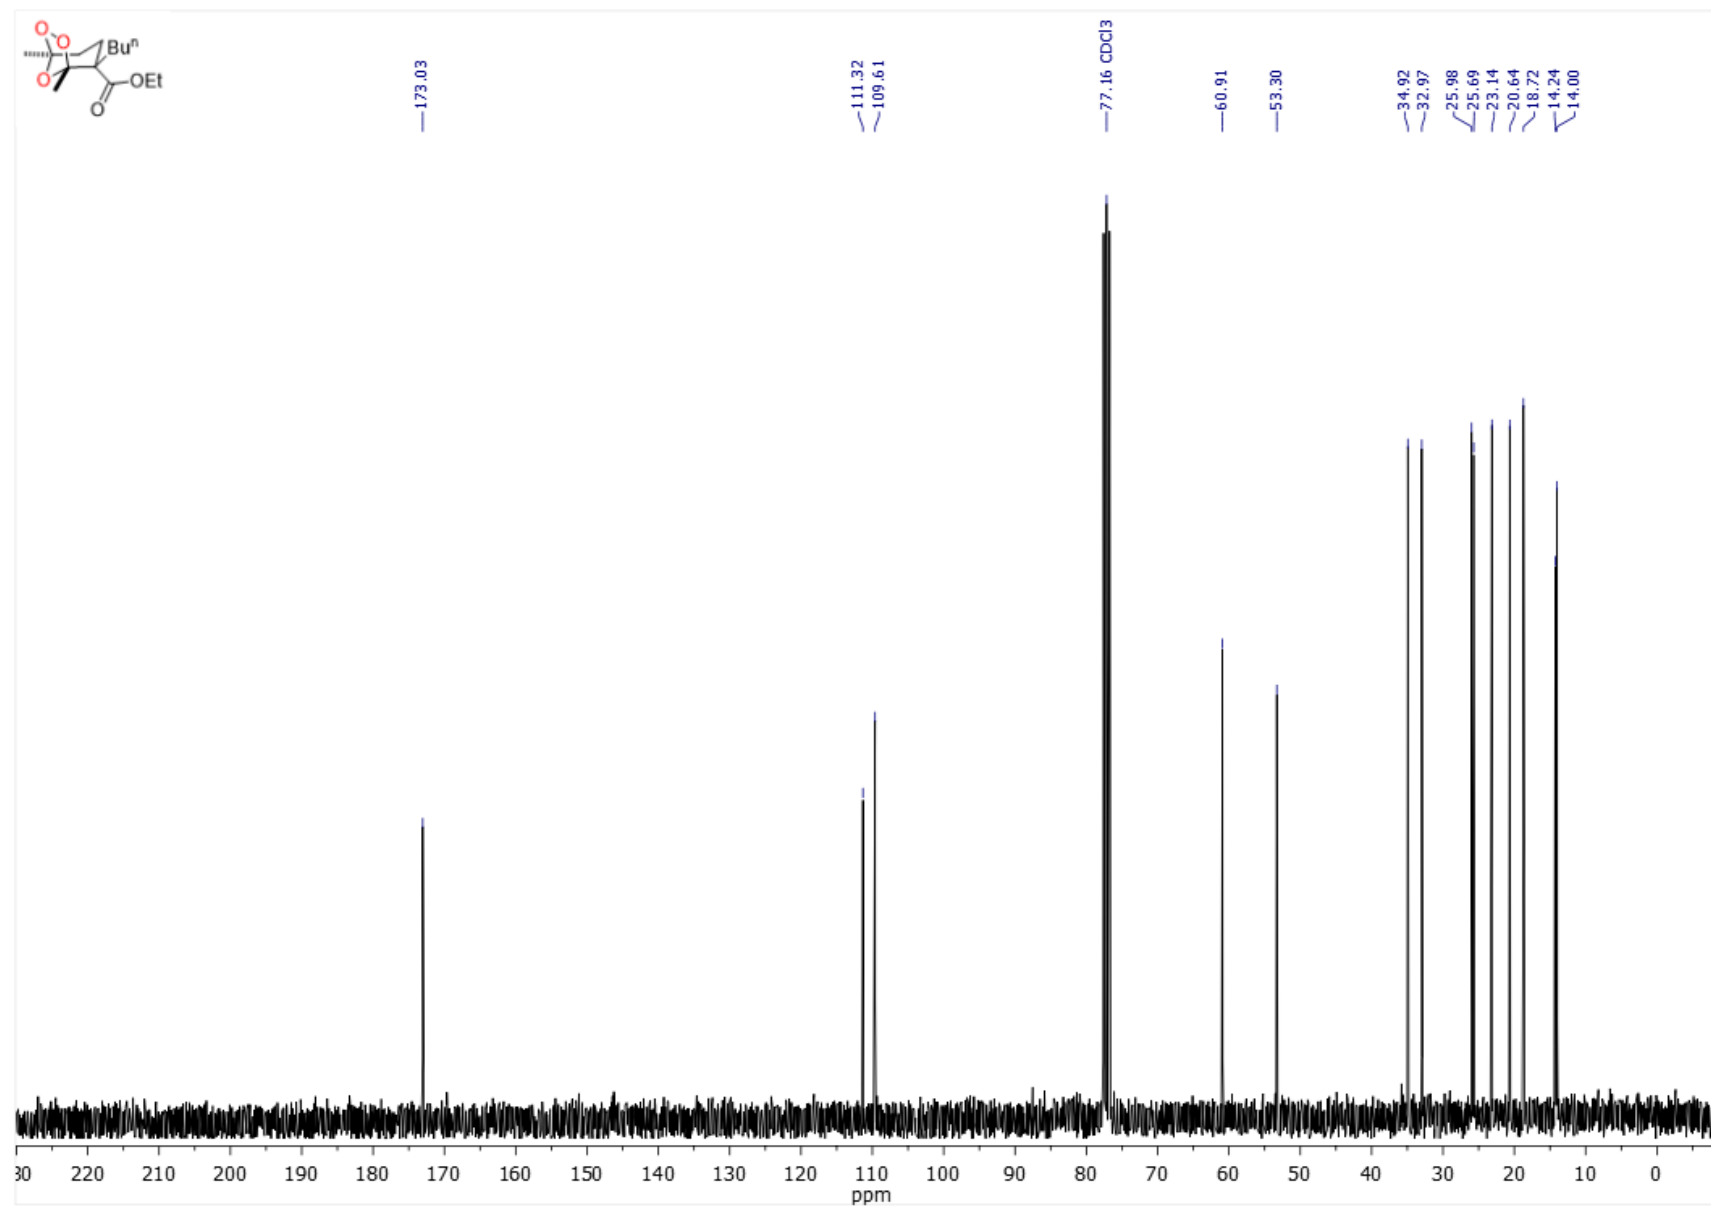

$^1\text{H}$  NMR (300.13 MHz,  $\text{CDCl}_3$ ). Ethyl (1*R*\*,2*R*\*,5*S*\*)-2-butyl-1,5-dimethyl-6,7,8-trioxabicyclo[3.2.1]octane-2-carboxylate, 3h

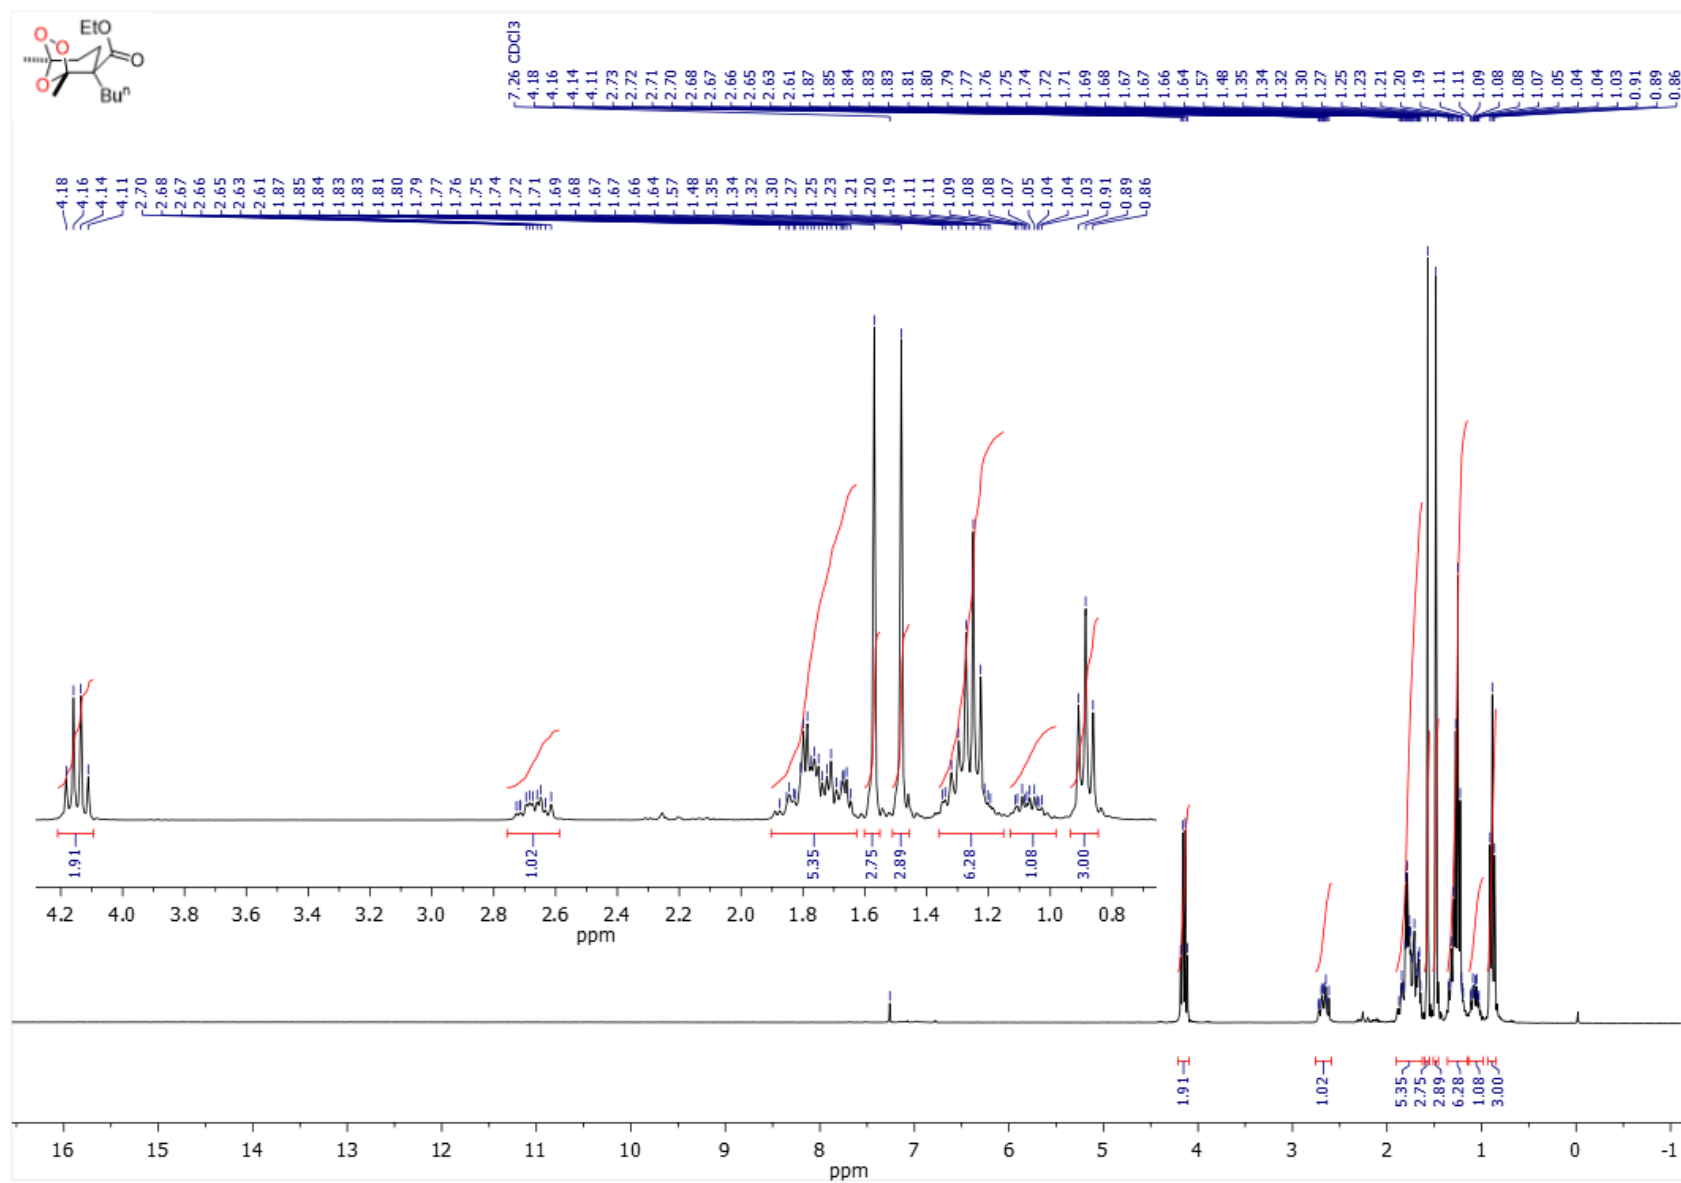



$^{13}\text{C}$  NMR (75.48 MHz,  $\text{CDCl}_3$ ). Ethyl (1*R*\*,2*R*\*,5*S*\*)-2-butyl-1,5-dimethyl-6,7,8-trioxabicyclo[3.2.1]octane-2-carboxylate, 3h

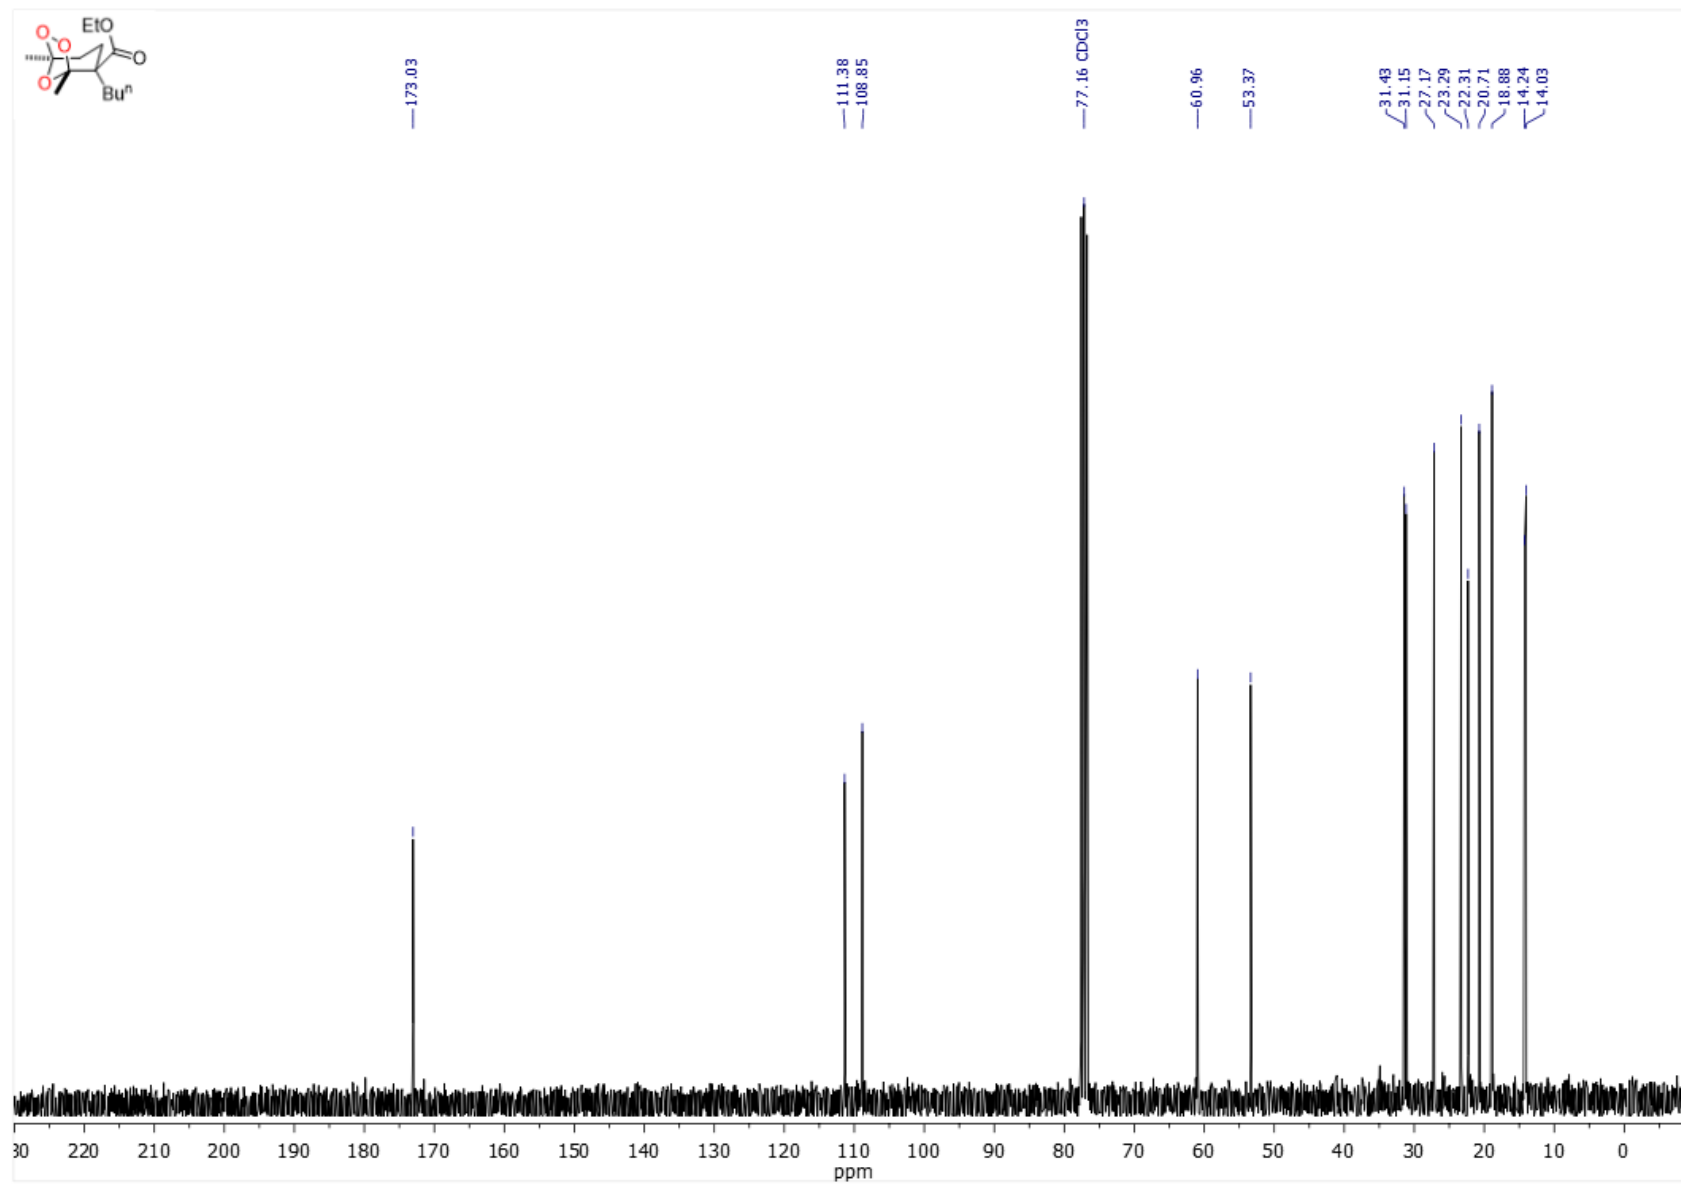

$^1\text{H}$  NMR (300.13 MHz,  $\text{CDCl}_3$ ). Ethyl (1*R*\*,2*S*\*,5*S*\*)-2-hexyl-1,5-dimethyl-6,7,8-trioxabicyclo[3.2.1]octane-2-carboxylate, 2i

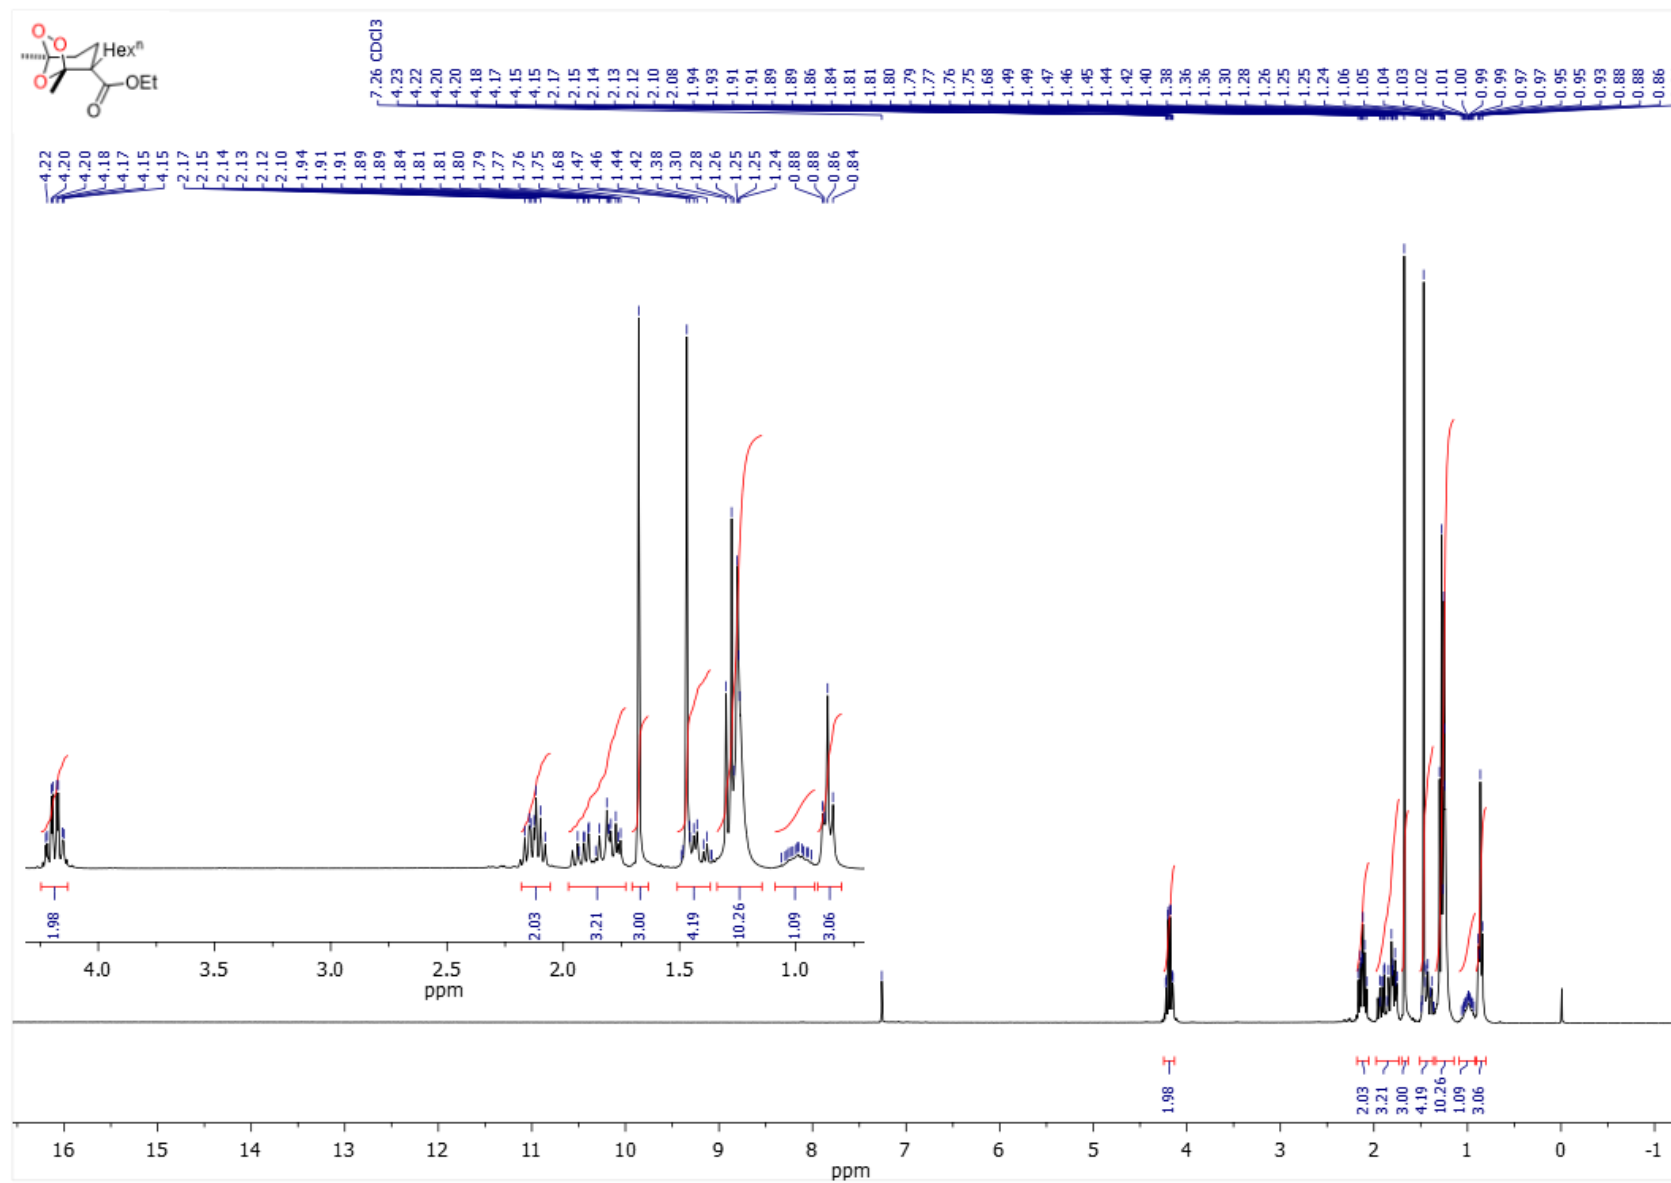

$^{13}\text{C}$  NMR (75.48 MHz,  $\text{CDCl}_3$ ). Ethyl (1*R*\*,2*S*\*,5*S*\*)-2-hexyl-1,5-dimethyl-6,7,8-trioxabicyclo[3.2.1]octane-2-carboxylate, 2i

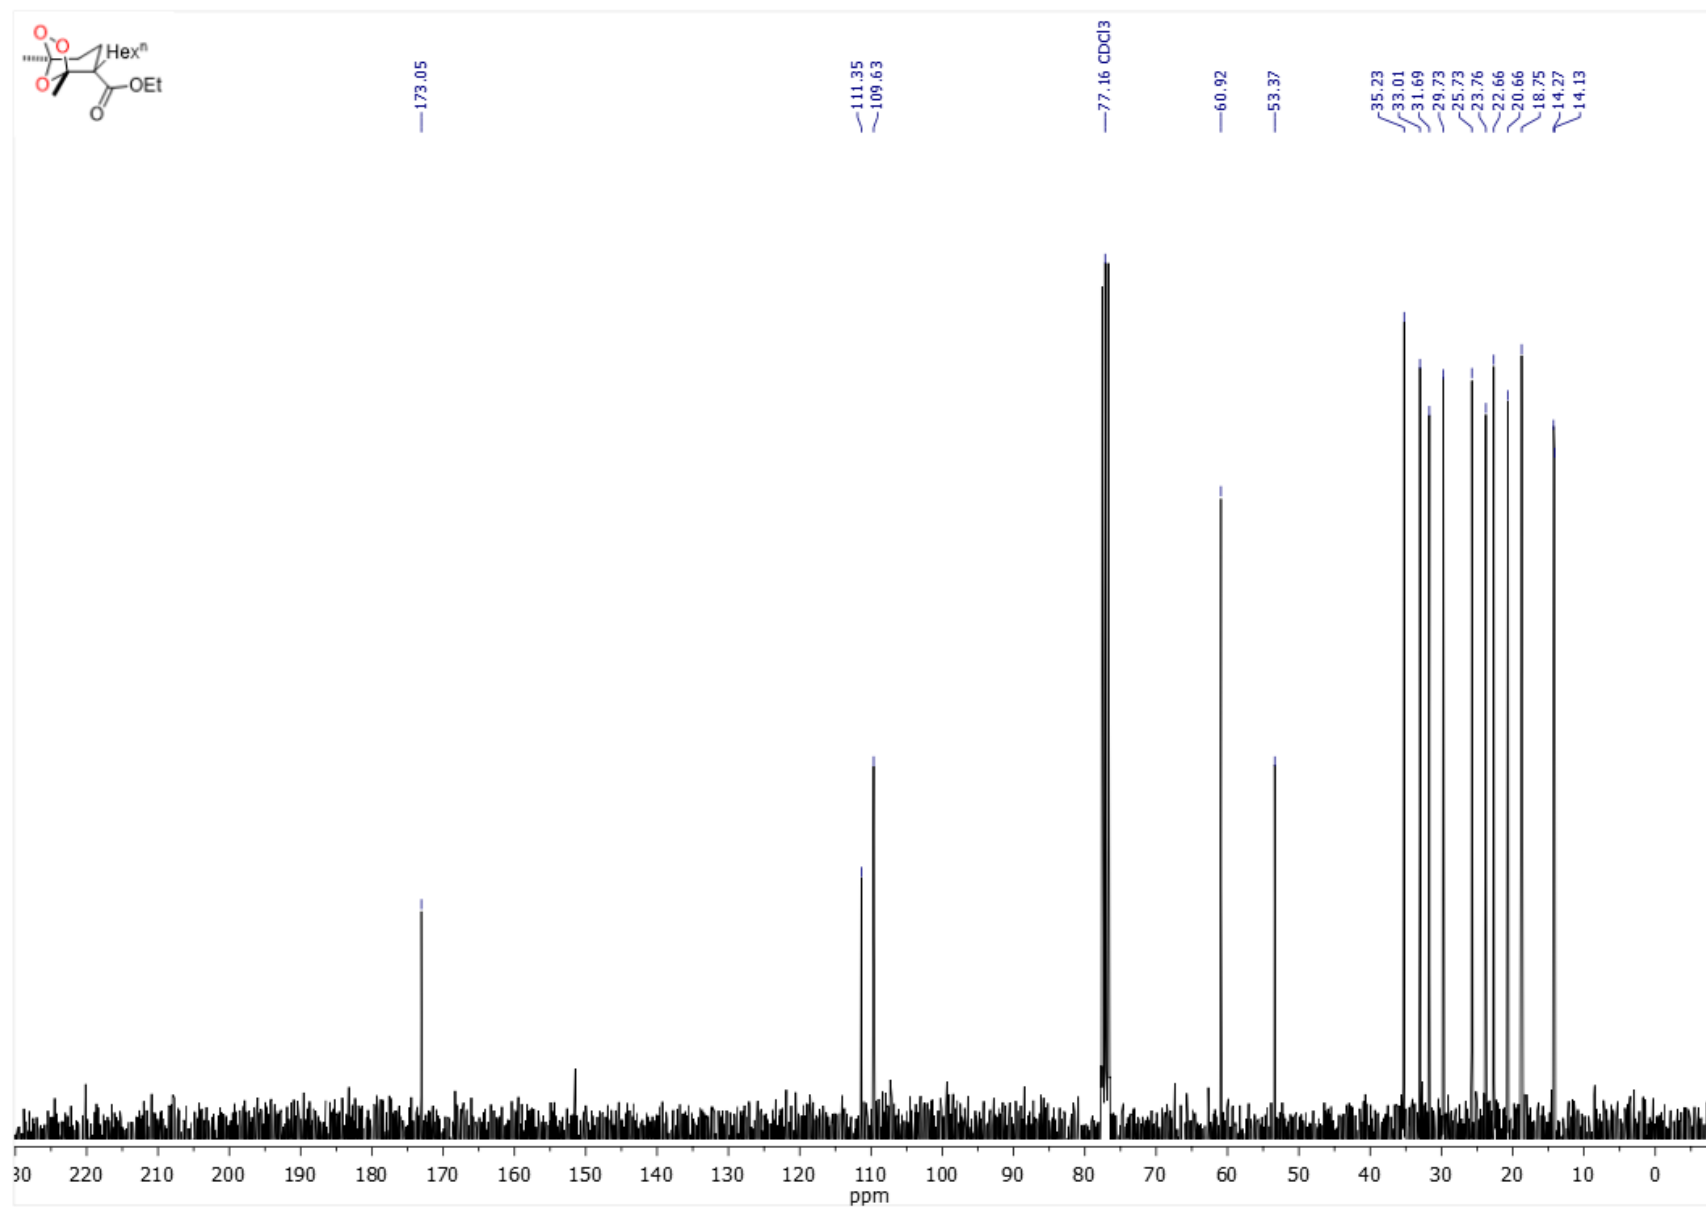

$^1\text{H}$  NMR (300.13 MHz,  $\text{CDCl}_3$ ). Ethyl (1*R*\*,2*R*\*,5*S*\*)-2-hexyl-1,5-dimethyl-6,7,8-trioxabicyclo[3.2.1]octane-2-carboxylate, 3i

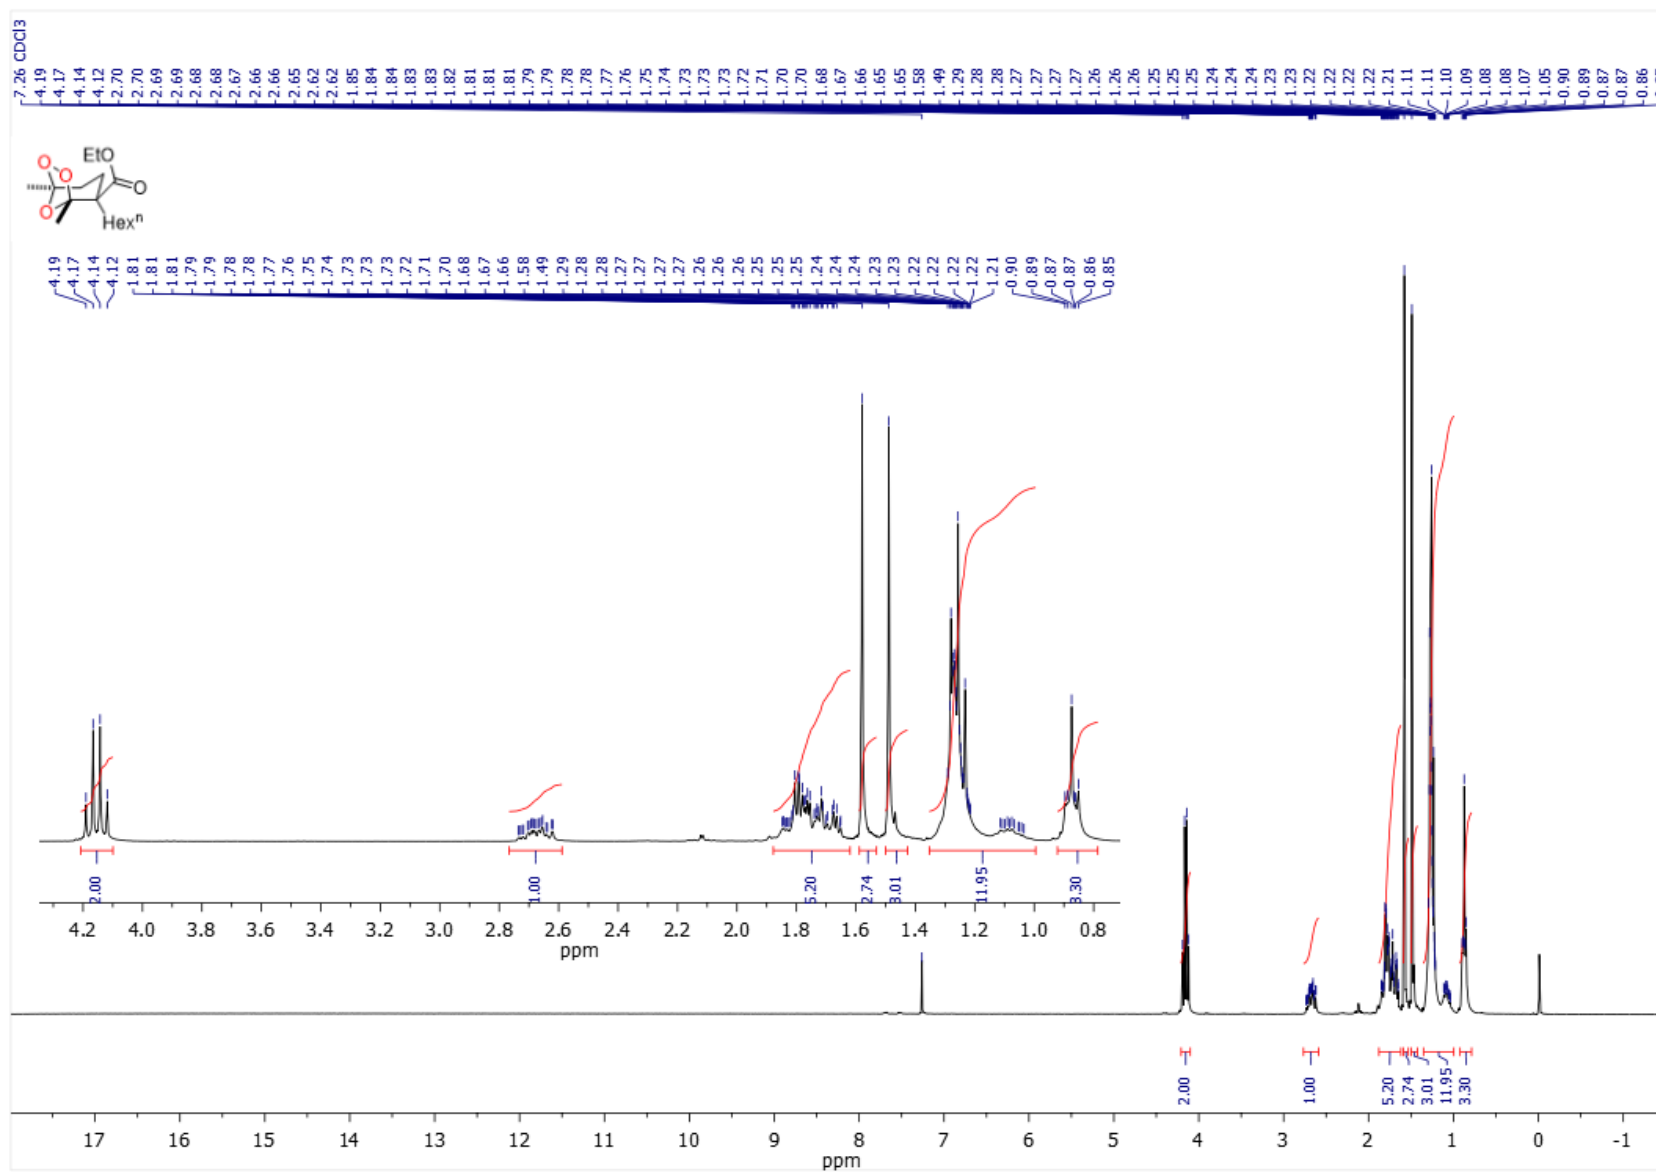

$^{13}\text{C}$  NMR (75.48 MHz,  $\text{CDCl}_3$ ). Ethyl (1*R*\*,2*R*\*,5*S*\*)-2-hexyl-1,5-dimethyl-6,7,8-trioxabicyclo[3.2.1]octane-2-carboxylate, 3i

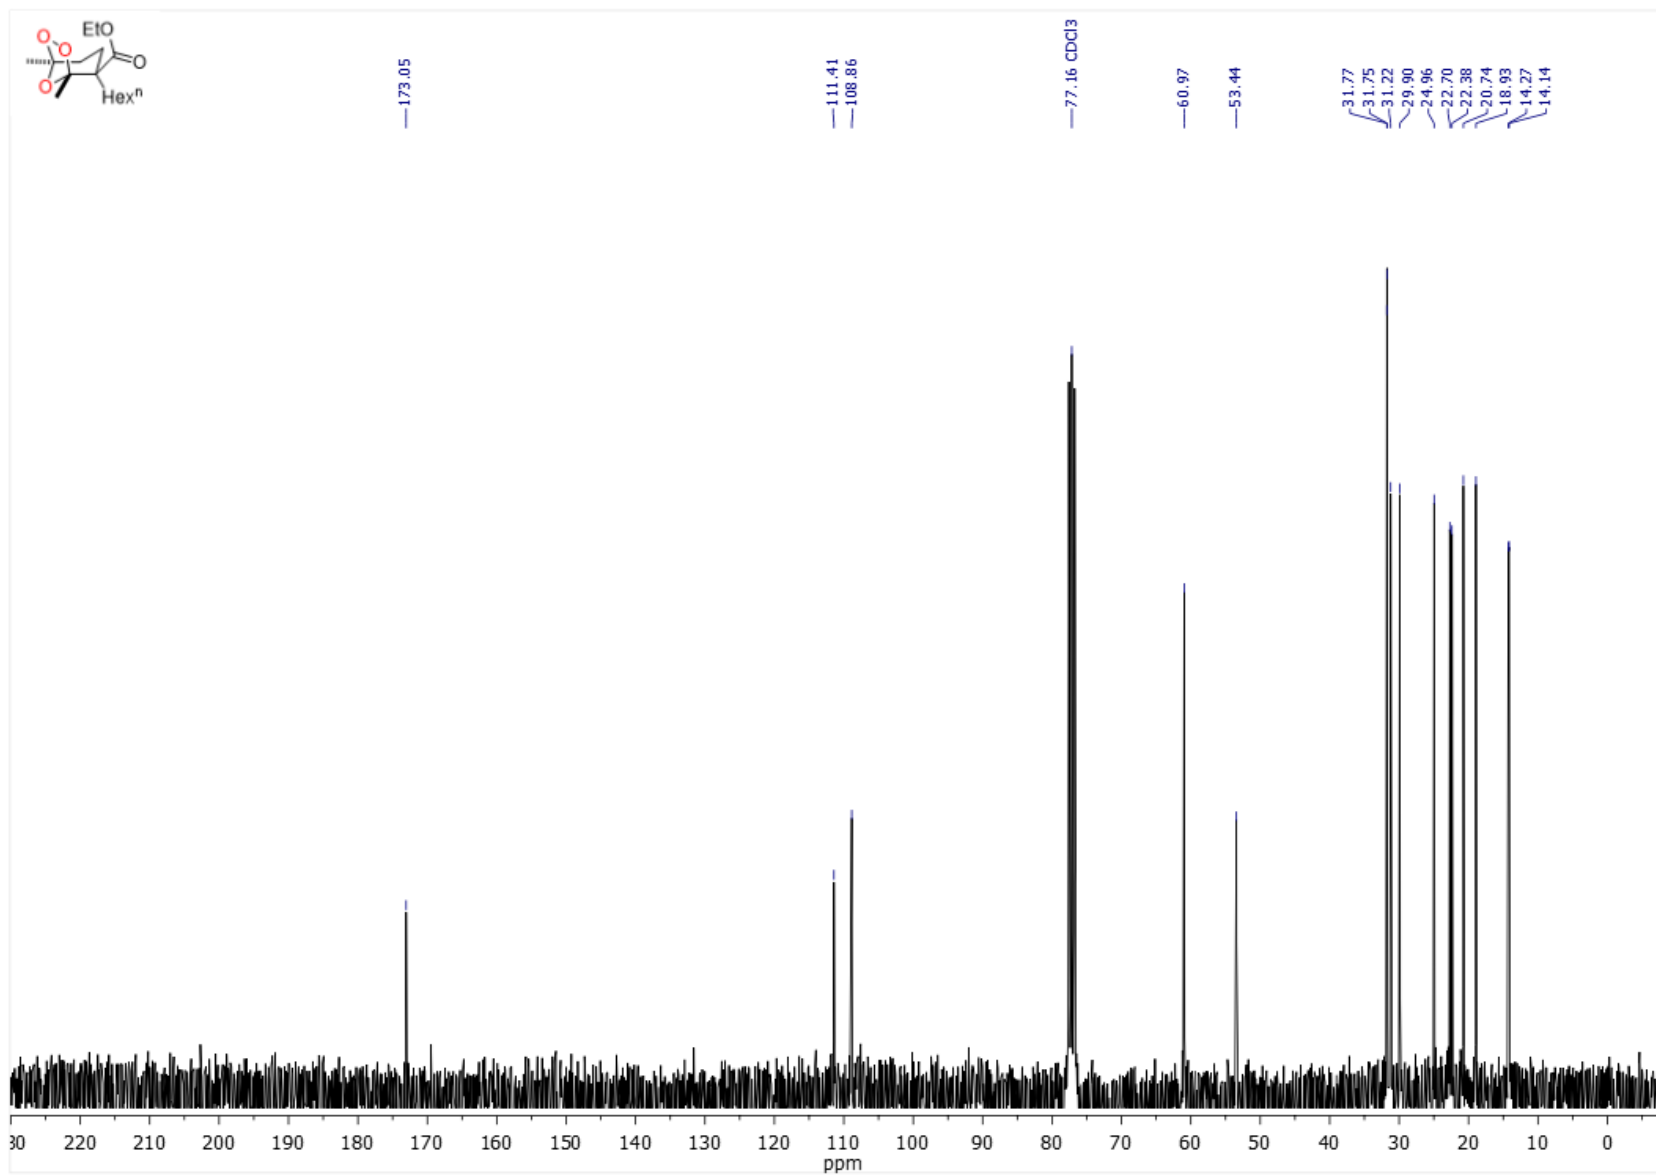

$^1\text{H}$  NMR (300.13 MHz,  $\text{CDCl}_3$ ). Ethyl (1*R*\*,2*R*\*,5*S*\*)-2-allyl-1,5-dimethyl-6,7,8-trioxabicyclo[3.2.1]octane-2-carboxylate, 2j

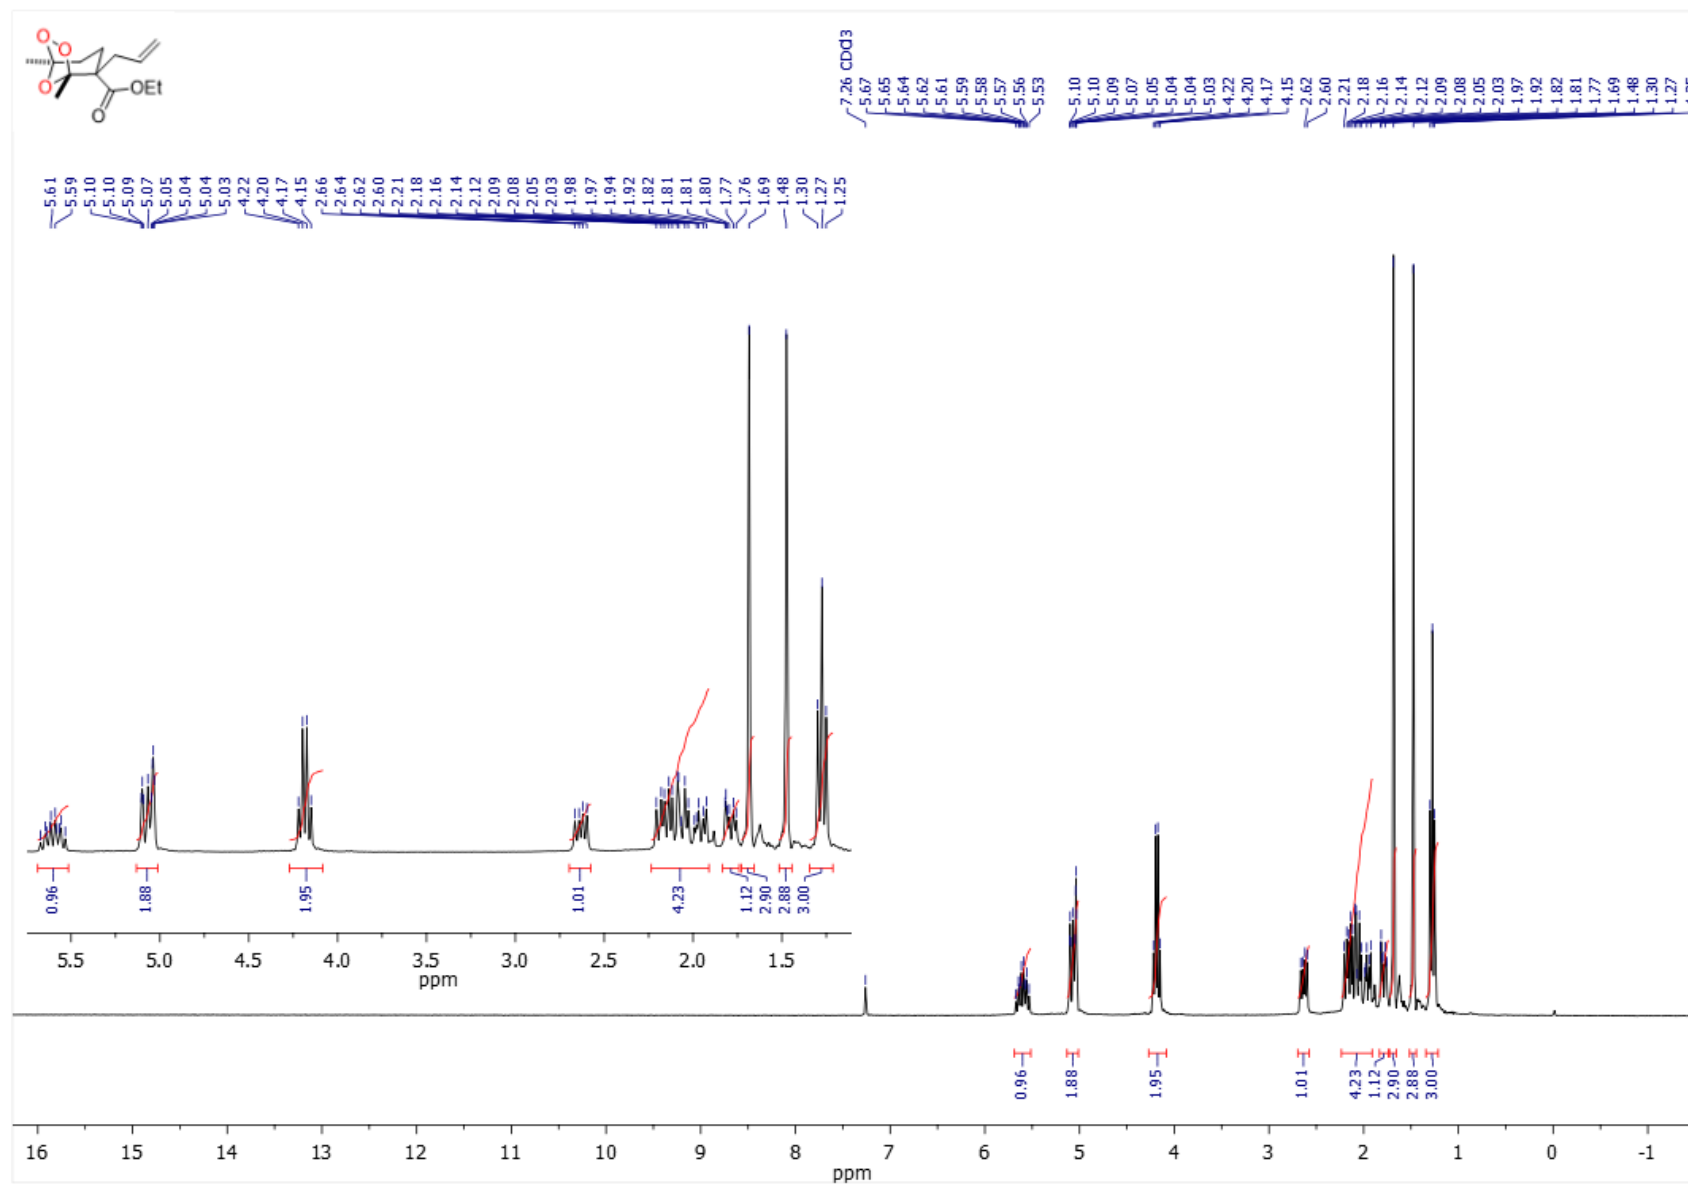

$^{13}\text{C}$  NMR (75.48 MHz,  $\text{CDCl}_3$ ). Ethyl (1*R*\*,2*R*\*,5*S*\*)-2-allyl-1,5-dimethyl-6,7,8-trioxabicyclo[3.2.1]octane-2-carboxylate, 2j

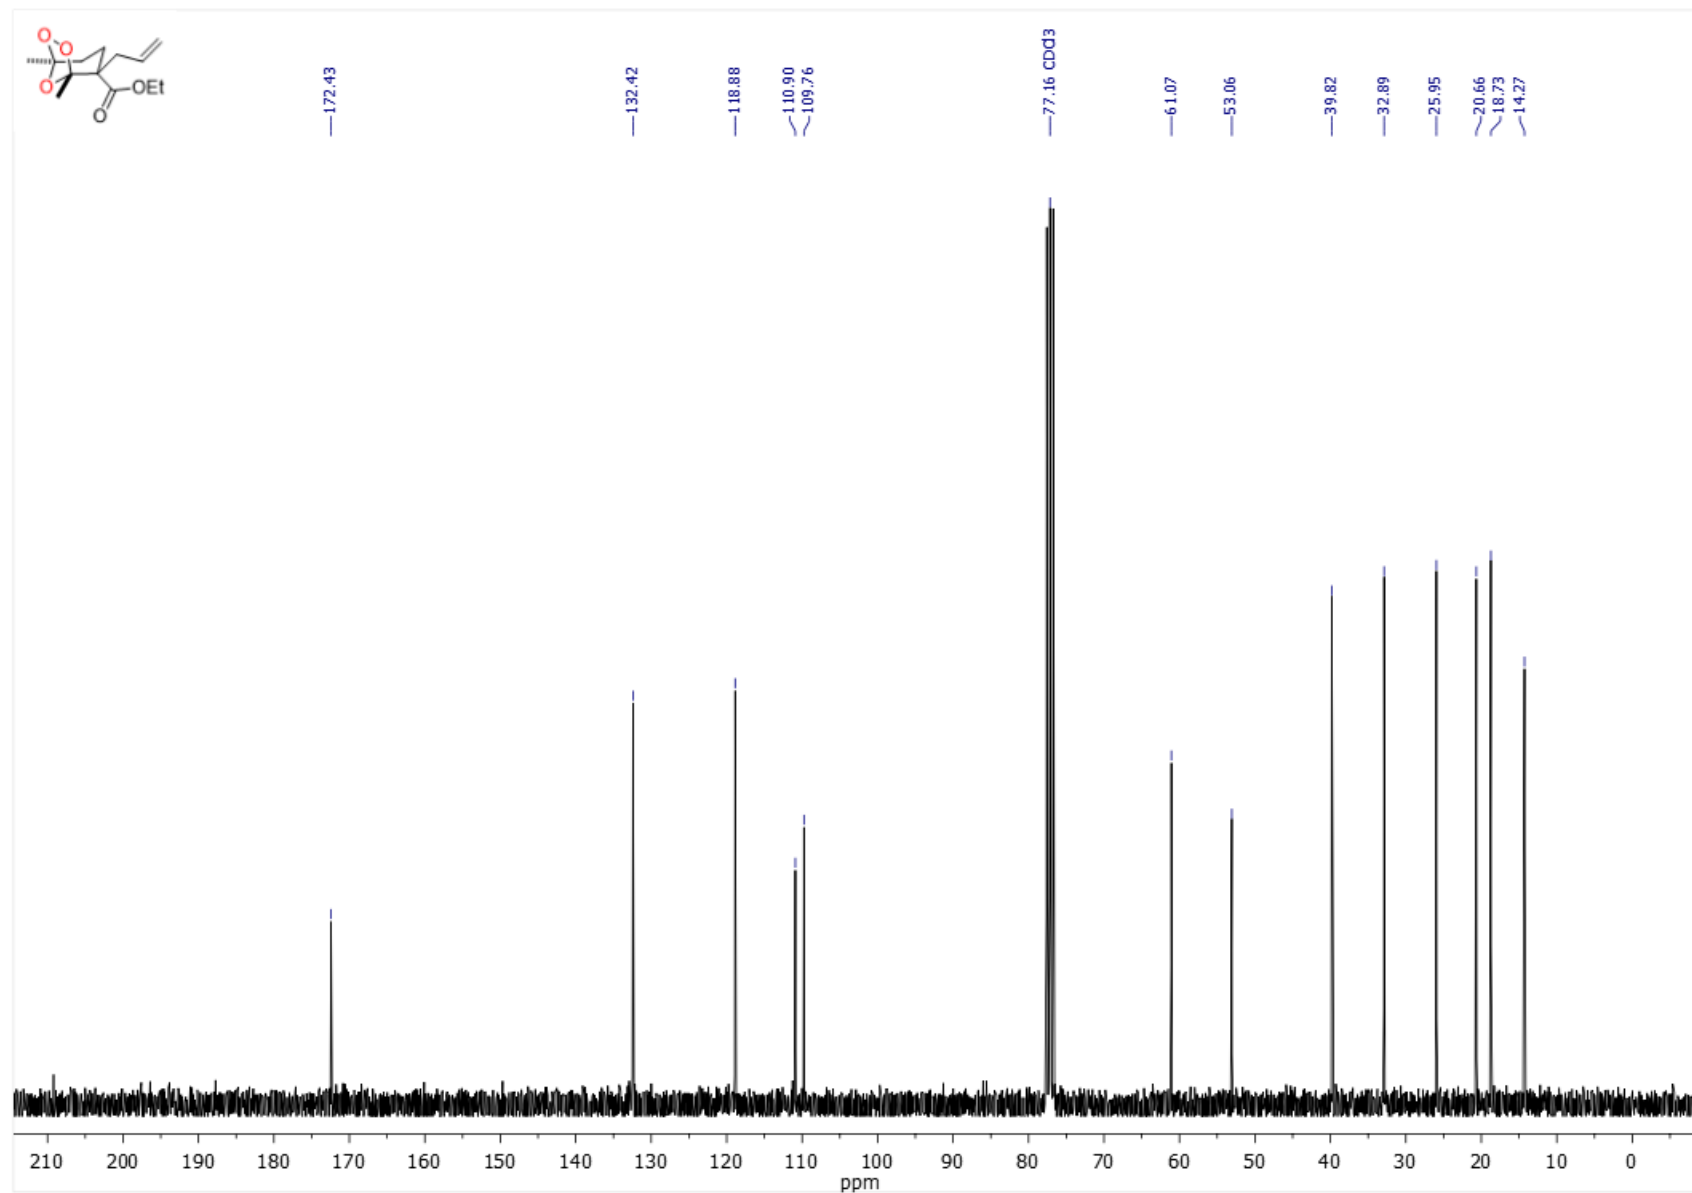

$^1\text{H}$  NMR (300.13 MHz,  $\text{CDCl}_3$ ). Ethyl (1*R*\*,2*S*\*,5*S*\*)-2-allyl-1,5-dimethyl-6,7,8-trioxabicyclo[3.2.1]octane-2-carboxylate, 3j

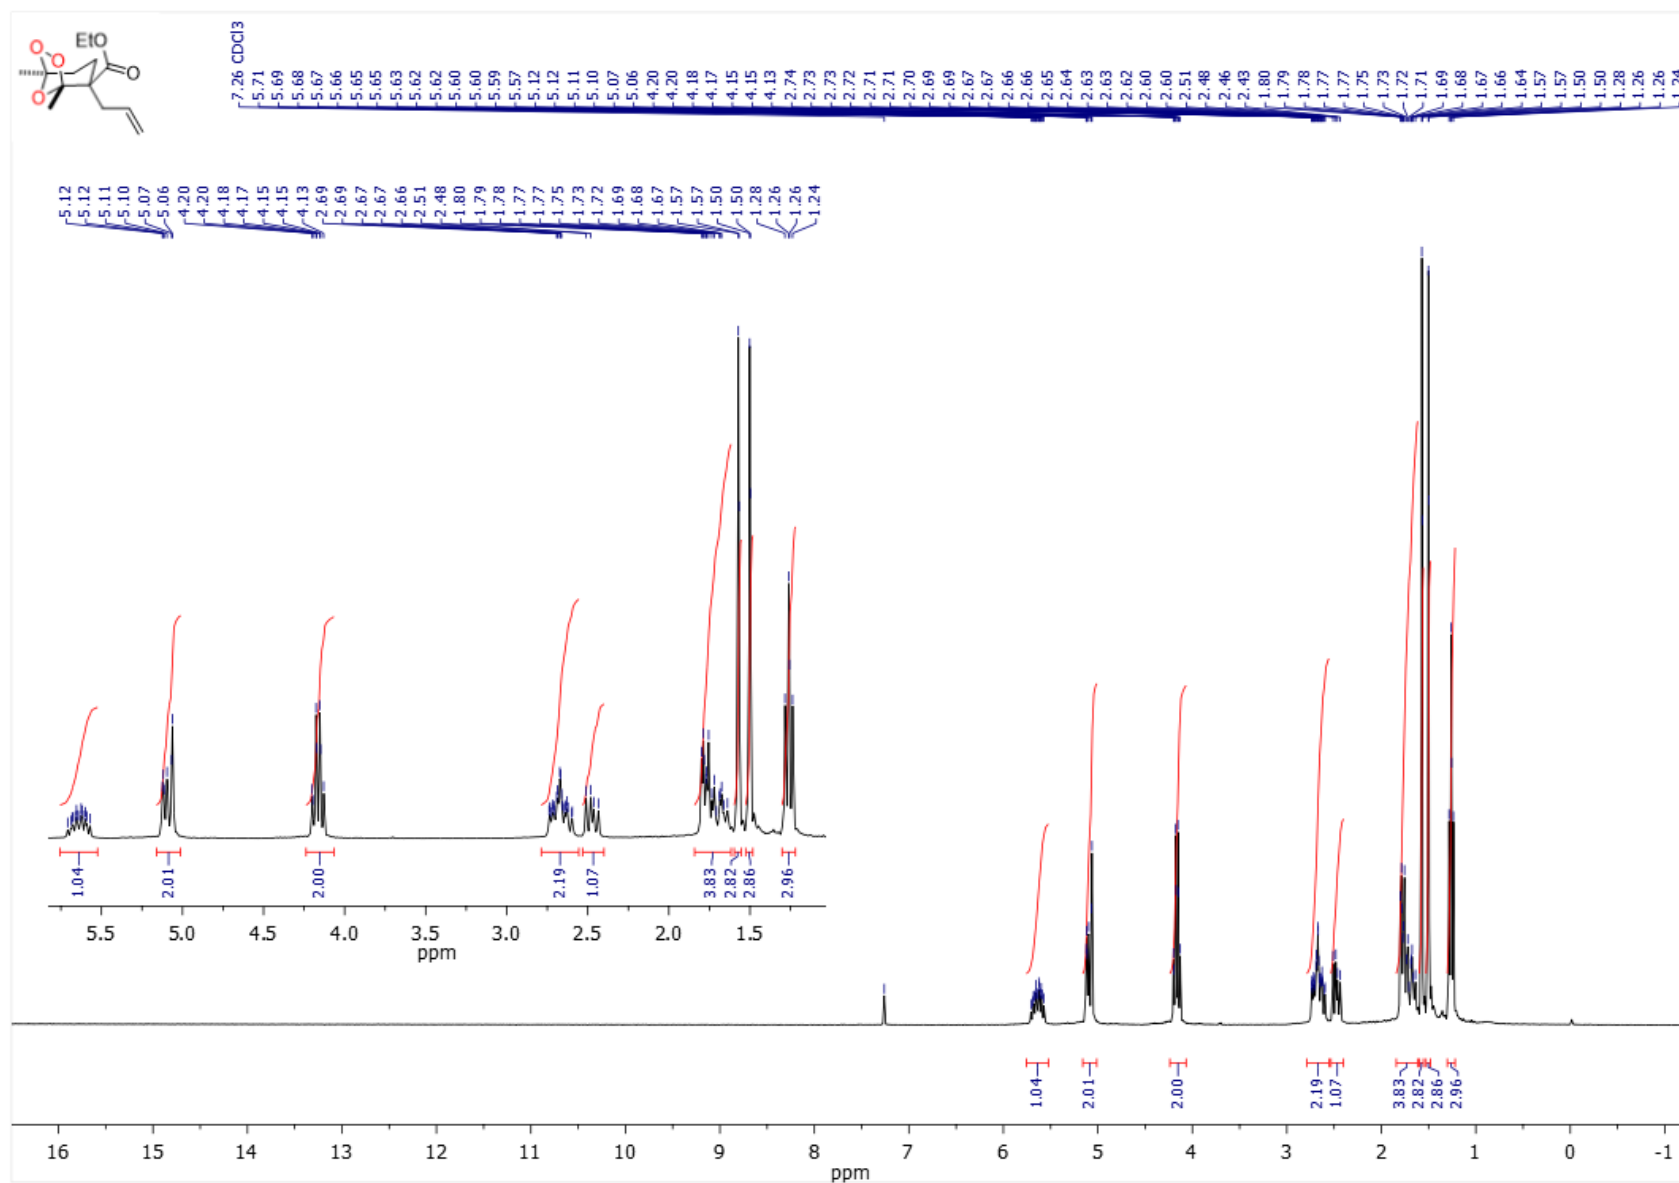



$^{13}\text{C}$  NMR (75.48 MHz,  $\text{CDCl}_3$ ). Ethyl (1*R*\*,2*S*\*,5*S*\*)-2-allyl-1,5-dimethyl-6,7,8-trioxabicyclo[3.2.1]octane-2-carboxylate, 3j

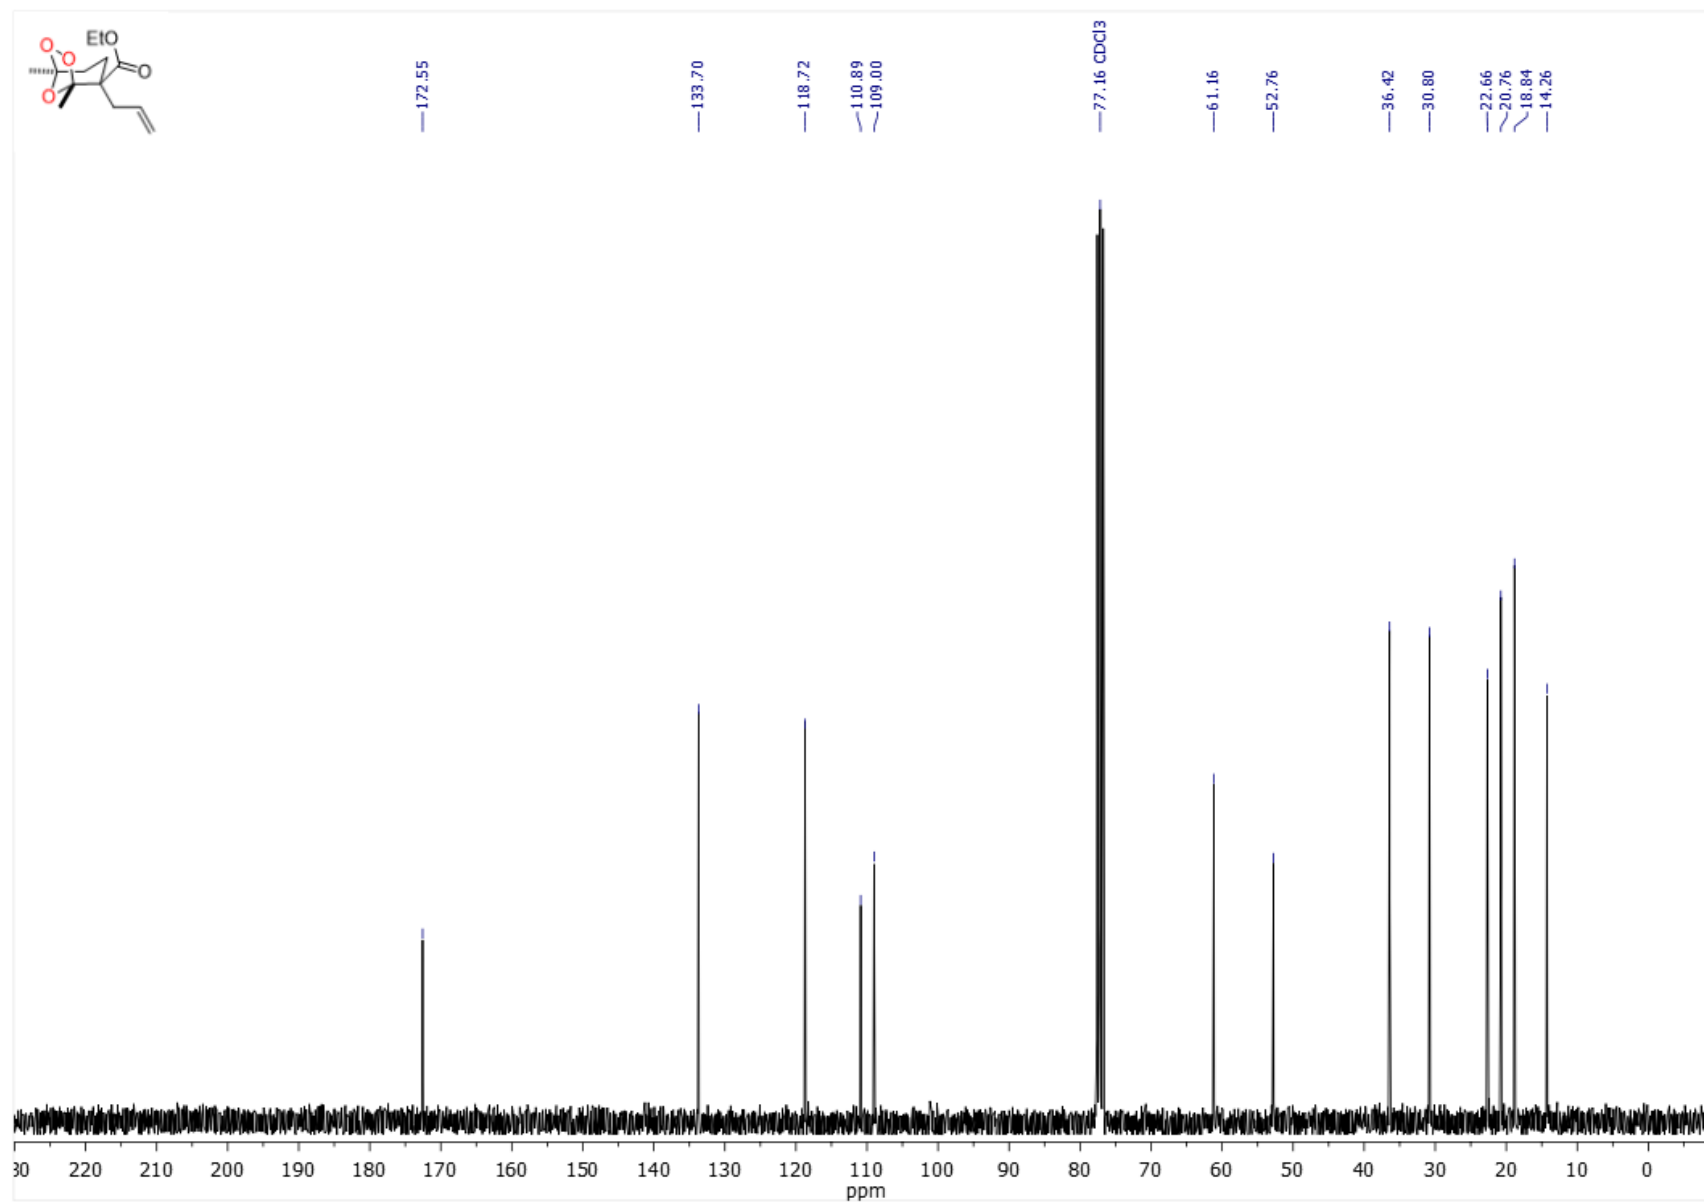

$^1\text{H}$  NMR (300.13 MHz,  $\text{CDCl}_3$ ). Ethyl(1*R*\*,2*S*\*,5*S*\*)-2-(2-cyanoethyl)-1,5-dimethyl-6,7,8-trioxabicyclo[3.2.1]octane-2-carboxylate, 2k

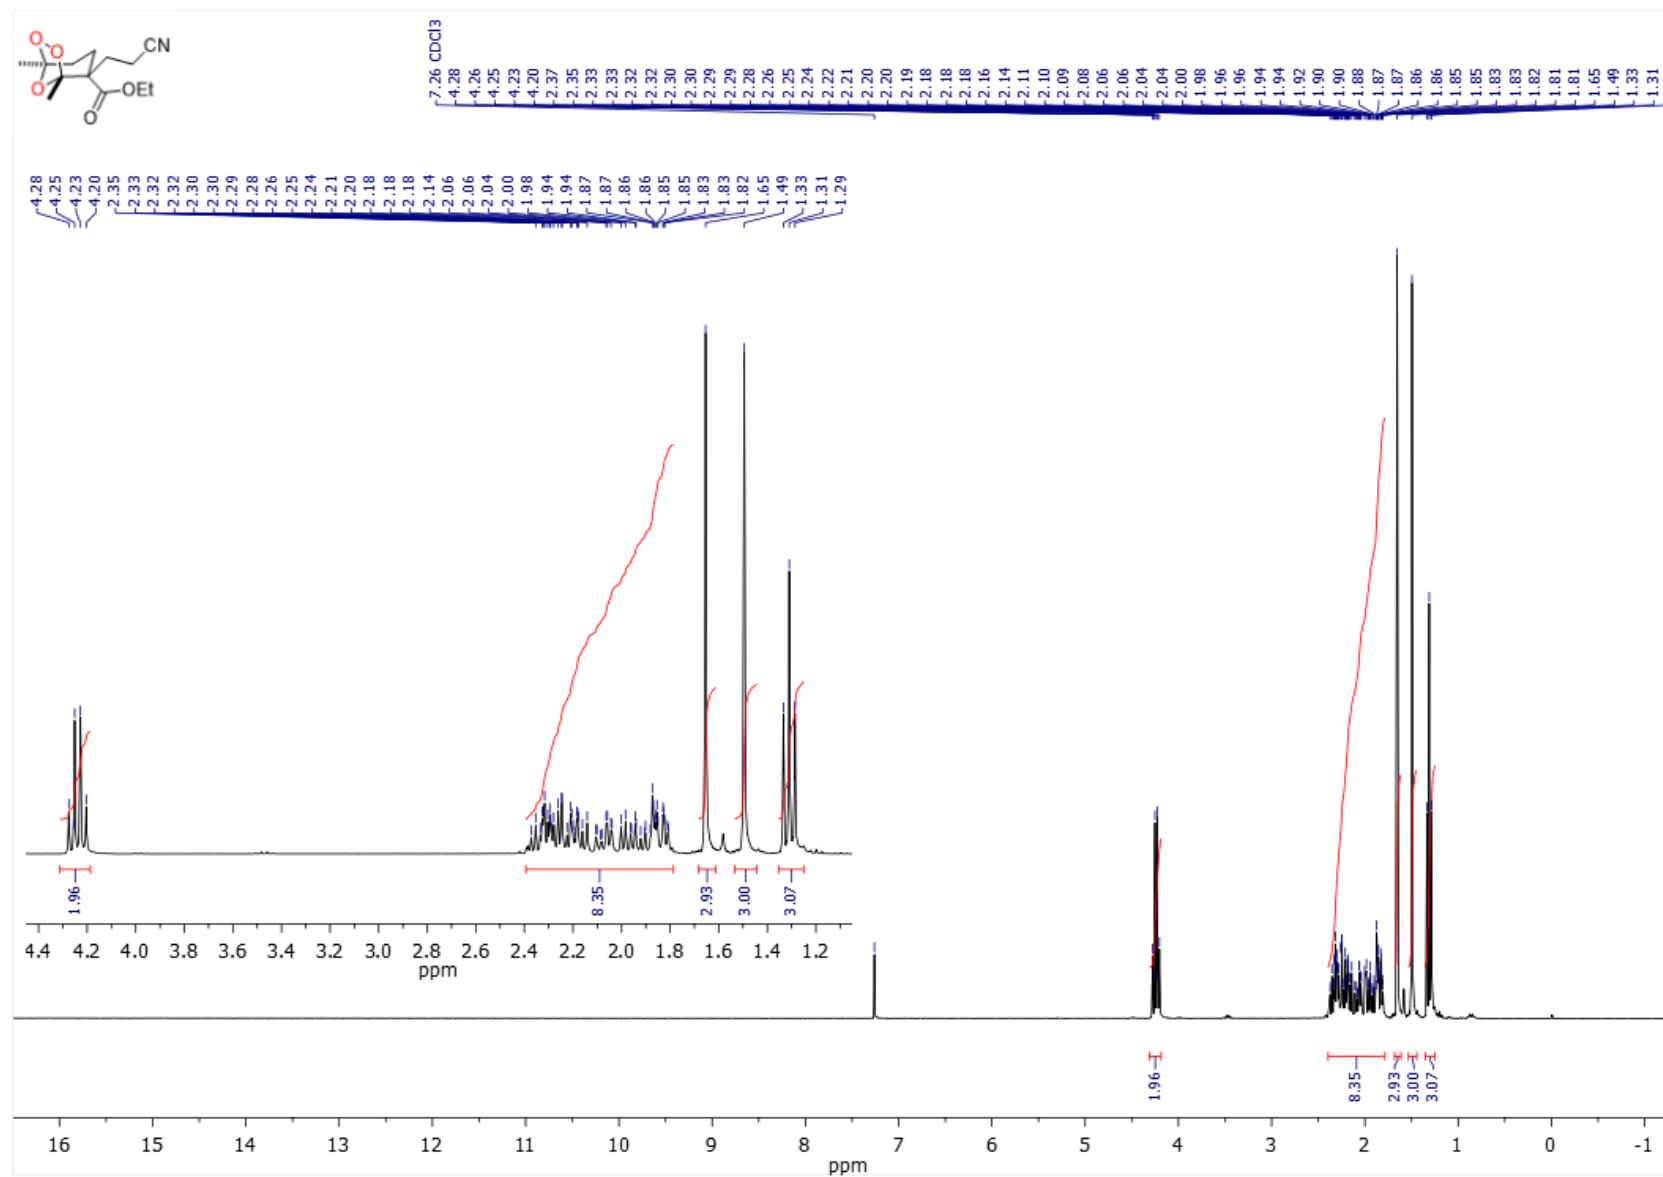

$^{13}\text{C}$  NMR (75.48 MHz,  $\text{CDCl}_3$ ). Ethyl(1*R*\*,2*S*\*,5*S*\*)-2-(2-cyanoethyl)-1,5-dimethyl-6,7,8-trioxabicyclo[3.2.1]octane-2-carboxylate, 2k

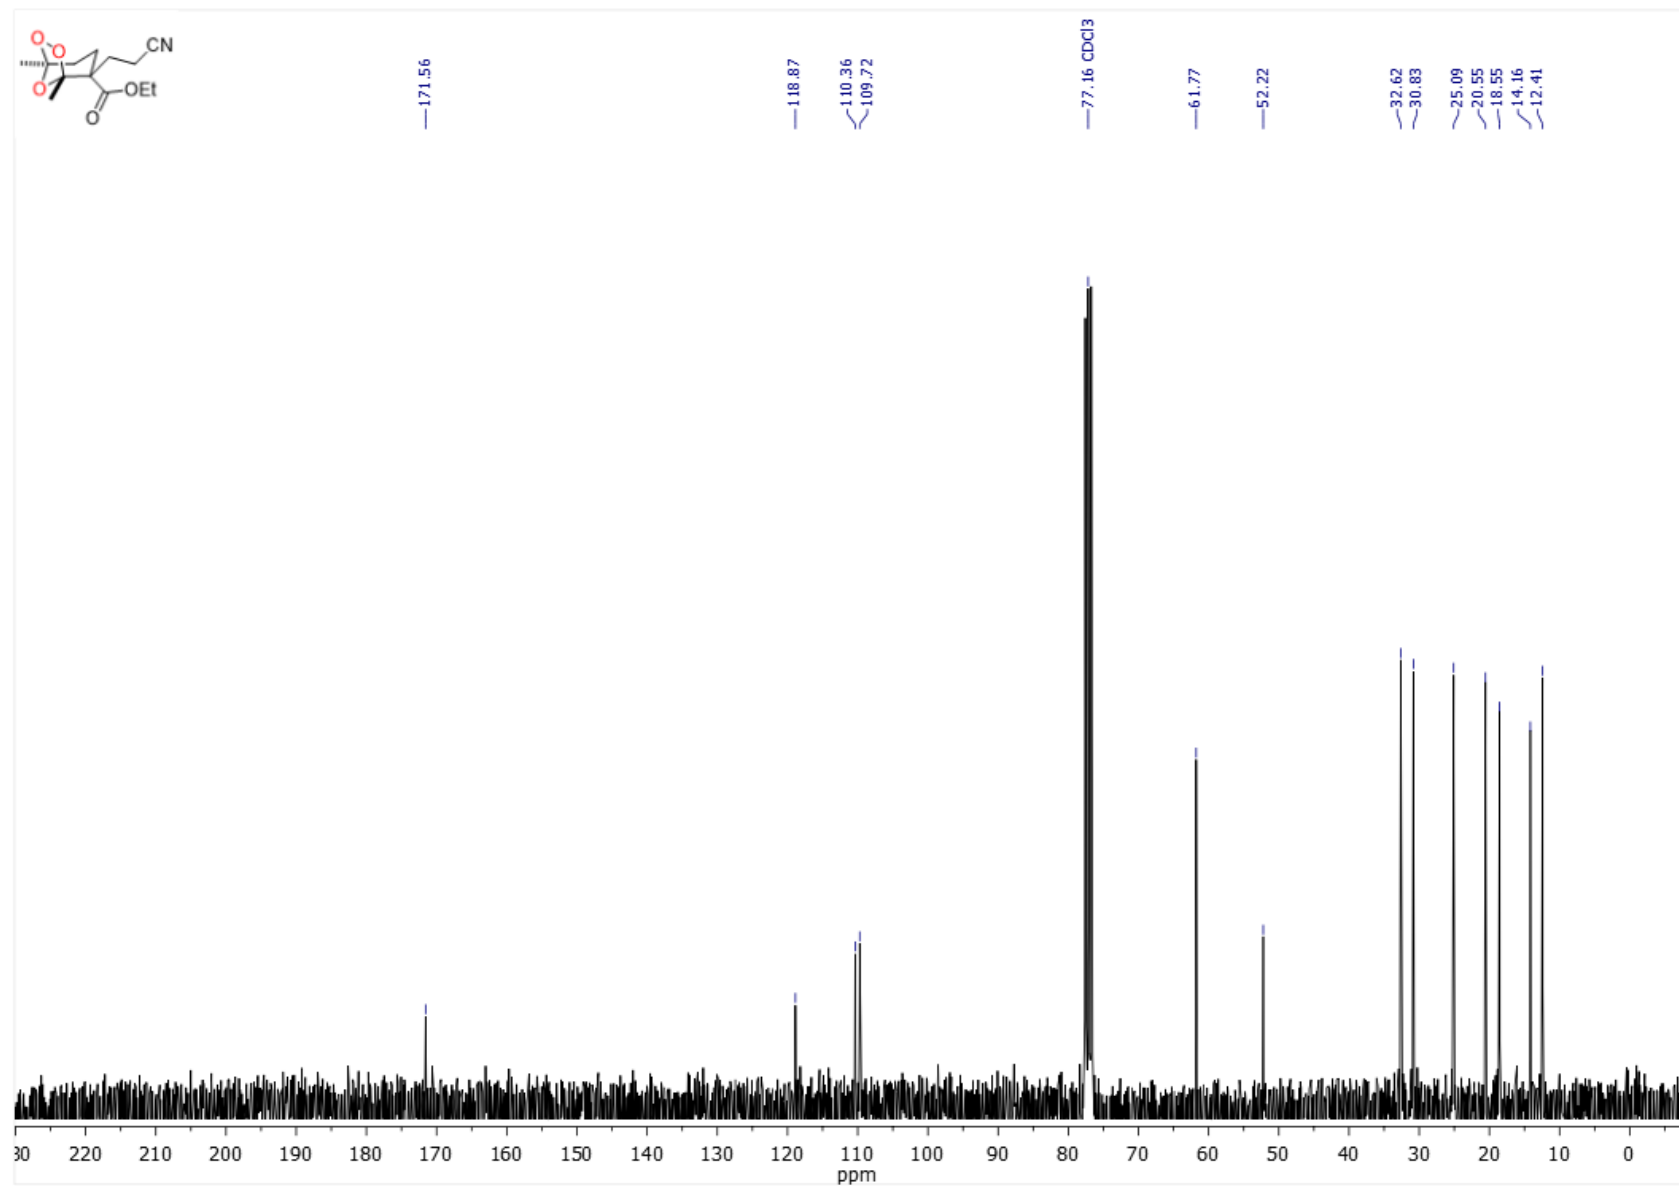

$^1\text{H}$  NMR (300.13 MHz,  $\text{CDCl}_3$ ). Ethyl (1*R*\*,2*R*\*,5*S*\*)-2-(2-cyanoethyl)-1,5-dimethyl-6,7,8-trioxabicyclo[3.2.1]octane-2-carboxylate, 3k

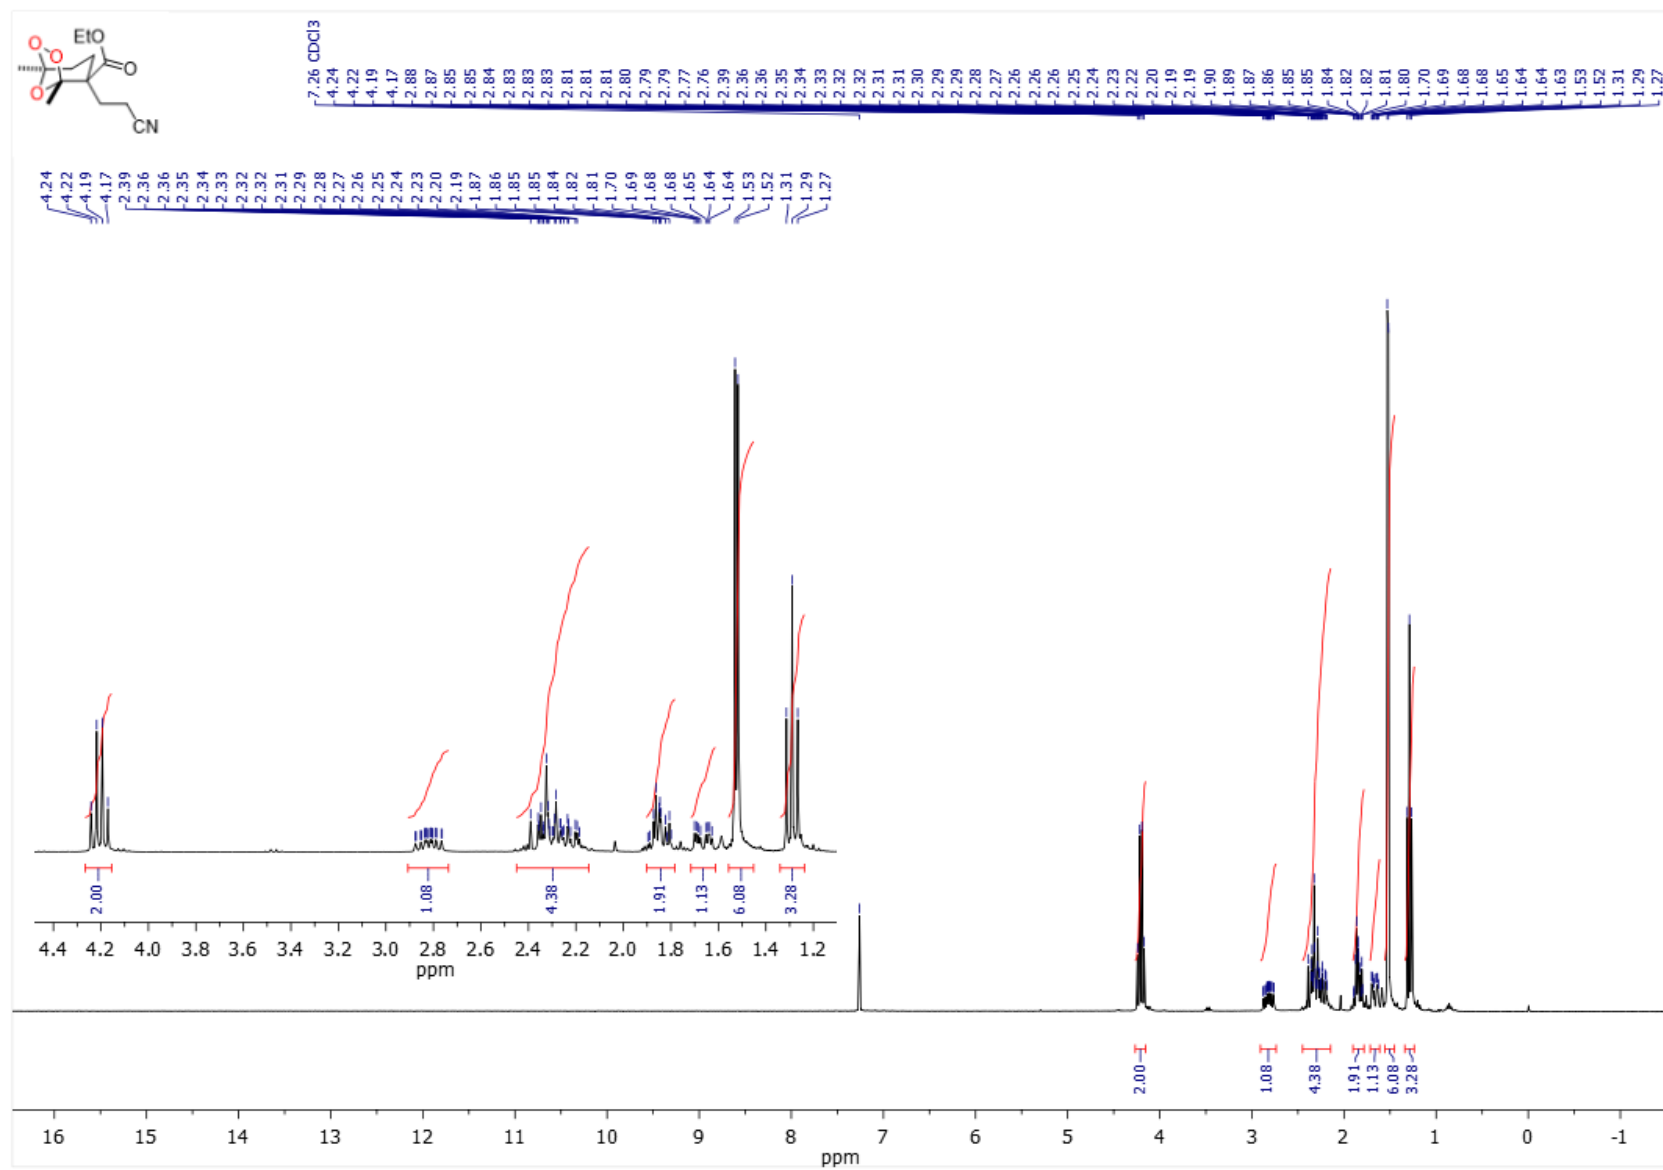

$^{13}\text{C}$  NMR (75.48 MHz,  $\text{CDCl}_3$ ). Ethyl (1*R*\*,2*R*\*,5*S*\*)-2-(2-cyanoethyl)-1,5-dimethyl-6,7,8-trioxabicyclo[3.2.1]octane-2-carboxylate, 3k

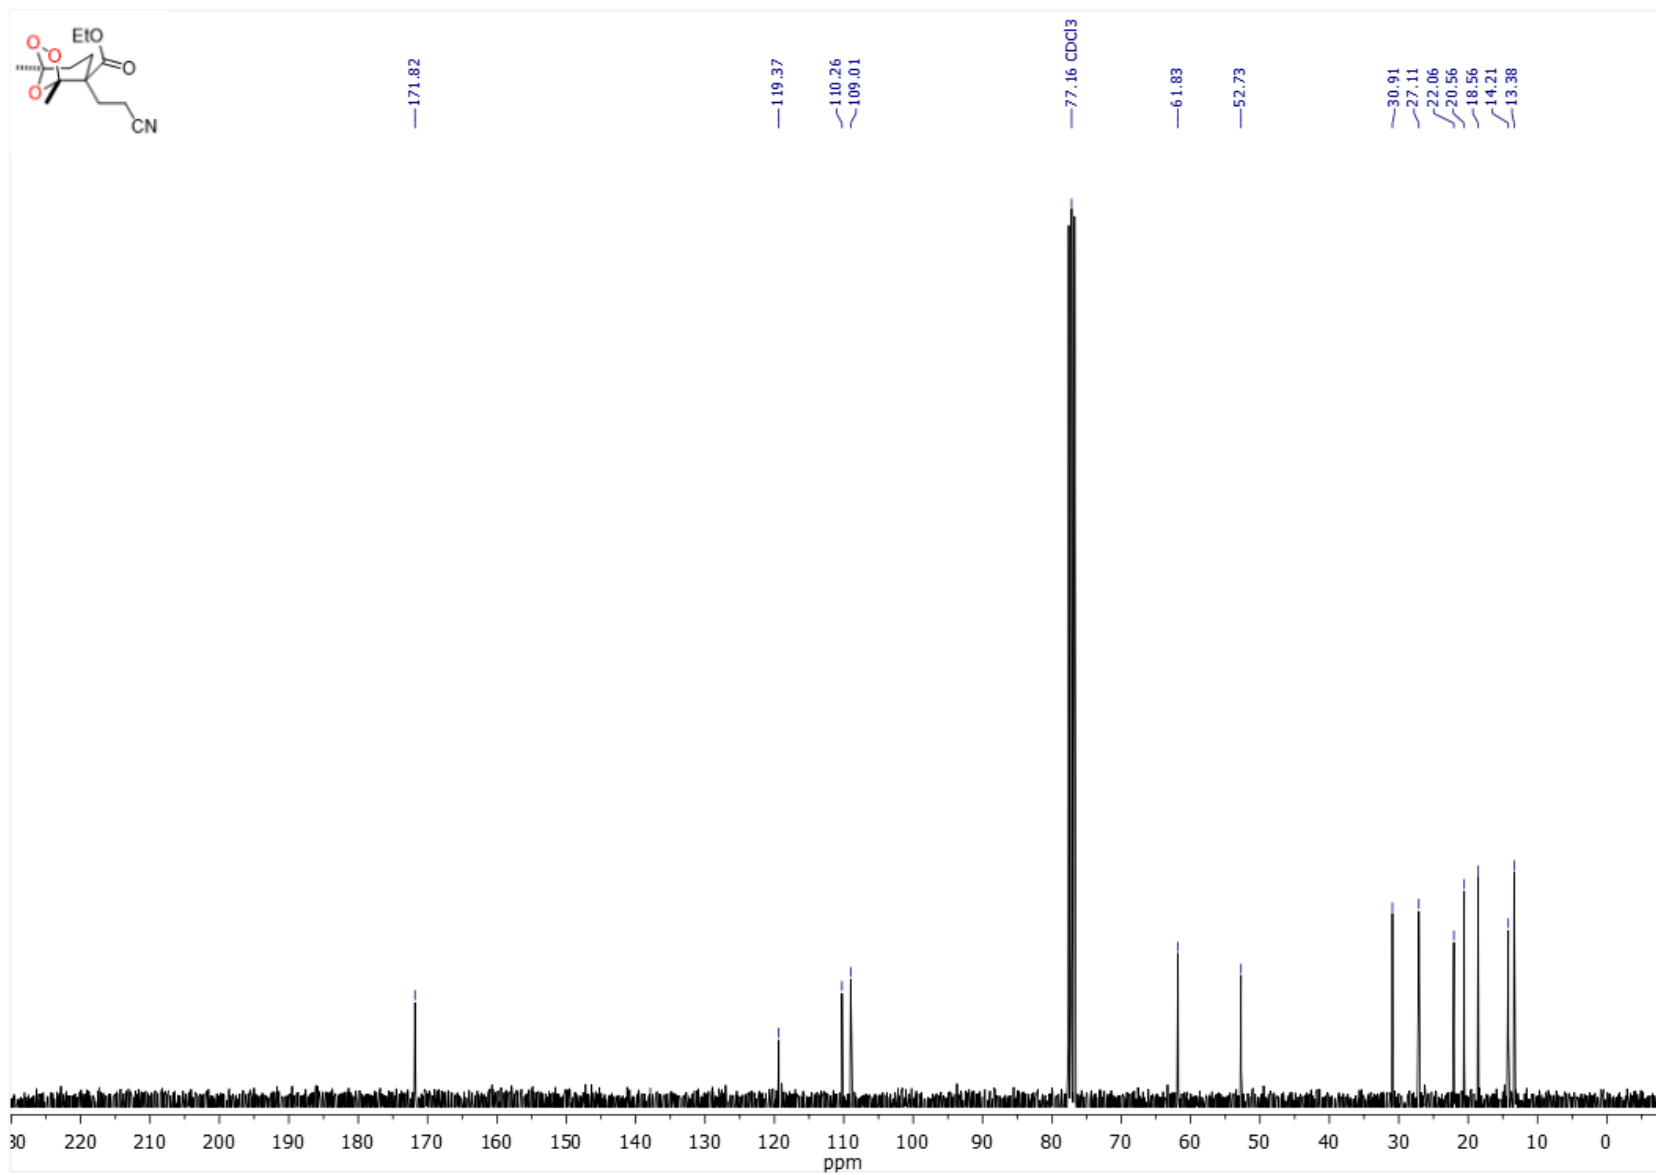

$^1\text{H}$  NMR (300.13 MHz,  $\text{CDCl}_3$ ). (1*R*\*,2*S*\*,5*S*\*)-2-(4-chlorobenzyl)-1,5-dimethyl-6,7,8-trioxabicyclo[3.2.1]octan-2-yl)methanol, 4

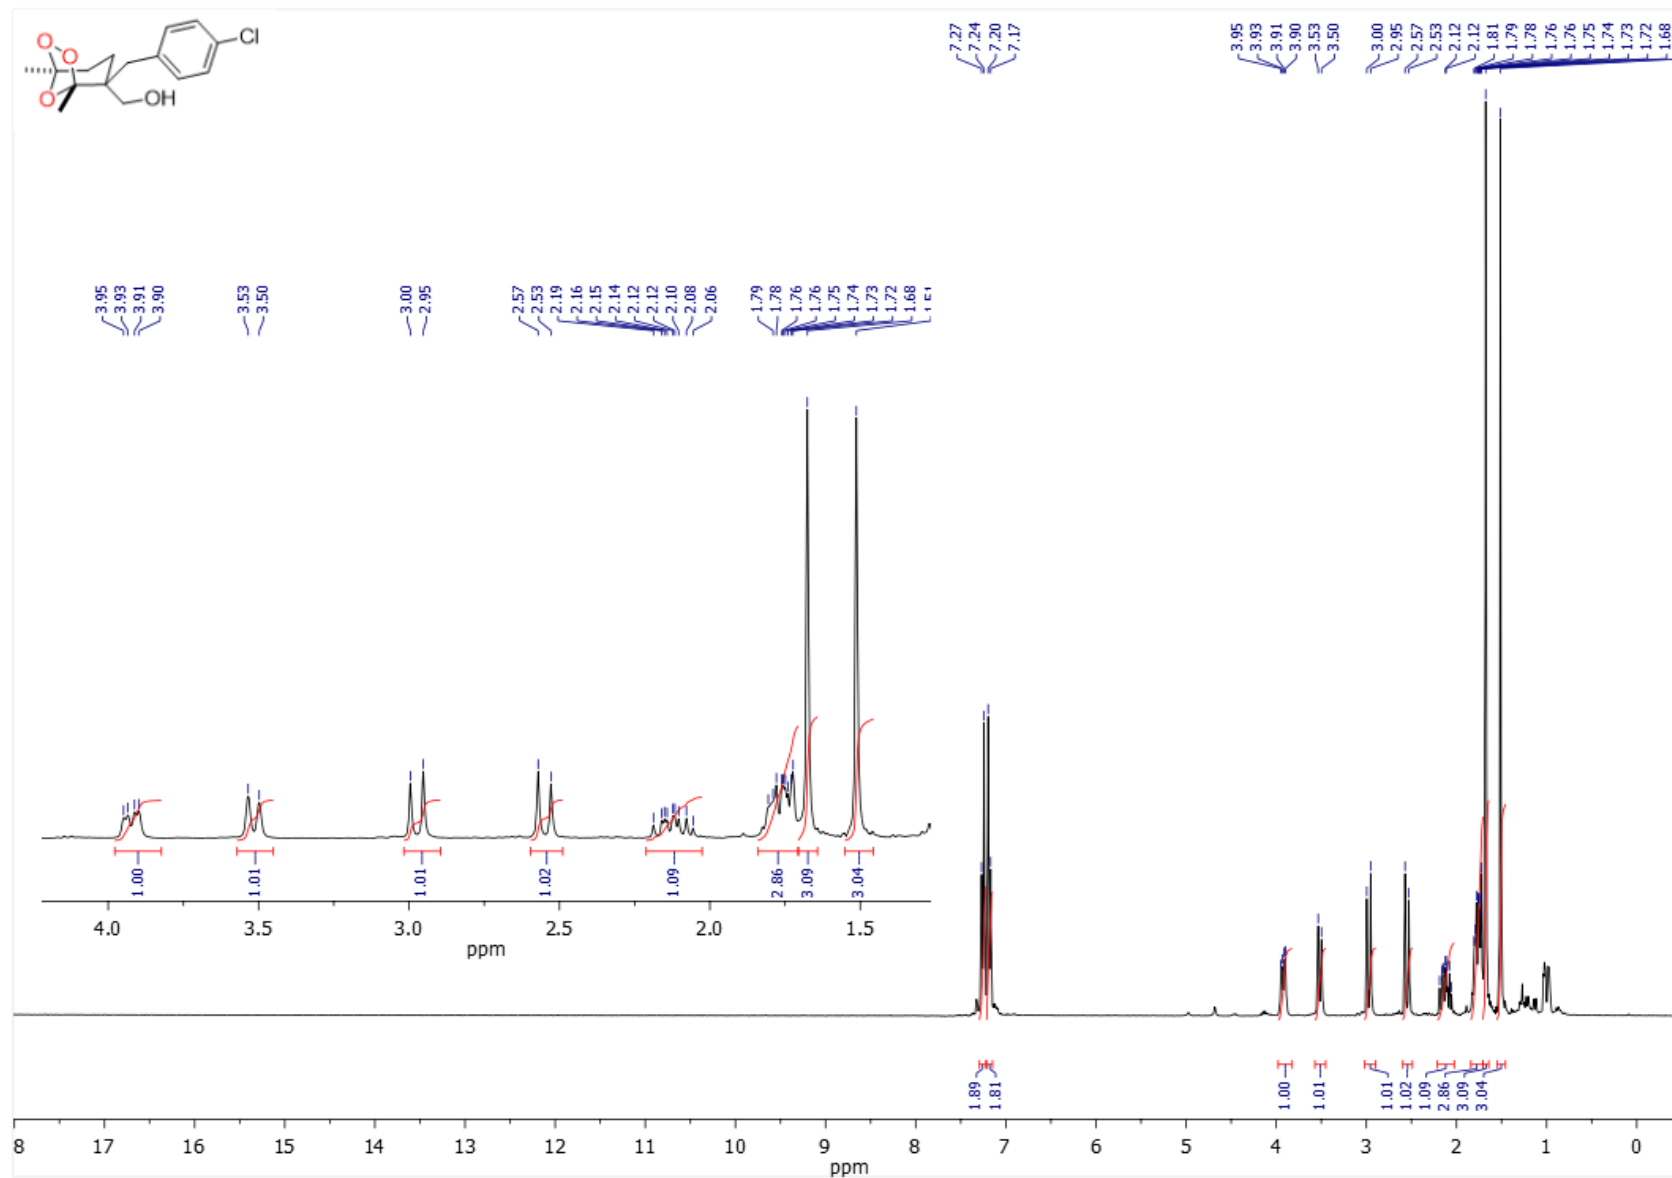

$^{13}\text{C}$  NMR (75.48 MHz,  $\text{CDCl}_3$ ). (1*R*\*,2*S*\*,5*S*\*)-2-(4-chlorobenzyl)-1,5-dimethyl-6,7,8-trioxabicyclo[3.2.1]octan-2-ylmethanol, 4

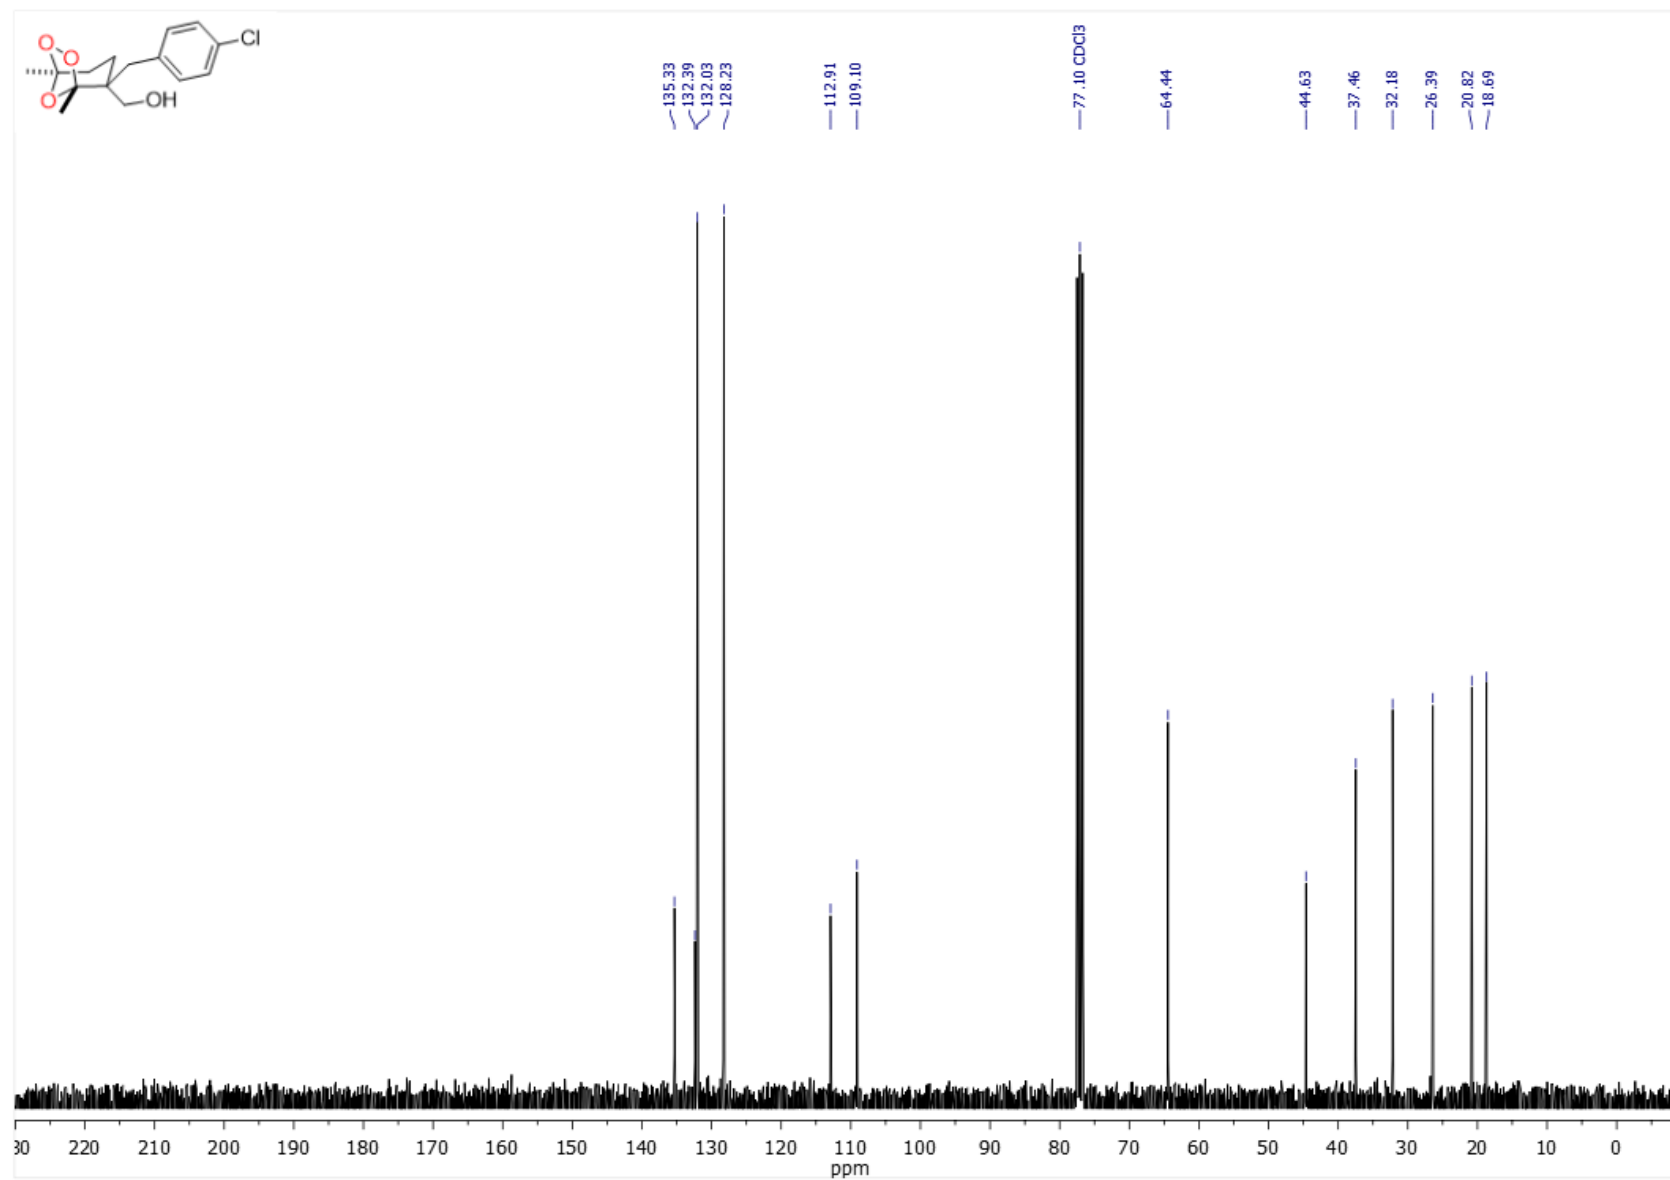

# HRMS spectra of peroxide 4

(1*R*\*,2*S*\*,5*S*\*)-2-(4-chlorobenzyl)-1,5-dimethyl-6,7,8-trioxabicyclo[3.2.1]octan-2-yl)methanol, 4

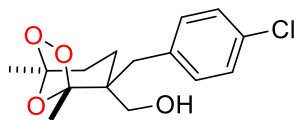

4

## Display Report

### Analysis Info

Analysis Name D:\Data\Chizhov\Terentiev\Radulov\rd1052\_&clblow.d  
Method tune\_low.m  
Sample Name /TERN Rd1052  
Comment CH3CN 100 %, dil. 200, calibrant added

Acquisition Date 21.02.2020 16:25:21

Operator BDAL@DE  
Instrument / Ser# microTOF 10248

### Acquisition Parameter

|             |            |                      |          |                  |           |
|-------------|------------|----------------------|----------|------------------|-----------|
| Source Type | ESI        | Ion Polarity         | Positive | Set Nebulizer    | 0.4 Bar   |
| Focus       | Not active |                      |          | Set Dry Heater   | 180 °C    |
| Scan Begin  | 50 m/z     | Set Capillary        | 4500 V   | Set Dry Gas      | 4.0 l/min |
| Scan End    | 3000 m/z   | Set End Plate Offset | -500 V   | Set Divert Valve | Waste     |

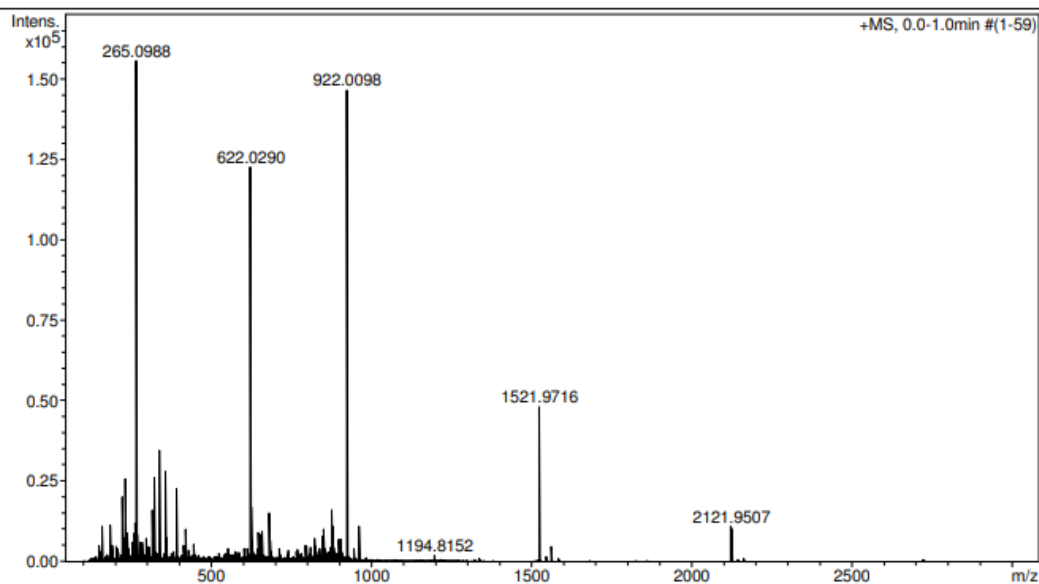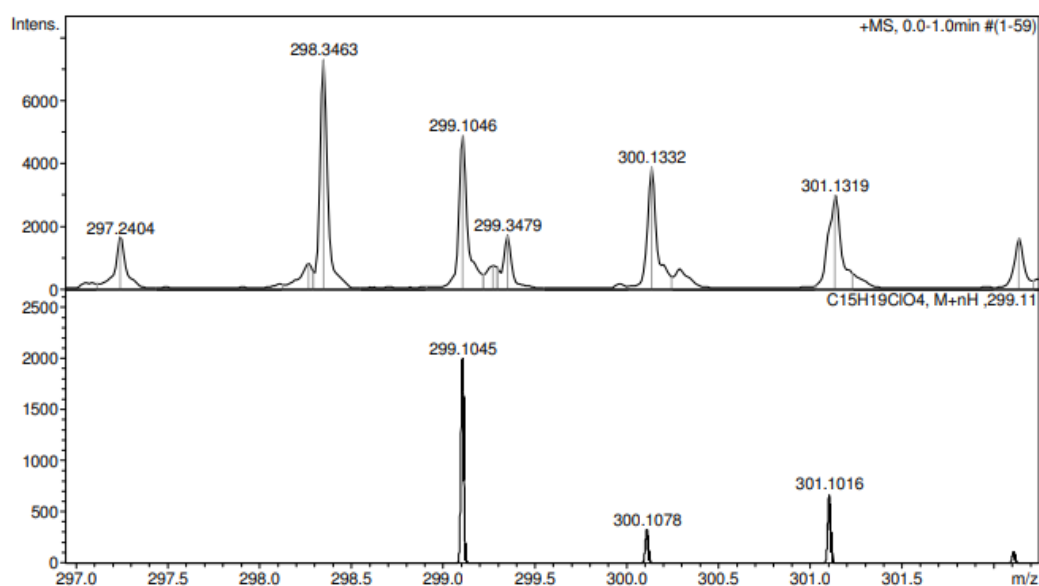

Supplement: s1 [file s1]
